# Supplementary material
Source: publisher figshare collection journal article supplement (https://gsajournals.figshare.com/articles/dataset/_/7294937)
Supplement: Supplementary file 1 [file 1]

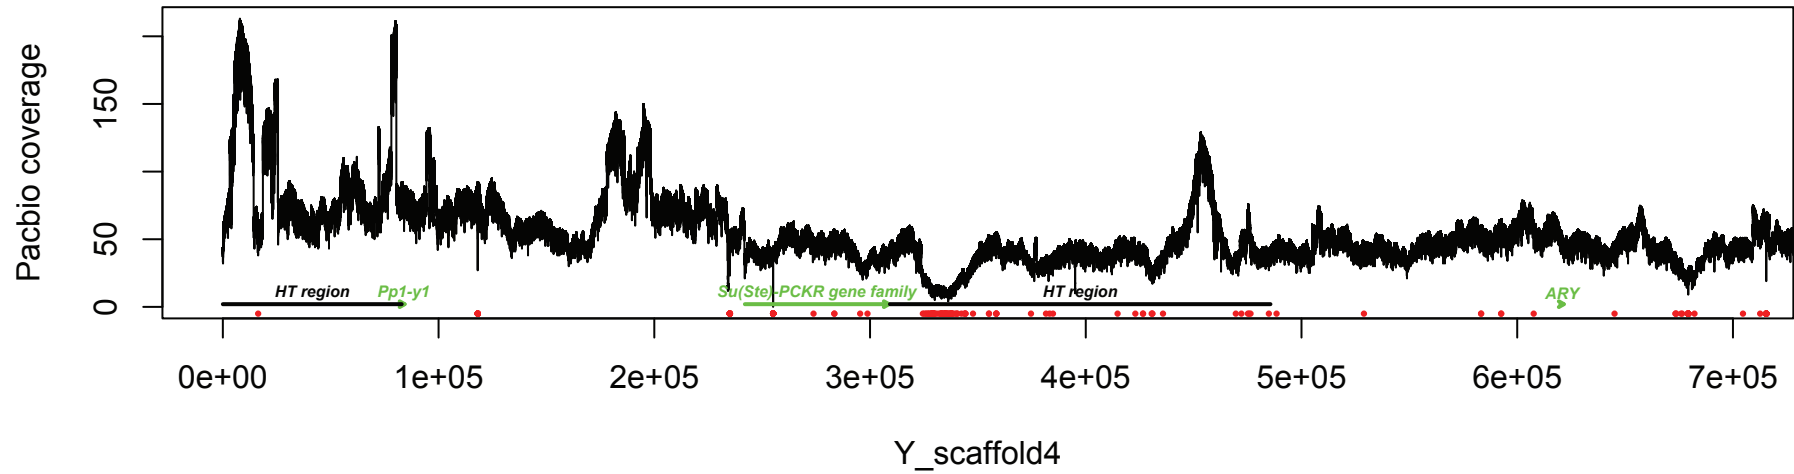

**Figure S6. Pacbio read coverage between Pp1-Y1 and ARY.** We show the first 700kb of Y\_scaffold4, which contains the HT regions and genes. The black line plot the depth of each site with all reads and the red dots indicate the regions with high quality ( $Q>10$ ) coverage  $\leq 3$ .
