# Supplementary material
Source: publisher figshare collection journal article supplement (https://gsajournals.figshare.com/articles/dataset/_/7294937)
Supplement: Supplementary file 1 [file 1]

## Sheet: all
Table S9. Distribution of complex repeats across contigs
Contig	2L_1	2L_2	2R_16	2R_18	2R_19	2R_20	2R_21	2R2_56_D1828	3_scaffold1	3_scaffold2	3Cen_27_D1777	3Cen_31_D1643_D1653_D1791_1	3Cen_31_D1643_D1653_D1791_5	3Cen_31_D1643_D1653_D1791_6	3Cen_31_D1643_D1653_D1791_8	3Cen_36_D1605_1	3Cen_36_D1605_2	3Cen_50_D1686_1	3Cen_50_D1686_2	3L_1	3L_10	3L_3	3L_4	3L_5	3L_8	3R_1	3R_10	3R_2	3R_28	3R_3	3R_4	3R_5	3R_6	3R_8	3R_9	4_2	Contig101	Contig102	Contig103	Contig11	Contig111	Contig112	Contig114	Contig117	Contig119	Contig120	Contig121	Contig123	Contig128
roo base	156112	72448	50	441	0	31947	174417	0	41827	17632	0	0	0	0	0	0	0	0	0	243528	32914	0	39707	8256	0	0	0	0	179601	0	0	0	0	0	4854	0	0	0	0	5282	0	0	0	0	0	0	0	0	0
gypsy12 base	0	4374	17573	4898	9398	18276	41206	0	48081	18689	0	0	0	0	0	0	0	0	0	1930	5392	1468	23999	0	0	0	0	0	0	0	0	0	0	0	0	0	0	0	0	0	0	0	0	0	0	0	0	0	0
gypsy-1_dsim base	0	41513	8145	9464	2143	98261	24377	0	83509	34833	0	0	0	0	368	0	0	0	0	33332	23186	5396	56563	13662	0	0	0	0	240	0	0	0	0	0	0	8631	0	0	0	0	0	0	0	0	0	0	0	0	0
dmcr1a base	2126	46617	9212	38032	16037	101576	74716	0	170699	86270	0	0	0	2425	2098	0	0	0	0	114193	45182	0	95546	24302	0	0	0	0	4141	0	0	0	0	0	0	16321	0	0	0	0	0	0	0	0	0	0	0	0	0
batumi base	0	13219	8537	14915	190	21890	33425	0	36326	50106	0	4848	0	0	7682	0	0	0	0	13513	0	0	44389	0	0	0	0	0	0	0	0	0	0	0	0	0	0	0	0	0	0	0	0	0	0	17399	0	0	0
sar_dm base	15045	13591	0	1277	0	0	2543	0	0	0	0	0	0	0	0	0	0	0	0	297	10866	54283	23967	15781	4875	0	0	0	7964	0	0	0	0	0	0	0	48587	4912	6992	0	0	0	0	0	0	20629	0	0	0
stalker4 base	379	23240	9829	22632	24403	26590	14891	0	85396	17620	0	13582	0	0	0	0	0	0	0	25594	48223	0	62597	17364	0	0	0	0	22003	0	0	0	0	7126	17761	0	0	0	0	43804	0	0	0	0	0	0	0	0	0
fw_dm base	25662	28671	25816	11682	5704	46724	65378	4194	106446	64560	0	0	0	0	4692	0	0	0	0	62901	19848	0	56088	13582	0	0	0	0	34357	2573	0	0	0	0	7348	3549	0	0	0	13746	0	0	0	0	0	0	0	0	0
lsu-rrna_dme base	0	0	0	0	0	0	0	0	0	0	0	0	0	0	0	0	0	0	0	0	0	0	0	0	0	0	0	0	0	0	0	0	0	0	0	80	0	0	0	0	9681	16231	13103	10809	0	0	10914	8071	8083
idefix base	2633	12936	9845	983	7839	32088	7242	0	28467	50207	0	0	0	0	0	0	0	0	0	21432	42930	0	23925	8396	0	0	0	0	6816	0	0	0	0	0	0	0	0	0	0	0	0	0	17437	0	0	0	0	0	0
doc base	54314	26484	9406	13393	10115	37461	34051	0	46463	29116	0	0	0	0	4694	0	0	0	0	71813	29232	0	25128	6614	0	0	0	0	39421	0	0	0	0	0	4723	0	1356	0	0	7514	0	0	0	0	4682	0	0	0	0
tart-a base	1560	0	0	0	0	0	21955	0	0	0	0	0	0	0	0	0	0	0	0	466	0	0	1730	0	0	0	0	0	15399	0	0	0	0	0	0	15172	0	0	0	0	0	0	0	0	0	0	0	0	0
r1_dm base	0	1636	0	6932	0	1444	6332	0	497	0	0	0	0	0	0	0	0	0	0	7012	0	0	5301	0	0	0	0	0	0	0	0	0	0	0	0	5604	0	0	0	0	5356	5913	7950	7719	0	0	8924	10712	10113
quasimodo base	22786	4524	3930	0	387	38669	13490	0	13862	21998	0	0	0	639	1575	0	0	0	0	61198	24976	0	41149	37895	0	0	0	0	7405	0	0	0	0	0	0	626	0	0	0	0	0	0	0	0	0	0	0	0	0
protop_a base	4255	21774	2785	12657	15088	16499	20904	0	47017	26628	0	0	0	0	1284	0	0	0	0	40912	11762	0	18304	5881	0	0	0	0	10039	0	0	1105	0	0	0	25874	0	0	0	0	0	0	0	0	0	0	0	0	0
dnarep1_dsim base	27075	47600	8949	10640	3988	30171	96239	0	24672	26711	0	0	0	902	0	0	0	0	0	71124	16969	0	22088	4389	0	0	0	0	25965	0	0	0	0	0	0	63021	0	0	0	0	0	0	242	0	0	0	0	0	0
nts_dm base	0	0	0	0	0	0	0	0	0	0	0	0	0	0	0	0	0	0	0	0	0	0	0	0	0	0	0	0	34	0	0	28223	0	0	0	0	0	0	0	0	8300	8923	12416	7517	32	0	4282	6992	8958
heta base	6994	0	0	0	0	0	57599	0	2807	0	0	120	0	0	0	0	0	0	0	344	0	0	0	0	0	0	0	0	0	0	0	0	0	0	0	23467	0	0	0	0	0	0	0	0	0	0	0	0	0
protop base	11910	28839	6289	19009	730	13994	21142	0	26371	17024	0	0	0	0	0	0	0	0	0	12214	12792	0	12527	264	0	0	0	0	3088	0	0	0	0	0	0	8535	0	0	0	0	0	0	0	0	0	0	0	0	0
dm176 base	0	2789	16314	1260	7883	80271	22335	0	39879	520	0	0	0	0	0	0	0	0	0	63827	1023	0	15612	0	0	0	0	0	14164	0	0	0	0	0	0	0	0	0	0	0	0	0	0	0	0	0	0	0	0
dmrt1b base	6712	22536	3427	14919	14553	10719	46553	0	30412	31651	0	4138	0	0	2473	0	0	0	0	33630	30243	0	50449	19680	0	0	0	0	17754	0	0	0	0	0	0	0	0	0	0	0	0	0	0	0	2464	0	0	0	0
dmsat6 base	0	0	0	0	0	0	859	0	38825	0	11905	0	0	0	0	26257	9368	5500	14263	52	0	0	0	0	0	26810	31733	3370	0	10551	2265	33349	43813	8861	28964	0	0	0	0	222129	0	0	0	0	0	0	0	0	0
dm297 base	68390	7363	11846	6863	7865	18608	41188	0	84869	11004	0	0	0	0	0	0	0	0	0	44629	5891	0	16851	0	0	0	0	0	53492	0	0	0	0	0	0	3397	0	0	0	0	0	284	0	0	0	0	0	0	0
mdg1 base	14837	806	797	7805	0	34503	61612	0	25462	33185	0	0	0	0	0	0	0	0	0	29398	2009	0	12579	0	0	0	0	0	21924	0	0	0	0	0	0	0	0	0	0	0	0	0	0	0	0	0	0	0	0
copia base	53250	21040	0	360	0	2732	36860	0	5260	5145	0	0	0	0	0	0	0	0	0	35431	5145	0	5260	5145	0	0	0	0	30870	0	0	0	0	0	0	0	0	0	0	0	4483	0	0	0	0	0	0	0	0
nomad base	45197	0	0	4559	0	21488	32110	0	8228	7607	0	0	0	0	0	0	0	0	0	36569	1594	0	18768	1187	0	0	0	0	16970	0	0	0	0	0	0	0	0	0	0	0	7608	0	0	0	0	0	0	0	0
max base	0	27699	11769	3884	1121	17439	35331	0	13182	14131	0	0	0	0	321	0	0	0	0	14310	9417	0	36367	857	4473	0	0	0	0	0	0	0	0	0	0	0	0	0	0	0	0	0	0	0	0	0	0	0	0
dnarep1_dm base	17876	43309	5319	6208	5677	16531	62918	0	12146	11880	0	0	0	0	0	0	0	0	0	53920	8741	161	18057	3195	0	0	0	0	32070	0	0	0	0	0	0	51255	0	0	0	0	0	0	407	0	0	0	0	0	0
ssu-rrna_dme base	0	0	0	0	0	0	0	0	0	0	0	0	0	0	0	0	0	0	0	0	0	0	0	0	0	0	0	0	0	0	0	0	0	0	0	0	0	0	0	0	5985	7980	9975	3990	0	0	4060	3990	3990
baggins1 base	2139	16844	16201	16109	12766	44472	45956	0	24216	14736	0	0	0	0	1913	0	0	0	0	29048	16605	0	23750	7166	0	0	0	0	0	0	0	0	0	0	0	0	0	0	0	0	0	0	0	0	0	0	0	0	0
tahre base	6721	0	0	0	0	0	11422	0	60	0	0	947	0	0	0	0	0	0	0	0	0	0	696	0	0	0	0	0	0	0	0	0	0	0	0	2424	0	0	0	0	0	0	0	0	0	0	0	0	0
invader2 base	798	16074	0	500	5114	46606	21712	0	50088	16314	0	0	0	0	0	0	0	0	0	10086	14440	0	3389	5024	0	0	0	0	0	0	0	0	0	0	0	0	0	0	0	0	0	0	0	0	0	0	0	0	0
dm412 base	44	3701	55	0	0	6960	35137	0	10430	8838	0	0	0	0	0	0	0	0	0	69512	0	0	7214	0	0	0	0	0	34190	0	0	0	0	0	0	0	0	0	0	0	0	0	0	0	0	0	0	0	0
gypsy base	482	2497	4988	20664	0	3025	24980	0	19739	20598	0	0	0	0	0	0	0	0	0	12847	6507	0	38725	90	0	0	0	0	438	0	0	0	0	0	0	0	0	0	0	0	0	0	0	0	0	0	0	0	0
ninja base	0	5564	0	4974	0	12519	12432	0	5753	3664	0	0	0	0	0	0	0	0	0	6787	14524	0	12124	19720	0	0	0	0	0	0	0	0	0	0	0	84	0	0	0	0	0	0	632	0	0	0	0	0	0
gypsy-6_dse base	0	9661	0	5389	0	33898	52806	0	11672	5781	0	0	0	0	0	0	0	0	0	5705	0	0	17611	0	0	0	0	0	0	0	0	0	0	0	0	0	0	0	0	0	0	0	0	0	0	0	0	0	0
bs2 base	14219	4311	3281	1669	0	23501	21977	0	19792	5078	0	395	0	297	297	0	0	0	0	42030	5334	4708	24440	4703	0	0	0	0	1858	0	0	0	0	0	0	768	0	0	0	0	0	0	0	0	0	0	0	0	0
doc3_dm base	404	1081	4013	7393	0	31228	16338	0	66620	34697	0	0	0	0	0	0	0	0	0	16451	7754	0	34369	7562	0	0	0	0	186	0	0	0	0	0	0	2642	0	0	0	0	0	0	0	0	0	0	0	0	0
gypsy2_dm base	0	24443	9334	6942	2573	3453	9054	0	4240	5726	0	0	0	0	0	0	0	0	0	7621	7197	0	17169	0	0	0	0	0	7209	0	0	0	0	0	0	0	0	0	0	0	0	0	0	0	0	0	0	0	0
gypsy4 base	0	20955	1824	5725	0	26368	2425	0	42758	14882	0	0	0	0	0	0	0	0	0	12651	29542	0	25696	7979	0	0	0	0	321	0	0	0	0	0	0	0	0	0	0	0	0	0	0	0	0	0	0	0	0
dmrt1a base	0	5743	319	2885	0	16320	23990	0	38837	30037	0	0	0	0	0	0	0	0	0	27419	5765	0	10200	3600	0	0	0	0	10362	0	0	0	0	0	0	0	0	0	0	0	0	0	0	0	0	0	0	0	0
gypsy-4_dsim base	0	0	8532	10730	0	12603	27310	0	19544	14020	0	0	0	1257	1257	0	0	0	0	8133	6936	0	20875	3855	0	0	0	0	0	0	0	0	0	0	0	0	0	0	0	0	0	0	0	0	0	0	0	0	0
gypsy-6_dsim base	0	61	9741	367	0	5599	2120	0	4511	19213	0	0	0	0	0	0	0	0	0	7779	132	0	0	0	0	0	0	0	0	0	0	0	0	0	0	0	0	0	0	0	0	0	0	0	0	0	0	0	0
accord2 base	0	2018	2143	8539	0	19327	11823	0	0	16974	0	0	0	0	1239	0	0	0	0	213	0	0	11577	0	0	0	0	0	0	0	0	0	0	0	0	0	0	0	0	0	0	0	0	0	0	0	0	0	0
blood base	77409	258	7012	7012	0	243	14024	0	39986	0	0	0	0	0	0	0	0	0	0	21036	0	0	0	0	0	0	0	0	35060	0	0	0	0	0	0	0	0	0	0	0	0	0	0	0	0	0	0	0	0
gypsy_6b base	0	20655	797	14388	0	24688	10822	0	20333	8951	0	0	0	0	0	0	0	0	0	10925	0	0	10399	702	0	0	0	0	0	0	0	0	0	0	0	0	0	0	0	14646	0	0	0	0	0	0	0	0	0
tirant base	24878	10843	0	673	0	485	25623	0	10626	0	0	0	0	0	0	0	0	0	0	45609	5741	0	7678	5911	0	0	0	0	42664	0	0	0	0	0	0	8525	0	0	0	0	0	0	0	0	0	0	0	0	0
i_dm base	7908	3266	9129	15368	10908	37584	4814	0	15223	23436	0	0	0	0	0	0	0	0	0	23076	7382	0	8210	0	0	0	0	0	16482	0	0	0	0	0	0	8551	0	0	0	0	0	0	0	0	0	0	0	0	0
protop_b base	1700	14775	3970	3269	1779	17306	23997	0	9820	6853	0	0	0	0	0	0	0	0	0	13695	35504	0	11521	1321	0	0	0	0	1519	0	0	0	0	0	0	11398	0	0	0	0	0	0	0	0	0	0	0	0	0
mdg3 base	11565	267	0	0	0	5520	5905	0	4079	0	0	0	0	0	0	0	0	0	0	11321	0	0	11361	0	0	0	0	0	22080	0	0	0	0	0	0	0	0	0	0	0	0	0	0	0	0	0	0	0	0
r2_dm base	0	0	0	0	0	0	0	0	0	0	0	0	0	0	0	0	0	0	0	61	0	0	0	0	0	0	0	0	42	0	0	0	0	0	0	0	0	0	0	0	0	1067	9444	3601	0	0	6582	4118	0
sar2_dm base	16152	36327	0	92	0	0	5867	0	0	0	0	0	0	0	0	0	0	0	0	5265	816	1481	485	1271	0	0	0	0	8742	0	0	0	0	0	0	0	0	461	479	0	0	0	0	0	0	636	0	0	0
micropia base	93	476	3954	447	0	476	9405	0	21890	10856	0	4658	0	0	0	0	0	0	0	860	1742	0	1165	2090	0	0	0	0	17250	0	0	0	0	0	0	0	0	0	0	0	0	0	0	0	0	0	0	0	0
doc2_dm base	0	12772	0	3553	810	17936	16911	0	24823	2384	0	1347	0	0	4202	0	0	0	0	3148	9072	0	1399	0	0	0	0	0	0	0	0	0	0	0	0	0	0	0	0	0	0	0	0	0	4220	0	0	0	0
gypsy2 base	0	3460	25755	17088	0	23380	15565	95	22559	1861	0	0	0	0	0	0	0	0	0	28318	16692	0	15176	6025	0	0	0	0	0	0	0	0	0	0	0	336	0	0	0	0	0	0	0	0	0	0	0	0	0
bel-6_dya base	0	21924	7597	7702	7651	2403	14195	0	11595	9861	0	0	0	0	0	0	0	0	0	3411	0	0	9407	0	0	0	0	0	0	0	0	0	0	0	0	0	0	0	0	0	0	0	0	0	0	0	0	0	0
gypsy5 base	0	289	25515	3013	0	12495	7009	0	3657	9089	0	0	0	0	0	0	0	0	0	4050	10203	0	12157	10847	0	0	0	0	0	0	0	0	0	0	0	0	0	0	0	0	0	0	0	0	0	0	0	0	0
invader1 base	0	6214	0	4555	3820	1252	10877	0	31490	2023	0	0	0	0	423	0	0	0	0	6055	42554	0	2275	4773	0	0	0	0	6461	0	0	0	0	0	0	423	0	0	0	0	0	0	0	0	0	0	0	0	0
rover_dm base	0	220	300	0	7291	7820	7870	0	8293	9688	0	193	0	0	0	0	0	0	0	613	13334	0	6814	367	0	0	0	0	14058	0	0	0	0	0	0	0	0	0	0	0	0	0	0	0	0	0	0	0	0
copia2 base	0	17861	8776	2568	0	2423	19099	0	35898	3381	0	0	0	0	0	0	0	0	0	7490	0	0	0	1699	0	0	0	0	12193	0	0	0	0	0	0	0	0	0	0	0	0	0	0	0	0	0	0	0	0
invader3 base	3298	5484	0	298	5484	19840	11122	0	6264	298	0	0	0	0	3980	0	0	0	0	4584	11510	0	6560	822	0	0	0	0	16510	0	0	0	0	0	0	0	0	0	0	0	0	0	0	0	0	0	0	0	0
g2_dm base	9932	1177	0	3490	0	3204	2303	0	306	0	0	0	0	0	0	0	0	0	0	1229	0	0	0	0	0	0	0	0	3067	0	0	5711	0	0	550	0	0	0	0	3099	0	0	0	0	11010	0	0	0	0
linej1_dm base	21224	1838	0	0	1898	1840	41301	0	460	0	0	0	0	0	2259	0	0	0	0	22370	479	0	0	0	0	0	0	0	26610	0	0	0	0	0	0	2325	0	0	0	0	0	0	0	0	0	0	0	0	0
hmsbeagle base	25364	18213	0	463	0	6956	6325	0	16354	21631	0	0	0	0	0	0	0	0	0	5104	20285	0	11706	0	0	0	0	0	10429	0	0	0	0	0	0	167	0	0	0	0	0	0	0	0	0	0	0	0	0
fb4_dm base	5743	18438	0	3526	8610	5230	18862	0	3325	2713	0	0	0	0	0	0	0	0	0	16295	9573	146	2104	0	0	0	0	0	16060	0	0	0	0	0	0	11492	0	0	0	0	0	0	0	0	0	0	0	0	0
rooa base	0	13803	8547	3873	386	6865	51245	0	15776	8565	0	0	0	0	0	0	0	0	0	3786	7885	0	1158	3823	0	0	0	0	351	0	0	0	0	0	0	9726	0	0	0	0	0	0	0	0	0	0	0	0	0
rsp base	0	0	126735	0	0	0	90	0	0	0	0	0	0	0	0	0	0	0	0	1355	0	0	0	0	0	0	0	0	0	0	0	0	0	0	0	0	0	0	0	0	0	0	0	0	0	0	0	0	0
ivk_dm base	198	12124	4443	625	6059	35116	5471	0	13245	18632	0	0	0	0	0	0	0	0	0	6166	21943	0	0	4801	0	0	0	0	150	0	0	0	0	0	0	0	0	0	0	0	0	0	0	0	0	0	0	0	0
gypsy-10_dbp base	191	4943	46	4399	479	13742	2274	0	12523	2115	0	0	0	0	0	0	0	0	0	4255	1124	187	7416	729	0	0	0	0	0	0	0	0	0	0	0	0	0	0	0	0	0	0	0	0	0	0	0	0	0
diver base	6091	4182	6091	5900	0	5553	18273	0	14758	0	0	0	0	0	0	0	0	0	0	6315	9806	0	0	0	0	0	0	0	18273	0	0	0	0	0	3501	0	0	0	0	6210	0	0	0	0	0	0	0	0	0
gypsy1_dm base	6727	6898	351	0	0	15928	1522	0	13964	633	0	0	0	0	0	0	0	0	0	17792	16136	0	15578	0	0	0	0	0	14379	0	0	0	0	0	0	0	0	0	0	0	0	0	0	0	0	0	0	0	0
s_dm base	2464	8088	3859	0	7833	3480	16719	0	12068	5099	0	0	0	0	0	0	0	0	0	18477	6300	0	7537	193	0	0	0	0	11221	0	0	0	0	0	0	2936	0	0	0	0	0	0	0	0	0	0	0	0	0
copia-2_dya base	0	1892	263	5860	934	1119	349	0	11977	0	0	0	0	0	0	0	0	0	0	8026	606	0	0	263	0	0	0	0	263	0	0	0	0	0	0	0	0	0	0	0	0	0	0	0	0	0	0	0	0
jockey-3_dgri base	20026	80	0	0	0	0	24575	0	0	0	0	0	0	0	0	0	0	0	0	25715	0	0	0	0	0	0	0	0	36862	0	0	0	0	0	0	0	0	0	0	0	0	0	0	0	0	0	0	0	0
circe base	0	11106	1476	923	0	4395	3968	0	13955	43258	0	0	0	0	0	0	0	0	0	0	14097	0	2152	0	0	0	0	0	0	0	0	0	0	0	0	0	0	0	0	0	0	0	1469	0	0	0	0	0	0
dm1731 base	44	0	0	0	10265	8956	4648	0	4599	1246	0	0	0	0	0	0	0	0	0	4269	0	0	11571	0	0	0	0	0	4714	0	0	0	0	0	0	0	0	0	0	0	0	0	0	0	0	0	0	0	0
jockey-3_dsim base	4996	0	0	0	0	529	533	0	4343	0	0	0	0	0	0	0	0	0	0	102	0	0	0	0	0	0	0	0	0	0	0	0	0	0	0	0	0	0	0	0	0	0	0	0	6108	0	0	0	0
zam base	0	1849	20941	3600	8161	1863	417	0	2297	7887	0	0	0	0	0	0	0	0	0	11133	6128	0	967	0	0	0	0	0	0	0	0	0	0	0	0	0	0	0	0	0	0	0	0	0	0	0	0	0	0
dnarep1_dyak base	6781	11160	944	2527	2025	5883	24076	0	1551	4828	0	0	0	0	0	0	0	0	0	19478	2162	0	9362	2192	0	0	0	0	10395	0	0	0	0	0	0	16123	0	0	0	0	0	0	0	0	0	0	0	0	0
quasimodo2_dm base	89	7489	0	0	0	996	7640	0	18526	5907	0	0	0	0	0	0	0	0	0	5997	0	0	10257	11000	0	0	0	0	0	0	0	0	0	0	0	5500	0	0	0	0	0	0	0	0	0	0	0	0	0
burdock base	8406	13024	0	19055	9481	3153	21390	0	3070	6666	0	0	0	0	0	0	0	0	0	0	174	0	6278	0	0	0	0	0	20392	0	0	0	0	0	0	0	0	0	0	0	0	0	0	0	0	0	0	0	0
gtwin base	21243	884	91	320	0	6638	2327	0	567	2318	0	0	0	0	6702	0	0	0	0	3490	18536	0	0	1628	0	0	0	0	0	0	0	0	0	0	0	0	0	0	0	0	0	0	0	0	0	0	0	0	0
gypsy-2_dsim base	54	4767	0	3323	0	0	388	0	4533	5842	0	0	0	0	0	0	0	0	0	1175	9807	0	9893	390	0	0	0	0	0	0	0	0	0	0	0	0	0	0	0	0	0	0	0	0	0	0	0	0	0
accord base	77	0	14250	14286	0	558	5134	0	34353	6143	0	0	0	0	0	0	0	0	0	0	0	0	0	0	0	0	0	0	0	0	0	0	0	0	0	0	0	0	0	0	0	0	0	0	0	0	0	0	0
stalker2 base	40	586	0	718	843	9209	9404	0	2014	0	0	721	0	0	0	0	0	0	0	16214	2732	0	1166	0	0	0	0	0	7455	0	0	0	0	0	0	8366	0	0	0	565	0	0	0	0	0	0	0	0	0
chimpo base	0	959	0	0	0	4473	4753	0	0	7635	0	0	2896	8531	0	0	0	0	0	4892	0	0	7933	0	0	0	0	0	0	0	0	0	0	0	0	4225	0	0	0	0	0	0	0	0	0	0	0	0	0
blastopia base	10061	0	0	0	0	0	32326	0	0	0	0	0	0	0	0	0	0	0	0	5031	0	0	0	0	0	0	0	0	10062	0	0	0	0	0	0	0	0	0	0	0	0	0	5031	0	0	0	0	0	0
gypsy-13_dsim base	0	8278	1489	2944	2206	5683	17559	0	25517	18577	0	0	0	0	0	0	0	0	0	10183	2894	0	13229	0	0	0	0	0	0	0	0	0	0	0	0	496	0	0	0	0	0	0	0	0	0	0	0	0	0
gypsy-12_dsim base	0	363	1022	1113	0	10116	3246	0	20256	2685	0	0	0	0	0	0	0	0	0	14163	288	0	5945	0	0	0	0	0	0	0	0	0	0	0	0	0	0	0	0	0	0	0	0	0	0	0	0	0	0
bica base	0	9437	20422	4439	0	0	2103	0	23582	8271	0	0	0	0	0	0	0	0	0	12136	0	0	10698	0	0	0	0	0	2510	0	0	0	0	0	0	0	0	0	0	0	0	0	0	0	0	0	0	0	0
jockey-1_der base	0	0	0	2225	0	499	7438	0	999	652	0	0	0	0	0	0	0	0	0	5073	3967	0	628	7282	0	0	0	0	0	0	0	0	0	0	0	0	0	0	0	0	1230	1424	968	1068	0	0	668	712	820
gypsy-3_dki base	0	10281	0	250	0	0	5248	0	14932	35093	0	0	0	0	4158	0	0	0	0	0	7440	0	0	0	0	0	0	0	0	0	0	0	0	0	0	0	0	0	0	0	0	0	0	0	0	0	0	0	0
gypsy-5_dse base	0	0	0	1662	5447	0	0	0	50785	3059	0	0	0	0	0	0	0	0	0	0	0	0	7357	0	0	0	0	0	0	0	0	0	0	0	0	0	0	0	0	0	0	0	0	0	0	0	0	0	0
doc5_dm base	0	9001	12677	9065	0	6133	4802	3579	19865	9560	0	0	0	0	0	0	0	0	0	8702	2418	0	22296	0	0	0	0	0	0	0	0	0	0	0	0	75	0	0	0	0	0	0	0	0	0	0	0	0	0
tabor base	10756	0	0	0	0	16289	6842	6336	0	0	0	0	0	0	0	0	0	0	0	0	0	0	0	0	0	0	0	0	0	0	0	0	0	0	0	0	0	0	0	0	0	0	0	0	0	0	0	0	0
hetrp_dm base	10511	58	0	0	0	0	16448	0	0	0	0	0	0	0	0	0	0	0	0	3815	0	0	0	0	0	0	0	0	14486	0	0	0	0	0	0	0	0	0	0	0	0	0	0	0	0	0	0	0	0
bel base	0	6668	0	0	0	24293	11416	0	0	0	0	0	0	0	0	0	0	0	0	24735	10069	0	596	335	0	0	0	0	0	0	0	0	0	0	0	0	0	0	0	0	0	0	0	0	0	0	0	0	0
gypsy-26_dya base	407	10445	1205	7989	475	6262	11811	0	12346	14323	0	0	0	0	0	0	0	0	0	15361	6909	0	6502	2671	0	0	0	0	56	0	0	0	0	0	0	491	0	0	0	0	0	0	0	0	0	0	0	0	0
tart_dv base	14140	150	0	0	0	0	14609	0	0	0	0	0	0	0	0	0	0	0	0	23028	0	0	0	0	0	0	0	0	22653	0	0	0	0	0	0	0	0	0	0	0	0	0	0	0	0	0	0	0	0
g5_dm base	3515	2179	27756	0	0	18230	10375	0	19933	3086	0	0	0	0	0	0	0	0	0	1392	2025	0	1064	0	0	0	0	0	3737	0	0	0	0	0	0	808	0	0	0	0	0	0	0	0	141	0	0	0	0
hobo base	25038	0	0	0	0	7466	6623	0	1704	780	0	0	0	0	0	0	0	0	0	2021	0	0	1207	104	0	0	0	0	12211	0	0	0	0	0	0	0	0	0	0	0	0	0	0	0	0	0	0	0	0
gypsy12a base	0	9475	0	5513	0	16029	14083	0	7814	7052	0	0	0	0	0	0	0	0	0	6406	4209	488	12833	1807	0	0	0	0	1988	0	0	0	0	0	0	480	0	0	0	0	0	0	0	0	0	0	0	0	0
transpac base	5250	0	0	0	5250	5255	5250	0	5171	5250	0	0	0	0	0	0	0	0	0	5250	5250	0	0	5250	0	0	0	0	10500	0	0	0	0	0	0	0	0	0	0	0	0	0	0	0	0	0	5250	0	0
transib2 base	2300	3805	6677	976	0	5710	11252	0	4825	0	0	0	0	0	0	0	0	0	0	2633	17720	0	5604	499	0	0	0	0	42	0	0	0	0	0	0	0	0	0	0	0	0	0	0	0	0	0	0	0	0
diver2 base	0	6233	1921	3203	2670	770	9530	0	11179	5595	0	0	0	0	0	0	0	0	0	12495	1979	0	2889	1847	0	0	0	0	0	0	0	0	0	0	0	0	0	0	0	0	0	0	0	0	0	0	0	0	0
gypsy7 base	0	0	4698	0	0	0	11057	0	4547	18013	0	0	0	0	0	0	0	0	0	3215	17896	0	1046	29795	0	0	0	0	170	0	0	0	0	0	0	0	0	0	0	0	0	0	0	0	0	0	0	0	0
g_dm base	1774	654	1010	618	0	0	3391	0	570	2333	0	0	0	0	0	0	0	0	0	5174	1247	0	140	0	0	0	0	0	62	0	0	0	0	0	0	0	0	0	0	0	0	0	0	0	418	0	0	0	0
bs base	8562	1998	3875	1248	0	0	12596	0	0	8737	0	0	0	0	0	0	0	0	0	14340	8308	0	0	0	0	0	0	0	12190	0	0	0	0	0	0	0	0	0	0	0	0	0	0	0	129	0	0	0	0
gypsy10 base	0	247	10112	247	7419	10736	11378	0	9121	1350	0	0	0	0	0	0	0	0	0	11665	623	0	0	364	0	0	0	0	0	0	0	0	0	0	0	0	0	0	0	0	0	0	0	0	0	0	0	0	0
copia1_dm base	0	203	9057	0	0	17482	9060	0	21453	0	0	0	0	0	0	0	0	0	0	0	0	0	745	0	0	0	0	0	0	0	0	0	0	0	0	0	0	0	0	0	0	0	0	0	0	0	0	0	0
gypsy20_dya base	0	5094	1289	2044	0	10135	4228	0	12945	3739	0	0	0	0	0	0	0	0	0	8931	3110	0	4759	3058	0	0	0	0	0	0	0	0	0	0	0	369	0	0	0	0	0	0	0	0	0	0	0	0	0
chouto base	0	0	0	618	0	1492	10195	0	40084	10634	0	0	0	0	0	0	0	0	0	618	0	0	18788	0	0	0	0	0	617	0	0	0	0	0	0	0	0	0	0	0	0	0	0	0	0	0	0	0	0
gypsy6 base	806	7179	0	0	6331	7415	7922	0	205	7515	0	0	0	0	0	0	0	0	0	7729	10589	0	407	2252	0	0	0	0	811	0	0	0	0	0	0	0	0	0	0	0	0	0	0	0	0	0	0	0	0
bel-2_dse base	0	8753	0	8868	0	13750	4564	0	6180	0	0	0	0	0	0	0	0	0	0	5002	5981	0	5204	5981	0	0	0	0	0	0	0	0	0	0	0	0	0	0	0	0	0	0	0	0	0	0	0	0	0
gypsy-8_dsim base	154	0	111	0	0	13675	3519	0	24298	3878	0	0	0	0	0	0	0	0	0	82	3054	0	1007	0	0	0	0	0	0	0	0	0	0	0	0	0	0	0	0	0	0	0	0	0	0	0	0	0	0
gypsy-30_dwil base	66	1602	536	0	0	1759	2383	0	5298	0	0	0	0	0	0	0	0	0	0	1278	22524	0	2841	0	0	0	0	0	0	0	0	0	0	0	0	0	0	0	0	0	0	0	0	0	0	0	0	0	0
dmrt1c base	949	9451	0	0	0	5493	6326	0	3999	9823	0	0	0	0	0	0	0	0	0	6511	0	0	5248	0	0	0	0	0	0	0	0	0	0	0	0	149	0	0	0	0	0	0	0	0	0	0	0	0	0
gypsy-4_dbi base	0	10412	0	3108	0	11530	6871	0	2565	5606	0	0	0	237	0	0	0	0	0	16756	6624	181	5328	0	0	0	0	0	0	0	0	0	0	0	0	686	0	0	0	0	0	0	0	0	0	0	0	0	0
g5a_dm base	1416	3448	0	0	0	5966	5176	0	12106	1672	0	0	0	0	0	0	0	0	0	10850	2425	0	9757	0	0	0	0	0	989	0	0	0	0	0	0	0	0	0	0	0	0	0	0	0	0	0	0	0	0
gypsy9_dya base	0	2163	0	5571	0	5827	6873	0	93	0	0	0	0	0	0	0	0	0	0	0	22149	0	1883	3917	0	0	0	0	0	0	0	0	0	0	0	0	0	0	0	0	0	0	0	0	0	0	0	0	0
doc6_dm base	2741	8444	0	0	0	4202	8443	0	0	0	0	0	0	0	0	0	0	0	0	3233	0	0	0	0	0	0	0	0	7222	0	0	0	0	0	0	0	0	0	0	0	0	0	0	0	0	0	0	0	0
invader4 base	644	8173	0	0	0	346	346	0	6207	1874	0	0	0	0	0	0	0	0	0	4289	6370	0	6864	6235	0	0	0	0	346	0	0	0	0	0	0	3105	0	0	0	0	0	0	0	0	0	0	0	0	0
invader6 base	0	393	0	0	0	0	5914	0	0	5362	0	0	0	0	0	0	0	0	0	0	14741	0	3096	18424	0	0	0	0	0	0	0	0	0	0	0	0	0	0	0	0	0	0	0	0	0	0	0	0	0
hat-2_dy base	0	5942	0	978	0	201	973	0	494	2770	0	0	0	0	0	0	0	0	0	3095	2359	0	1402	1181	0	0	0	0	4240	0	0	0	0	0	0	0	0	0	0	0	0	0	0	0	0	0	0	0	0
gypsy-2_dse base	0	91	7067	0	1918	2131	2628	0	19873	6925	0	0	0	0	0	0	0	0	0	6960	530	0	13321	301	0	0	0	0	0	0	0	0	0	0	0	0	0	0	0	0	0	0	0	0	0	0	0	0	0
g6_dm base	0	2042	0	0	0	0	4790	0	2746	0	0	0	0	0	0	0	0	0	0	1805	0	0	3144	0	0	0	0	0	151	0	0	634	0	0	0	70	0	0	0	0	0	0	0	0	0	0	0	0	0
g4_dm base	1140	1827	1395	874	0	0	12698	0	1929	8649	0	0	0	0	0	0	0	0	0	20206	0	0	8894	0	0	0	0	0	2008	0	0	0	0	0	0	160	0	0	0	0	0	0	0	0	0	0	0	0	0
hat-2_dk base	127	0	0	0	0	0	591	0	0	0	0	0	0	0	0	0	0	0	0	472	0	0	0	0	0	0	0	0	0	0	0	0	0	0	0	0	0	0	0	0	0	0	0	0	0	0	0	0	0
m4dm base	6547	636	1435	2062	1434	7374	4427	0	1699	3108	0	0	0	0	0	0	0	0	0	5391	4443	0	0	6369	0	0	0	0	4376	0	0	0	0	0	0	0	0	0	0	0	0	0	0	0	0	0	0	0	0
bari_dm base	1728	0	36205	0	0	1728	1728	0	0	0	0	0	0	0	0	0	0	0	0	0	0	0	0	0	0	0	0	0	3456	0	0	0	0	0	0	1728	0	0	0	0	0	0	0	0	0	0	0	0	0
tart_b1 base	788	0	0	0	0	0	0	0	0	0	0	0	0	0	0	0	0	0	0	0	0	0	1498	0	0	0	0	0	31	0	0	0	0	0	0	1374	0	0	0	0	0	0	0	0	33	0	0	0	0
bs3_dm base	625	1567	2847	0	0	2084	5055	0	16578	1297	0	0	0	0	0	0	0	0	0	13554	2180	0	5684	0	0	0	0	0	184	0	0	0	0	0	0	253	0	0	0	0	0	0	0	0	0	0	0	0	0
doc4_dm base	1664	631	0	4724	159	0	14253	0	12659	2047	0	0	0	0	0	0	0	0	0	548	514	0	12427	0	0	0	0	0	0	0	0	0	0	0	0	0	0	0	0	0	0	0	0	0	0	0	0	0	0
gypsy-11_dsim base	0	1064	0	282	0	14642	3882	0	6657	7610	0	0	0	0	0	0	0	0	0	6995	0	0	232	0	0	0	0	0	0	0	0	0	0	0	0	0	0	0	0	0	0	0	0	0	0	0	0	0	0
jockey2 base	218	565	0	0	2557	1270	1355	0	1040	1288	0	0	0	0	0	0	0	0	0	300	1990	0	4225	0	0	0	0	0	1659	0	0	0	0	0	0	3494	0	0	0	0	0	0	0	0	0	0	0	0	0
gypsy-7_dvir base	0	0	0	4665	0	0	205	0	13350	43	0	0	0	0	0	0	0	0	0	0	10610	0	0	0	0	0	0	0	0	0	0	0	0	0	0	0	0	0	0	0	0	0	0	0	0	0	0	0	0
gypsy8_dpse base	6505	0	0	0	0	0	7998	0	0	0	0	0	0	0	0	0	0	0	0	9774	0	0	0	0	0	0	0	0	13519	0	0	0	0	0	0	0	0	0	0	0	0	0	0	0	0	0	0	0	0
gypsy-8_del base	0	353	0	0	0	459	8402	0	32073	2844	0	0	0	0	0	0	0	0	0	0	0	0	4798	0	0	0	0	0	84	0	0	0	0	0	0	927	0	0	0	0	0	0	0	0	0	0	0	0	0
gypsy-24_dya base	69	0	0	903	0	20902	6330	0	857	6903	0	0	0	0	0	0	0	0	0	1059	0	0	6738	0	0	0	0	0	0	0	0	0	0	0	0	0	0	0	0	0	0	0	0	0	0	0	0	0	0
gypsy-31_dya base	0	9077	1276	3940	0	133	0	0	10465	1283	0	0	0	0	0	0	0	0	0	0	1698	0	0	251	0	0	0	0	85	0	0	0	0	0	0	0	0	0	0	0	0	0	0	0	0	0	0	0	0
gypsy-10_dmoj base	0	3261	3341	2208	280	289	194	0	1844	752	0	0	0	0	0	0	0	0	0	693	3840	0	5166	3936	0	0	0	0	48	0	0	0	0	0	0	0	0	0	0	0	0	0	0	0	0	0	0	0	0
gypsy-5_dsim base	0	0	4432	64	0	2446	784	0	9278	2214	0	0	0	0	0	0	0	0	0	697	2298	0	4032	986	0	0	0	0	0	0	0	0	0	0	0	0	0	0	0	0	0	0	0	0	0	0	0	0	0
tc1_dm base	666	1373	0	4016	1491	1243	5800	0	776	2468	0	0	0	0	0	0	0	0	0	5076	304	0	2926	1887	0	0	0	0	2788	0	0	0	0	0	0	9339	0	0	0	0	0	0	0	0	0	0	0	0	0
xdmr base	304	0	0	0	0	0	238	0	0	0	0	0	0	0	0	0	0	0	0	1033	0	0	0	0	0	0	0	0	2290	0	0	0	0	0	0	0	0	0	0	0	0	0	0	0	0	0	0	0	0
helena_ds base	821	0	0	551	0	123	6813	0	50	7169	0	0	0	0	0	0	0	0	0	2700	6323	0	436	8422	0	0	0	0	678	0	0	0	0	0	0	0	0	0	0	0	0	0	0	0	0	0	0	0	0
copia-1_dsim base	0	4519	0	3117	0	0	3018	0	3374	9575	0	0	0	0	0	0	0	0	0	0	1732	0	3428	1732	0	0	0	0	0	0	0	0	0	0	0	0	0	0	0	0	0	0	0	0	0	0	0	0	0
pifo base	184	782	0	484	0	0	329	0	338	0	0	0	0	0	0	0	0	0	0	116	0	0	0	0	0	0	0	0	0	0	0	0	0	0	0	0	0	0	0	0	0	0	0	0	0	0	0	0	0
gypsy3 base	0	346	0	346	0	6644	18544	0	523	0	0	0	0	0	0	0	0	0	0	4582	642	0	0	1122	0	0	0	0	0	0	0	0	0	0	0	0	0	0	0	0	0	0	0	0	0	0	0	0	0
helitron-n1_dbi base	7452	2364	139	291	368	96	8460	0	54	199	0	0	0	0	0	0	0	0	0	7086	0	0	276	373	0	0	0	0	6950	0	0	0	0	0	0	4190	0	0	0	0	0	0	0	0	0	0	0	0	0
gypsy9 base	0	0	0	0	0	0	5081	0	18977	10392	0	0	0	0	0	0	0	0	0	416	0	7302	0	0	0	0	0	0	0	0	0	0	0	0	0	142	0	0	0	0	0	0	0	0	0	0	0	0	0
copia-1_dbi base	0	0	0	0	0	0	4653	0	3728	10137	0	0	0	0	0	0	0	0	0	1275	799	0	0	0	0	0	0	0	0	0	0	0	0	0	0	0	0	0	0	0	0	0	0	0	0	0	0	0	0
gypsy-1_dse base	0	0	1610	0	0	0	1709	0	6938	17574	0	0	0	0	0	0	0	0	0	1177	657	0	8964	0	0	0	0	0	0	0	0	0	0	0	0	0	0	0	0	0	0	0	0	0	0	0	0	0	0
gypsy-26_dbp base	0	0	10039	3372	0	3441	0	0	0	5427	0	0	0	0	0	0	0	0	0	463	2054	0	2955	0	0	0	0	0	0	0	0	0	0	0	0	0	0	0	0	0	0	0	0	0	0	0	0	0	0
gypsy-4_dse base	0	797	428	0	0	822	0	0	13307	0	0	0	0	0	0	0	0	0	0	0	2690	0	2465	3598	0	0	0	0	0	0	0	0	0	0	0	0	0	0	0	0	0	0	0	0	0	0	0	0	0
tc1-2_dm base	690	2036	79	0	2666	2332	6425	0	1644	5131	0	0	0	0	0	0	0	0	0	2227	2363	0	769	2363	0	0	0	0	3259	0	0	0	0	0	0	5269	0	0	0	0	0	0	0	0	0	0	0	0	0
gypsy-53_del base	0	0	132	0	2460	0	6059	0	6966	0	0	0	0	0	0	0	0	0	0	772	0	0	5999	0	0	0	0	0	0	0	0	0	0	0	0	0	0	0	0	0	0	0	0	0	0	0	0	0	0
jockey-1_dse base	0	0	0	0	0	0	0	0	1217	739	0	0	0	0	0	0	0	0	0	580	0	0	4943	0	0	0	0	0	0	0	0	0	0	0	0	0	0	0	0	0	0	0	0	0	0	0	0	0	0
pogo base	9126	1467	1334	0	0	0	3788	0	954	2121	0	0	0	0	0	0	0	0	0	3499	0	1344	0	0	0	0	0	0	6655	0	0	0	0	0	0	234	0	0	0	0	0	0	0	0	0	0	0	0	0
gypsy-24_dy base	0	0	0	0	4551	3578	880	0	8292	14194	0	0	0	0	0	0	0	0	0	3197	0	0	423	307	0	0	0	0	0	0	0	259	0	0	0	0	0	0	0	0	0	0	0	0	0	0	0	0	0
r1_dsi base	0	207	130	0	0	70	503	0	148	143	0	0	0	0	0	0	0	0	0	0	0	0	0	0	0	0	0	0	0	0	0	0	0	0	0	831	0	0	0	0	0	0	0	0	0	0	0	0	0
transib3 base	0	3997	1482	128	0	1838	1713	0	6554	7298	0	0	0	0	0	0	0	0	0	5100	0	0	0	0	0	0	0	0	1495	0	0	0	0	0	0	2733	0	0	0	0	0	0	0	0	0	0	0	0	0
transib5 base	945	1223	0	0	2988	0	2085	0	16459	5544	0	0	0	0	0	0	0	0	0	2577	0	0	0	0	0	0	0	0	53	0	0	511	0	0	0	0	0	0	0	0	0	0	0	0	0	0	0	0	0
gypsy6a base	325	2411	0	844	0	5424	4226	0	2106	2104	0	0	0	0	0	0	0	0	0	2236	752	0	1520	0	0	0	0	0	0	0	0	0	0	0	0	0	0	0	0	302	0	0	0	0	0	0	0	0	0
jockey-1_dya base	0	684	766	586	1360	908	5529	0	1362	2881	0	0	0	0	357	0	0	0	0	1497	3806	0	3109	359	0	0	0	0	380	0	0	0	0	0	0	46	0	0	0	0	0	0	0	0	0	0	0	0	0
gypsy-23_del base	2409	1943	0	169	1638	738	3886	0	1268	3866	0	0	0	0	0	0	0	0	0	4879	0	0	0	0	0	0	0	0	6160	0	0	0	0	0	0	0	0	0	0	0	0	0	0	0	0	0	0	0	0
copia-1_dse base	0	206	0	6321	206	0	3754	0	0	0	0	0	0	0	0	0	0	0	0	3834	0	0	0	0	0	0	0	0	0	0	0	0	0	0	0	0	0	0	0	0	0	0	0	0	0	0	0	0	0
gypsy-22_dya base	1254	4562	0	0	0	0	0	0	0	0	0	0	0	0	0	0	0	0	0	3512	2194	0	3295	2194	0	0	0	0	0	0	0	0	0	0	0	0	0	0	0	0	0	0	0	0	0	0	0	0	0
gypsy12_dya base	1174	0	0	3826	0	0	308	0	3670	0	0	0	0	0	0	0	0	0	0	274	19537	0	0	0	0	0	0	0	28	0	0	0	0	0	0	0	0	0	0	0	0	0	0	0	0	0	0	0	0
fw2_dm base	0	0	0	1532	2255	1424	1860	0	2535	0	0	0	0	0	915	0	0	0	0	0	3053	0	6616	3053	0	0	0	0	3721	0	0	0	0	0	0	0	0	0	0	0	0	0	0	0	0	0	0	0	0
gypsy-38_dan base	0	196	0	2861	0	0	69	0	1935	4479	0	0	0	0	0	0	0	0	0	2390	0	0	0	543	0	0	0	0	0	0	0	0	0	0	0	0	0	0	0	0	0	0	0	0	0	0	0	0	0
g3_dm base	0	501	441	0	0	885	4226	0	8399	622	0	0	0	498	0	0	0	0	0	1238	774	0	8076	0	0	0	0	0	60	0	0	0	0	0	0	0	0	0	0	0	0	0	0	0	0	0	0	0	0
gypsy8 base	0	4223	0	1296	0	1497	7231	0	4923	3440	0	0	0	0	0	0	0	0	0	3866	0	0	1569	0	0	0	0	0	0	0	0	0	0	0	0	443	0	0	0	0	0	0	0	0	0	0	0	0	0
sat-1_dsim base	252	0	0	0	0	0	568	0	0	0	0	0	0	0	0	0	0	0	0	0	0	0	230	460	0	0	0	0	1014	0	0	0	0	0	0	0	0	0	0	0	0	0	0	0	0	0	0	0	0
bel-4_dfi base	0	5947	459	738	516	1058	6610	0	442	5142	0	0	0	0	0	0	0	0	0	6363	661	0	1078	0	0	0	0	0	0	0	0	0	0	0	0	223	0	0	0	0	0	0	0	0	0	0	0	0	0
gypsy-9_dsim base	362	752	0	1526	358	3556	1319	0	4461	798	0	0	0	0	0	0	0	0	0	895	3258	0	864	528	0	0	0	0	467	0	0	0	0	0	0	0	0	0	0	0	0	0	0	0	0	0	0	0	0
gypsy-27_dya base	148	148	0	0	34	4134	34	0	11117	4184	0	0	0	0	0	0	0	0	0	247	0	0	0	0	0	0	0	0	0	0	0	0	0	0	0	0	0	0	0	0	0	0	0	0	123	0	0	0	0
gypsy-31_del base	292	2420	3653	0	0	0	5831	0	6904	2383	0	0	0	0	0	0	0	0	0	4478	1179	0	0	0	0	0	0	0	209	0	0	0	0	0	0	0	0	0	0	0	0	0	0	0	0	0	0	0	0
mariner2_dm base	199	2648	738	0	812	2468	2431	0	1061	2309	0	0	0	0	0	0	0	0	0	3702	717	0	926	0	0	0	0	0	0	0	0	0	0	0	0	1527	0	0	0	0	0	0	0	0	0	0	0	0	0
gypsy-3_drh base	0	9305	0	491	2064	338	1761	0	753	5644	0	0	0	0	0	0	0	0	0	1375	358	0	1426	0	0	0	0	0	0	0	0	0	0	0	0	0	0	0	0	0	0	0	0	0	0	0	0	0	0
gypsy-52_del base	0	487	736	0	0	952	0	0	235	0	0	0	0	0	0	0	0	0	0	0	520	0	0	0	0	0	0	0	0	0	0	0	0	0	0	0	0	0	0	0	0	0	0	0	0	0	0	0	0
s2_dm base	1300	2196	0	2196	0	1075	2433	0	4792	1555	0	0	0	0	0	0	0	0	0	2664	171	0	3633	1173	0	0	0	0	1411	0	0	0	0	0	0	339	0	0	0	0	0	0	0	0	0	0	0	0	0
transib-1_drh base	3517	931	487	283	0	772	4619	0	110	206	0	0	0	0	0	0	0	0	0	2975	499	0	237	0	0	0	0	0	3814	0	0	0	0	0	0	1832	0	0	0	0	0	0	0	0	0	0	0	0	0
polinton-1_dy base	0	0	0	506	3617	6971	169	0	0	1039	0	0	0	0	0	0	0	0	0	3360	0	0	6732	0	0	0	0	0	0	0	0	0	0	0	0	61	0	0	0	0	0	0	0	0	0	0	0	0	0
jockey-6_dk base	2498	215	0	0	0	0	3761	0	270	0	0	0	0	0	0	0	0	0	0	5299	0	0	0	0	0	0	0	0	6519	0	0	0	0	0	0	0	0	0	0	0	0	0	0	0	0	0	0	0	0
p-1_dy base	366	3144	32	1477	218	3195	3786	0	923	1791	0	0	0	0	0	0	0	0	0	1365	3753	0	618	52	0	0	0	0	486	0	0	0	0	0	0	2581	0	0	0	0	0	0	0	0	0	0	0	0	0
bel-17_del base	0	2250	0	0	0	515	141	0	1188	0	0	0	0	1403	0	0	0	0	0	1449	0	0	15092	0	0	0	0	0	0	0	0	0	0	0	0	0	0	0	0	0	0	0	0	0	0	0	0	0	0
fw3_dm base	0	302	0	0	1620	3030	2319	0	3013	0	0	0	0	0	0	0	0	0	0	1794	1446	0	6182	0	0	0	0	0	0	0	0	0	0	0	0	1040	0	0	0	0	0	0	0	0	0	0	0	0	0
r1_dse base	0	0	116	0	0	105	92	0	0	0	0	0	0	0	0	0	0	0	0	0	0	0	0	0	0	0	0	0	0	0	0	0	0	0	0	0	0	0	0	0	0	0	0	0	0	0	4139	0	0
r1-2_dm base	0	473	2187	0	0	836	1859	0	4136	1275	0	0	0	0	0	0	0	0	0	1286	1959	0	4704	0	0	0	0	0	0	0	0	0	0	0	0	0	0	0	0	0	0	0	0	0	0	0	0	0	0
gypsy-7_dsim base	0	514	191	318	229	626	1833	0	495	205	0	0	0	0	0	0	0	0	0	10036	2569	0	3581	1357	0	0	0	0	0	0	0	0	0	0	0	0	0	0	0	0	0	0	0	0	0	0	0	0	0
r1-1_dsi base	0	225	0	0	3460	38	437	0	2172	1183	0	0	0	0	0	0	0	0	0	3970	0	0	3241	0	0	0	0	0	0	0	0	0	0	0	0	88	0	0	0	0	0	0	0	0	0	0	0	0	0
gypsy15_dya base	45	1364	0	0	0	0	5366	0	144	0	0	0	0	0	0	0	0	0	0	3479	11381	0	0	0	0	0	0	0	58	0	0	0	0	0	0	444	0	0	0	0	0	0	0	0	0	0	0	0	0
gypsy-7_dse base	0	881	0	0	0	183	258	0	0	176	0	0	0	0	0	0	0	0	0	0	4818	0	288	10621	0	0	0	0	94	0	0	0	0	0	0	0	0	0	0	0	0	0	0	0	0	0	0	0	0
dm412b base	0	401	0	412	0	922	2665	0	1082	0	0	0	0	0	0	0	0	0	0	4803	1760	0	482	0	0	0	0	0	2492	0	0	0	0	0	0	0	0	0	0	0	0	0	0	0	0	0	0	0	0
gypsy4_dya base	0	2939	4429	0	0	5276	2933	0	1282	2030	0	0	0	0	0	0	0	0	0	1005	1452	0	0	1452	0	0	0	0	0	0	0	0	0	0	0	0	0	0	0	0	0	0	0	0	0	0	0	0	0
gypsy11_dya base	0	0	1344	0	351	3222	386	0	1018	342	0	0	0	0	0	0	0	0	0	284	13618	0	1028	280	0	0	0	0	1006	0	0	0	0	0	0	0	0	0	0	0	0	0	0	0	0	0	0	0	0
gypsy-3_dsim base	0	3408	876	870	0	6281	1140	0	0	2175	0	0	0	0	0	0	0	0	0	1464	1230	0	0	1668	0	0	0	0	327	0	0	0	0	0	0	0	0	0	0	0	0	0	0	0	0	0	0	0	0
sat-1_del base	145	916	0	0	0	0	0	0	0	0	0	0	0	0	0	0	0	0	0	0	0	0	0	0	0	0	0	0	344	0	0	0	0	0	0	0	0	0	0	0	0	0	0	0	0	0	0	0	0
gypsy-20_dbp base	0	1863	0	0	0	167	0	0	0	18352	0	0	0	0	100	0	0	0	0	0	0	0	0	0	0	0	0	0	0	0	0	0	0	0	0	0	0	0	0	0	0	0	0	0	0	0	0	0	0
gypsy-10_dsim base	0	0	0	0	0	1287	0	0	0	0	0	0	0	0	0	0	0	0	0	0	82	0	0	7315	0	0	0	0	0	0	0	0	0	0	0	0	0	0	0	0	0	0	0	0	0	0	0	0	0
jockey-1_dk base	125	2740	1026	0	0	1244	4272	0	1174	3858	0	0	0	0	0	0	0	0	0	2667	2689	0	0	0	0	0	0	0	0	0	0	0	0	0	0	266	0	0	0	0	0	0	0	0	0	0	0	0	0
bel1_dv base	0	1178	0	0	0	564	4511	0	2190	700	0	0	0	0	0	0	0	0	0	2758	0	0	2844	0	0	0	0	0	0	0	0	0	0	0	0	0	0	0	0	0	0	0	0	0	0	0	0	0	0
gypsy16_dya base	0	2904	0	1012	29	3480	516	0	2016	0	0	0	0	0	0	0	0	0	0	156	0	0	7265	0	0	0	0	0	0	0	0	0	0	0	0	305	0	0	0	0	0	0	0	0	0	0	0	0	0
gypsy-4_drh base	52	890	0	71	0	1190	0	0	0	1008	0	0	0	0	0	0	0	0	0	372	7460	0	145	0	0	0	0	0	103	0	0	0	0	0	0	0	0	0	0	0	0	0	0	0	0	0	0	0	0
helitron-1_deu base	2307	1014	136	0	0	112	3026	0	254	419	0	0	0	0	0	0	0	0	0	3033	332	0	693	222	0	0	0	0	2987	0	0	0	0	0	0	2419	0	0	0	0	0	0	0	0	0	0	0	0	0
gypsy-6_deu base	655	630	3961	0	0	972	2384	0	1502	501	0	0	0	0	0	0	0	0	0	900	296	0	0	0	0	0	0	0	1054	0	0	0	0	0	0	0	0	0	0	0	0	0	0	0	0	0	0	0	0
frogger base	0	2483	0	0	0	1695	0	0	9384	0	0	0	0	0	0	0	0	0	0	0	0	0	5886	0	0	0	0	0	0	0	0	0	0	0	0	0	0	0	0	0	0	0	0	0	0	0	0	0	0
gypsy-1_drh base	0	1068	140	0	825	1272	2812	0	1125	0	0	0	0	0	0	0	0	0	0	834	0	0	2972	0	0	0	0	0	0	0	0	0	0	0	0	0	0	0	0	0	0	0	0	0	0	0	0	0	0
heta_dsi base	0	0	0	0	0	0	0	0	5286	0	0	0	0	0	0	0	0	0	0	0	0	0	623	0	0	0	0	0	0	0	0	0	0	0	0	0	0	0	0	0	0	0	0	0	0	0	0	0	0
gypsy7_dya base	254	0	8696	205	0	0	409	0	2864	0	0	0	0	0	0	0	0	0	0	294	0	0	5032	0	0	0	0	0	277	0	0	0	0	0	0	0	0	0	0	0	0	0	0	0	0	0	0	0	0
copia-3_dbp base	0	2343	0	0	0	964	4361	0	0	0	0	0	0	0	0	0	0	0	0	664	0	0	4289	0	0	0	0	0	0	0	0	0	0	0	0	0	0	0	0	0	0	0	0	0	0	0	0	0	0
helitron-n2_dbi base	2028	943	0	148	0	0	2556	0	0	0	0	0	0	0	0	0	0	0	0	2577	0	0	256	0	0	0	0	0	4793	0	0	0	0	0	0	2337	0	0	0	0	0	0	0	0	0	0	0	0	0
gypsy11 base	51	789	0	0	0	3290	629	0	1113	5214	0	0	0	0	0	0	0	0	0	1819	0	0	621	0	0	0	0	0	47	0	0	0	0	0	0	0	0	0	0	0	0	0	0	0	0	0	0	0	0
dna3-1_df base	0	2957	0	0	0	0	1646	0	205	1061	0	0	0	0	0	0	0	0	0	997	196	0	770	0	0	0	0	0	1445	0	0	0	0	0	0	4492	0	0	0	0	0	0	0	0	0	0	0	0	0
gypsy-16_drh base	0	3514	0	2236	0	0	214	0	1149	1109	0	0	0	0	0	0	0	0	0	2469	0	0	0	0	0	0	0	0	72	0	0	0	0	0	0	0	0	0	0	0	0	0	0	0	0	0	0	0	0
bel-3_dfi base	0	0	0	0	0	1569	2499	0	1336	1444	0	0	0	905	0	0	0	0	0	559	0	0	3375	0	0	0	0	0	0	0	0	0	0	0	0	0	0	0	0	0	0	0	0	0	0	0	0	0	0
transib4 base	0	3021	0	0	0	0	5372	0	5538	1568	0	0	0	0	0	0	0	0	0	970	0	0	0	0	0	0	0	0	0	0	0	0	0	0	0	0	0	0	0	0	0	0	0	0	0	0	0	0	0
bel2_dya base	141	0	0	1576	3183	2231	1880	0	0	6352	0	0	0	0	0	0	0	0	0	1845	0	0	0	0	0	0	0	0	0	0	0	0	0	0	0	0	0	0	0	0	0	0	0	0	0	0	0	0	0
bel-14_dp base	0	110	0	112	522	839	3042	0	0	0	0	0	0	0	0	0	0	0	0	4321	1097	0	4008	1539	0	0	0	0	0	0	0	0	0	0	0	0	0	0	0	0	0	0	0	0	0	0	0	0	0
rep-2_dta base	2247	1546	0	0	0	0	2763	0	0	0	0	0	0	0	0	0	0	0	0	1333	0	0	0	0	0	0	0	0	3049	0	0	0	0	0	0	2633	0	0	0	0	0	0	0	0	0	0	0	0	0
bel-3_dya base	0	1690	1088	0	341	5044	213	0	6418	0	0	0	0	0	0	0	0	0	0	1211	0	0	288	0	0	0	0	0	52	0	0	0	0	0	0	81	0	0	0	0	0	0	0	0	0	0	0	0	0
mariner-17_dk base	0	3372	0	0	0	517	2064	0	0	114	0	0	0	0	0	0	0	0	0	1125	1522	0	0	0	0	0	0	0	3676	0	0	0	0	0	0	777	0	0	0	0	0	0	0	0	0	0	0	0	0
gypsy-29_dya base	0	5489	0	885	0	0	125	0	0	1156	0	0	0	0	0	0	0	0	0	450	0	0	0	0	0	0	0	0	238	0	0	0	0	0	0	0	0	0	0	0	0	0	0	0	0	0	0	0	0
bel-4_dya base	32	0	0	0	0	5667	8426	0	1273	0	0	0	0	0	0	0	0	0	0	0	0	0	0	173	0	0	0	0	51	0	0	0	0	0	0	0	0	0	0	0	0	0	0	0	0	0	0	0	0
invader5 base	0	7284	480	0	0	1203	0	0	0	0	0	0	0	0	0	0	0	0	0	188	0	0	0	0	0	0	0	0	0	0	0	0	0	0	0	0	0	0	0	0	0	0	0	0	0	0	0	0	0
copia-2_dper base	0	1451	0	0	2641	2623	5961	0	0	0	0	0	0	0	0	0	0	0	0	0	2761	0	0	0	0	0	0	0	0	0	0	0	0	0	0	0	0	0	0	0	0	0	0	0	0	0	0	0	0
gypsy18_dya base	0	1454	0	0	0	3564	0	0	520	0	0	0	0	0	0	0	0	0	0	290	5031	0	0	0	0	0	0	0	255	0	0	0	0	0	0	0	0	0	0	0	0	0	0	0	0	0	0	0	0
gypsy-13_dvir base	0	705	0	0	0	0	0	0	0	5633	0	0	0	0	0	0	0	0	0	0	0	0	0	0	0	0	0	0	0	0	0	0	0	0	0	0	0	0	0	0	0	0	0	0	0	0	0	0	0
dmltr5 base	2128	216	0	0	0	509	532	0	227	0	0	0	0	0	0	0	0	0	0	0	7664	0	532	0	0	0	0	0	1064	0	0	0	0	0	0	0	0	0	0	0	0	0	0	0	0	0	0	0	0
transib1 base	0	514	0	0	0	885	3875	0	1959	3012	0	0	0	0	0	0	0	0	0	297	2079	0	1873	0	0	0	0	0	0	0	0	0	0	0	0	0	0	0	0	0	0	0	0	0	0	0	0	0	0
gypsy-13_drh base	0	7993	0	0	277	243	1237	0	2050	874	0	0	0	0	0	0	0	0	0	959	238	0	735	0	0	0	0	0	0	0	0	0	0	0	0	0	0	0	0	0	0	0	0	0	0	0	0	0	0
bel-1_drh base	0	119	0	0	1863	1390	6853	0	229	138	0	0	0	0	0	0	0	0	0	741	0	0	3096	0	0	0	0	0	0	0	0	0	0	0	0	0	0	0	0	0	0	0	0	0	0	0	0	0	0
gypsy-14_dbi base	0	0	0	0	0	0	642	0	0	0	0	0	0	0	0	0	0	0	0	0	0	0	0	0	0	0	0	0	50	0	0	0	0	0	0	0	0	0	0	0	0	0	0	0	0	0	0	0	0
transib-4_dbp base	0	107	0	165	0	0	0	0	0	0	0	0	0	0	0	0	0	0	0	0	4900	0	0	8218	0	0	0	0	312	0	0	0	0	0	0	0	0	0	0	0	0	0	0	0	0	0	0	0	0
harbinger1_dya base	0	2057	0	1028	612	1565	970	0	304	1471	0	0	0	0	0	0	0	0	0	1231	1427	0	0	628	0	0	0	0	0	0	0	0	0	0	0	846	0	0	0	0	0	0	0	0	0	0	0	0	0
mariner-15_dk base	555	3009	0	0	0	0	2422	0	0	0	0	0	0	0	0	0	0	0	0	1555	192	0	872	0	0	0	0	0	1418	0	0	0	0	0	0	1555	0	0	0	0	0	0	0	0	0	0	0	0	0
gypsy-22_dwil base	527	0	0	0	0	0	1122	0	0	2072	0	0	0	0	0	0	0	0	0	1203	66	0	0	0	0	0	0	0	1688	0	0	0	0	0	0	0	0	0	0	0	0	0	0	0	0	0	0	0	0
r1_dya base	796	0	80	0	0	0	1432	0	0	130	0	0	0	0	0	0	0	0	0	2014	0	0	37	0	0	0	0	0	2257	0	0	0	0	0	0	0	0	0	0	0	0	0	0	0	0	0	0	0	0
dmrp1 base	1906	0	0	105	0	0	1609	0	0	0	0	0	0	0	0	0	0	0	0	3187	0	0	0	0	0	0	0	0	3741	0	0	0	0	0	0	307	0	0	0	0	0	0	0	0	0	0	0	0	0
xdmr_dm base	228	0	0	0	0	0	73	0	0	0	0	0	0	0	0	0	0	0	0	0	0	685	244	0	0	0	0	0	2201	0	0	0	0	0	0	0	355	0	0	0	0	0	0	0	0	0	0	0	0
helitron-n2_dt base	1090	556	0	0	0	72	2451	0	0	0	0	0	0	0	0	0	0	0	0	3340	0	0	0	0	0	0	0	0	2415	0	0	0	0	0	0	1892	0	0	0	0	0	0	0	0	0	0	0	0	0
gypsy-6_drh base	0	59	0	0	0	237	1136	0	9919	478	0	0	0	0	0	0	0	0	0	0	0	0	102	0	0	0	0	0	187	0	0	0	0	0	0	294	0	0	0	0	0	0	0	0	0	0	0	0	0
r1-5_dya base	0	1318	830	0	0	731	840	0	1138	1615	0	0	0	0	0	0	0	0	0	248	0	0	341	0	0	0	0	0	0	0	0	0	0	0	0	0	0	0	0	0	0	0	0	0	0	0	0	0	0
gypsy-8_dbi base	0	3364	0	0	0	0	0	0	0	0	0	0	0	0	0	0	0	0	0	0	0	0	0	0	0	0	0	0	0	0	0	0	0	0	0	0	0	0	0	0	0	0	0	0	0	0	0	0	0
jockey-5_dper base	341	0	0	1274	0	0	119	0	0	0	0	0	0	0	0	0	0	0	0	0	6723	0	0	0	0	0	0	0	211	0	0	0	0	0	0	0	0	0	0	0	0	0	0	0	0	0	0	0	0
hoyak2 base	1195	1876	0	0	0	0	1423	0	0	0	0	0	0	0	0	0	0	0	0	1179	0	0	0	0	0	0	0	0	1622	0	0	0	0	0	0	1924	0	0	0	0	0	0	0	0	0	0	0	0	0
gypsy-15_del base	0	1335	0	0	202	1768	926	0	905	0	0	0	0	0	0	0	0	0	0	4712	0	0	1360	0	0	0	0	0	517	0	0	0	0	0	0	0	0	0	0	0	0	0	21	0	0	0	0	0	0
gypsy-7_dbi base	55	0	2646	0	0	0	0	0	0	0	0	0	0	0	0	0	0	0	0	2984	1115	0	635	0	0	0	0	0	56	0	0	0	0	0	0	0	0	0	0	0	0	0	0	0	0	0	0	0	0
looper1_dm base	0	0	0	0	0	666	1881	0	0	0	0	0	0	0	0	0	0	0	0	2102	376	0	1518	376	0	0	0	0	1130	0	0	0	0	0	0	0	0	0	0	0	0	0	0	0	0	0	0	0	0
het-a3_dvi base	797	112	0	0	0	0	1615	0	0	0	0	0	0	0	0	0	0	0	0	1419	0	0	0	0	0	0	0	0	1941	0	0	0	0	0	0	60	0	0	0	0	0	0	0	0	0	0	0	0	0
gypsy8_dya base	0	0	0	0	0	716	1514	0	910	0	0	0	0	0	0	0	0	0	0	569	67	0	885	0	0	0	0	0	376	0	0	0	0	0	0	0	0	0	0	0	0	0	0	0	0	0	0	0	0
gypsy-5_dki base	0	0	0	0	0	1248	3215	0	596	0	0	0	0	0	0	0	0	0	0	0	168	0	4859	897	0	0	0	0	0	0	0	0	0	0	0	0	0	0	0	0	0	0	0	0	0	0	0	0	0
gypsy-1_dan base	213	0	0	0	0	0	0	0	0	0	0	0	0	0	0	0	0	0	0	0	0	0	1427	9331	0	0	0	0	0	0	0	0	0	0	0	0	0	0	0	0	0	0	0	0	0	0	0	0	0
gypsy-12_drh base	294	0	0	0	0	0	1828	0	0	1983	0	0	0	0	0	0	0	0	0	99	619	0	0	0	0	0	0	0	0	0	0	0	0	0	0	0	0	0	0	0	0	0	0	0	0	0	0	0	0
homo6 base	1447	0	0	0	0	0	1531	0	0	0	0	0	0	0	0	0	0	0	0	1755	0	0	0	0	0	0	0	0	1193	0	0	0	0	0	0	0	0	0	0	0	0	0	0	0	0	0	0	0	0
dmtom1 base	0	0	0	0	0	410	820	0	4308	411	0	0	0	0	0	0	0	0	0	403	0	0	772	0	0	0	0	0	0	0	0	0	0	0	0	0	0	0	0	0	0	0	0	0	0	0	0	0	0
helitron-n1_del base	1178	433	0	0	0	0	1282	0	172	50	0	0	0	0	0	0	0	0	0	1997	0	0	0	0	0	0	0	0	3768	0	0	0	0	0	0	802	0	0	0	0	0	0	0	0	0	0	0	0	0
gypsy-2_dper base	0	0	0	0	0	6222	0	0	578	0	0	0	0	0	0	0	0	0	0	1657	0	0	0	0	0	0	0	0	0	0	0	0	0	0	0	0	0	0	0	0	0	0	0	0	0	0	0	0	0
gypsy-12_dfi base	0	2072	0	314	0	0	205	0	802	1967	0	0	0	0	0	0	0	0	0	999	0	0	0	0	0	0	0	0	0	0	0	0	0	0	0	0	0	0	0	0	0	0	0	0	0	0	0	0	0
gypsy-23_dya base	0	0	0	0	0	518	0	0	0	0	0	0	0	0	0	0	0	0	0	0	818	0	684	3741	0	0	0	0	381	0	0	0	0	0	0	0	0	0	0	0	0	0	0	0	0	0	0	0	0
gypsy-7_dfi base	86	1309	1985	0	0	0	77	0	6174	0	0	0	0	0	0	0	0	0	0	239	295	0	0	0	0	0	0	0	81	0	0	0	0	0	0	0	0	0	0	0	0	0	0	0	0	0	0	0	0
gypsy-34_del base	0	4179	0	91	0	4483	629	0	0	0	0	0	0	0	0	0	0	0	0	0	0	0	492	0	0	0	0	0	0	0	0	0	0	0	0	0	0	0	0	0	0	0	0	0	0	0	0	0	0
bel-11_del base	47	0	0	0	1949	968	2692	0	779	3211	0	0	0	0	0	0	0	0	0	316	0	0	0	0	0	0	0	0	0	0	0	0	0	0	0	0	0	0	0	0	0	0	0	0	0	0	0	0	0
copia-1_dvir base	669	0	0	0	0	9172	0	0	0	0	0	0	0	0	0	0	0	0	0	0	0	0	0	0	0	0	0	0	0	0	0	0	0	0	0	0	0	0	0	0	0	0	0	0	0	0	0	0	0
stalker3 base	0	0	0	372	0	0	0	0	1488	58	0	0	0	0	0	0	0	0	0	0	2575	0	0	0	0	0	0	0	0	0	0	0	0	0	0	0	0	0	0	0	0	0	0	0	0	0	0	0	0
transib-n1_dm base	1413	501	0	0	0	0	554	0	0	0	0	0	0	0	0	0	0	0	0	1886	210	0	0	300	0	0	0	0	491	0	0	0	0	0	0	295	0	0	0	0	0	0	0	0	0	0	0	0	0
ars406_dm base	119	0	0	0	0	0	100	0	0	0	0	0	0	0	0	0	0	0	0	0	625	253	0	0	0	0	0	0	318	0	0	0	0	0	0	0	0	0	43	0	0	0	0	0	0	0	0	0	0
gypsy-32_del base	0	0	2674	0	0	4218	502	0	0	0	0	0	0	0	0	0	0	0	0	69	339	0	572	0	0	0	0	0	1249	0	0	0	0	0	0	0	0	0	0	0	0	0	0	0	0	0	0	0	0
jockey-5_dya base	558	2095	0	0	362	0	0	0	0	0	0	0	0	2182	2239	0	0	0	0	0	0	0	0	0	0	0	0	0	0	0	0	0	0	0	0	0	0	0	0	0	0	0	0	0	0	0	0	0	0
gypsy-9_del base	0	33	0	568	0	148	143	0	82	38	0	0	0	0	0	0	0	0	0	43	1739	0	62	248	0	0	0	0	0	0	0	0	0	0	0	221	0	0	0	0	0	0	0	0	0	0	0	0	0
mariner-20_dan base	1221	921	0	0	0	0	1793	0	206	0	0	0	0	0	0	0	0	0	0	1417	0	0	365	0	0	0	0	0	193	0	0	0	0	0	0	1015	0	0	0	0	0	0	0	0	0	0	0	0	0
jockey-1_dsi base	0	0	0	0	0	1245	0	0	0	0	0	0	0	0	0	0	0	0	0	0	0	0	0	0	0	0	0	0	0	0	0	0	0	0	0	0	0	0	0	0	0	0	0	0	1031	0	0	0	0
i-6_dy base	156	2970	0	2363	0	0	2664	0	0	0	0	0	0	0	0	0	0	0	0	736	0	0	0	0	0	0	0	0	183	0	0	0	0	0	0	0	0	0	0	0	0	0	0	0	0	0	0	0	0
helitron-1_dt base	1508	365	0	0	0	616	1598	0	0	0	0	0	0	0	0	0	0	0	0	1003	0	0	218	0	0	0	0	0	1157	0	0	0	0	0	0	811	0	0	0	0	0	0	0	0	0	0	0	0	0
gypsy-2_dan base	0	4332	0	0	0	819	1541	0	1256	0	0	0	0	0	0	0	0	0	0	774	0	0	0	0	0	0	0	0	0	0	0	0	0	0	0	0	0	0	0	0	0	0	0	0	0	0	0	0	0
gypsy-24_del base	275	0	0	0	0	504	111	0	1340	1358	0	0	0	0	0	0	0	0	0	3863	0	0	0	0	0	0	0	0	0	0	0	0	0	0	0	527	0	0	0	0	0	0	0	0	0	0	0	0	0
helitron-n2_del base	622	840	0	0	143	115	1518	0	442	166	0	0	0	0	0	0	0	0	0	1653	129	0	269	0	0	0	0	0	892	0	0	0	0	0	0	847	0	0	0	0	0	0	0	0	0	0	0	0	0
gypsy-20_del base	0	873	0	218	0	0	103	0	0	0	0	0	0	0	0	0	0	0	0	0	1716	0	2085	3677	0	0	0	0	0	0	0	0	0	0	0	0	0	0	0	0	0	0	0	0	0	0	0	0	0
bari1 base	202	2326	42	0	0	0	1715	0	205	0	0	0	0	0	0	0	0	0	0	42	0	0	0	0	0	0	0	0	729	0	0	0	0	0	0	1238	0	0	0	0	0	0	0	0	0	0	0	0	0
gypsy-11_dfi base	0	80	1139	0	72	0	0	0	3160	0	0	0	0	0	0	0	0	0	0	351	0	0	2755	0	0	0	0	0	0	0	0	0	0	0	0	0	0	0	0	0	0	0	0	0	0	0	0	0	0
mariner-7_dya base	146	0	0	0	0	0	813	0	0	0	0	0	0	0	0	0	0	0	0	313	0	0	0	0	0	0	0	0	122	0	0	0	0	0	0	0	0	0	0	0	0	0	0	0	0	0	0	0	0
gypsy-24_dbp base	0	1243	0	0	0	0	0	0	0	0	0	0	0	1881	2448	0	0	0	0	0	0	0	0	616	0	0	0	0	0	0	0	0	0	0	0	0	0	0	0	0	0	0	0	0	0	0	0	0	0
i-4_dbp base	0	0	1824	0	0	3652	0	0	886	0	0	0	0	0	0	0	0	0	0	434	0	0	0	0	0	0	0	0	0	0	0	0	0	0	0	517	0	0	0	0	0	0	0	0	0	0	0	0	0
gypsy-25_del base	0	1620	0	0	583	638	903	0	585	63	0	0	0	0	0	0	0	0	0	1361	0	0	1298	0	0	0	0	0	0	0	0	0	0	0	0	0	0	0	0	0	0	0	0	0	0	0	0	0	0
minime_dn base	762	363	0	0	0	0	1182	0	379	237	0	0	0	0	0	0	0	0	0	999	0	0	242	0	0	0	0	0	1170	0	0	0	0	0	0	424	0	0	0	0	0	0	0	0	0	0	0	0	0
hat-n1b_dbp base	680	589	0	0	0	0	772	0	218	0	0	0	0	0	0	0	0	0	0	1658	112	0	153	112	0	0	0	0	725	0	0	0	0	0	0	631	0	0	0	0	0	0	0	0	0	0	0	0	0
hat-1_dsi base	0	509	0	0	0	712	2645	0	0	0	0	0	0	0	0	0	0	0	0	206	1675	0	552	0	0	0	0	0	0	0	0	0	0	0	0	356	0	0	0	0	0	0	0	0	0	0	0	0	0
gypsy-2_drh base	0	0	0	0	0	454	4707	0	115	0	0	0	0	0	0	0	0	0	0	399	0	0	441	0	0	0	0	0	0	0	0	0	0	0	0	0	0	0	0	0	0	0	0	0	0	0	0	0	0
bel-19_dan base	0	0	0	0	0	0	4285	0	0	543	0	0	0	0	0	0	0	0	0	0	0	0	0	0	0	0	0	0	0	0	0	0	0	0	0	0	0	0	0	0	0	0	0	0	0	0	0	0	0
galileo_dm base	700	117	0	0	0	0	1179	0	0	0	0	0	0	0	0	0	0	0	0	842	0	0	0	0	0	0	0	0	1036	0	0	0	0	0	0	31	0	0	0	0	0	0	0	0	0	0	0	0	0
r1-1_dya base	0	947	0	0	0	0	0	0	2486	3274	0	0	0	0	0	0	0	0	0	0	0	0	0	0	0	0	0	0	0	0	0	0	0	0	0	0	0	0	0	0	0	0	0	0	0	0	0	0	0
helitron-1_dyak base	0	1018	0	0	0	110	0	0	527	0	0	0	0	0	0	0	0	0	0	2742	0	0	1580	0	0	0	0	0	254	0	0	0	0	0	0	188	0	0	0	0	0	0	0	0	0	0	0	0	0
dnarep2_dsim base	282	461	0	0	0	464	1351	0	0	0	0	0	0	0	0	0	0	0	0	1036	0	0	43	0	0	0	0	0	391	0	0	0	0	0	0	1017	0	0	0	0	0	0	0	0	0	0	0	0	0
helitron-2_drh base	738	106	56	0	0	0	987	0	0	0	0	0	0	0	0	0	0	0	0	2330	0	0	43	0	0	0	0	0	643	0	0	0	0	0	0	313	0	0	0	0	0	0	0	0	0	0	0	0	0
gypsy-8_dvir base	0	157	0	0	0	2181	0	0	0	0	0	0	0	0	0	0	0	0	0	4283	0	0	0	0	0	0	0	0	0	0	0	0	0	0	0	0	0	0	0	0	0	0	0	0	0	0	0	0	0
copia-1_dfi base	0	0	0	0	0	880	846	0	0	0	0	0	0	0	0	0	0	0	0	0	0	0	0	0	0	0	0	0	208	0	0	0	0	0	0	0	0	0	0	0	0	0	0	0	0	0	0	0	0
nof_fb base	0	0	0	0	0	0	4431	0	0	233	0	0	0	0	0	0	0	0	0	1433	0	0	0	0	0	0	0	0	146	0	0	0	0	0	0	0	0	0	0	0	0	0	0	0	0	0	0	0	0
gypsy-25_dya base	0	0	0	0	0	0	0	0	1560	0	0	0	0	379	0	0	0	0	0	0	0	0	0	0	0	0	0	0	0	0	0	0	0	0	0	0	0	0	0	0	0	0	0	0	0	0	0	0	0
gypsy-8_dse base	292	0	18	0	0	917	2321	0	0	2277	0	0	0	0	0	0	0	0	0	86	0	0	0	0	0	0	0	0	75	0	0	0	0	0	0	0	0	0	0	0	0	0	0	0	0	0	0	0	0
jockey-9_dy base	203	0	0	0	0	0	2006	0	0	0	0	0	0	0	0	0	0	0	0	741	0	0	0	0	0	0	0	0	53	0	0	0	0	0	0	0	0	0	0	0	0	0	0	0	0	0	0	0	0
bel-3_del base	169	0	0	0	0	805	1670	0	0	0	0	0	0	0	0	0	0	0	0	0	0	0	791	0	0	0	0	0	194	0	0	0	0	0	0	0	0	0	0	0	0	0	0	0	0	0	0	0	0
gypsy-6_dper base	85	0	288	0	287	0	0	0	432	2544	0	0	0	0	0	0	0	0	0	0	189	0	0	0	0	0	0	0	0	0	0	0	0	0	0	0	0	0	0	0	0	0	0	0	0	0	0	0	0
gypsy5_dya base	0	0	0	0	0	3018	0	0	1994	0	0	0	0	0	0	0	0	0	0	500	0	0	0	0	0	0	0	0	0	0	0	0	0	0	0	0	0	0	0	0	0	0	0	0	0	0	0	0	0
minos base	0	0	0	0	0	0	2297	0	549	1362	0	0	0	0	0	0	0	0	0	977	0	0	0	0	0	0	0	0	381	0	0	0	0	0	0	0	0	0	0	0	0	0	0	0	0	0	0	0	0
gypsy13_dpse base	0	170	0	0	0	0	0	0	0	5268	0	0	0	0	0	0	0	0	0	0	0	0	0	0	0	0	0	0	0	0	0	0	0	0	0	0	0	0	0	0	0	0	0	0	0	0	0	0	0
gypsy10_dya base	0	0	1035	0	3476	0	184	0	0	0	0	0	0	0	0	0	0	0	0	0	0	0	0	0	0	0	0	0	0	0	0	0	0	0	0	0	0	0	0	0	0	0	0	0	0	0	0	0	0
jockey-4b_dvi base	0	1227	0	1377	0	0	263	0	0	0	0	0	0	0	0	0	0	0	0	1478	1368	0	0	0	0	0	0	0	0	0	0	0	0	0	0	0	0	0	0	0	0	0	0	0	0	0	0	0	0
bel-13_dp base	0	0	0	0	0	0	0	0	1374	85	0	0	0	0	0	0	0	0	0	0	0	0	607	0	0	0	0	0	0	0	0	0	0	0	0	0	0	0	0	0	0	0	0	0	0	0	0	0	0
gypsy13_dya base	0	0	0	0	0	0	0	0	5309	0	0	0	0	0	0	0	0	0	0	0	0	0	0	0	0	0	0	0	0	0	0	0	0	0	0	0	0	0	0	0	0	0	0	0	0	0	0	0	0
mariner-4_dbp base	0	364	0	0	0	0	1513	0	0	0	0	0	0	0	0	0	0	0	0	2988	742	0	0	0	0	0	0	0	0	0	0	0	0	0	0	0	0	0	0	0	0	0	0	0	0	0	0	0	0
gypsy-6_dgri base	0	2256	0	0	0	0	0	0	611	105	0	0	0	0	0	0	0	0	0	376	0	0	2241	0	0	0	0	0	0	0	0	0	0	0	0	0	0	0	0	0	0	0	0	0	0	0	0	0	0
gypsy-2_dta base	0	0	0	0	0	0	1020	0	0	0	0	0	0	0	0	0	0	0	0	1864	0	0	2585	0	0	0	0	0	86	0	0	0	0	0	0	0	0	0	0	0	0	0	0	0	0	0	0	0	0
bel-5_dwil base	0	2792	0	731	0	0	0	0	0	0	0	0	0	0	0	0	0	0	0	0	1951	0	0	0	0	0	0	0	0	0	0	0	0	0	0	0	0	0	0	0	0	0	0	0	0	0	0	0	0
mariner-17_dan base	377	0	0	0	0	0	2403	0	0	0	0	0	0	0	0	0	0	0	0	0	0	0	0	0	0	0	0	0	0	0	0	0	0	0	0	0	0	0	0	0	0	0	0	0	0	0	0	0	0
bel-12_del base	0	0	0	0	0	800	3765	0	0	0	0	0	0	0	0	0	0	0	0	569	0	0	332	0	0	0	0	0	0	0	0	0	0	0	0	0	0	0	0	0	0	0	0	0	0	0	0	0	0
bel-4_del base	89	60	130	0	551	338	2999	0	0	0	0	0	0	0	0	0	0	0	0	540	0	0	693	0	0	0	0	0	60	0	0	0	0	0	0	0	0	0	0	0	0	0	0	0	0	0	0	0	0
pogon1 base	1116	0	0	0	0	0	558	0	0	0	0	0	0	0	0	0	0	0	0	930	0	0	0	0	0	0	0	0	1302	0	0	0	0	0	0	0	0	0	0	0	0	0	0	0	0	0	0	0	0
cr1-2_df base	128	234	0	789	0	158	1351	0	144	172	0	0	0	0	0	0	0	0	0	43	0	0	76	0	0	0	0	0	836	0	0	0	0	0	0	490	0	0	0	0	0	0	0	0	0	0	0	0	0
jockey-10_drh base	0	0	0	0	0	135	1994	0	797	1117	0	0	0	0	0	0	0	0	0	116	0	0	1052	0	0	0	0	0	0	0	0	0	0	0	0	139	0	0	0	0	0	0	0	0	0	0	0	0	0
jockey-10_dbp base	0	1430	0	1862	0	0	0	0	0	0	0	0	0	0	0	0	0	0	0	0	0	0	0	0	0	0	0	0	0	0	0	0	0	0	0	0	0	0	0	0	0	0	0	0	0	0	0	0	0
bel-15_del base	0	0	0	0	0	2103	1048	0	0	443	0	0	0	0	0	0	0	0	0	349	1338	0	0	0	0	0	0	0	0	0	0	0	0	0	0	0	0	0	0	0	0	0	0	0	0	0	0	0	0
gypsy-18_del base	0	0	0	0	0	0	0	0	0	0	0	0	0	0	0	0	0	0	0	4959	0	0	0	0	0	0	0	0	227	0	0	0	0	0	0	0	0	0	0	0	0	0	0	0	0	0	0	0	0
bel-21_dwil base	376	44	0	0	0	0	592	0	0	0	0	0	0	0	0	0	0	0	0	874	0	0	0	0	0	0	0	0	784	0	0	0	0	0	0	0	0	0	0	0	0	0	0	0	0	0	0	0	0
gypsy-17_drh base	0	0	0	0	0	0	675	0	0	0	0	0	0	0	0	0	0	0	0	4022	0	0	0	0	0	0	0	0	0	0	0	0	0	0	0	467	0	0	0	0	0	0	0	0	0	0	0	0	0
helitron-2_dvir base	890	0	0	0	0	0	751	0	0	0	0	0	0	0	0	0	0	0	0	1226	0	0	0	0	0	0	0	0	724	0	0	0	0	0	0	419	0	0	0	0	0	0	0	0	0	0	0	0	0
helena_rt base	414	0	0	0	0	0	1559	0	0	888	0	0	0	0	0	0	0	0	0	0	0	0	356	0	0	0	0	0	177	0	0	0	0	0	0	0	0	0	0	0	0	0	0	0	0	0	0	0	0
gypsy3_dya base	0	0	0	0	0	0	2887	0	1007	0	0	0	0	0	0	0	0	0	0	1121	0	0	0	0	0	0	0	0	0	0	0	0	0	0	0	0	0	0	0	0	0	0	0	0	0	0	0	0	0
gypsy-6_dbi base	0	0	0	2595	0	0	294	0	0	0	0	0	0	0	0	0	0	0	0	0	1706	0	0	0	0	0	0	0	59	0	0	0	0	0	0	0	0	0	0	0	0	0	0	0	0	0	0	0	0
gypsy-15_drh base	0	164	0	0	0	161	1032	0	0	232	0	0	0	0	0	0	0	0	0	2902	233	0	0	0	0	0	0	0	157	0	0	0	0	0	0	0	0	0	0	0	0	0	0	0	0	0	0	0	0
gypsy-13_dfi base	0	0	0	0	0	0	0	0	4337	0	0	0	0	0	0	0	0	0	0	609	0	0	0	0	0	0	0	0	0	0	0	0	0	0	0	0	0	0	0	0	0	0	0	0	0	0	0	0	0
mudr-1_dk base	51	273	0	0	1052	0	349	0	360	0	0	0	0	0	0	0	0	0	0	0	468	0	0	0	0	0	0	0	815	0	0	0	0	0	0	753	0	0	0	0	0	0	0	0	0	0	0	0	0
jockey-2_dgri base	199	0	0	0	0	0	601	0	0	0	0	0	0	0	0	0	0	0	0	1102	0	0	0	0	0	0	0	0	2185	0	0	0	0	0	0	0	0	0	0	0	0	0	0	0	0	0	0	0	0
gypsy-6_dta base	0	0	0	0	0	0	68	0	0	136	0	0	0	0	0	0	0	0	0	79	969	0	3540	0	0	0	0	0	0	0	0	0	0	0	0	0	0	0	0	0	0	0	0	0	0	0	0	0	0
copia-29_dp base	0	0	0	0	0	2051	0	0	0	0	0	0	0	0	0	0	0	0	0	0	0	0	0	0	0	0	0	0	62	0	0	0	0	0	0	0	0	0	0	0	0	0	0	0	0	0	0	0	0
gypsy-18_dan base	0	0	0	180	0	0	968	0	0	2250	0	0	0	0	0	0	0	0	0	0	369	0	0	0	0	0	0	0	158	0	0	0	0	0	0	0	0	0	0	0	0	0	0	0	0	0	0	0	0
gypsy-6_dfi base	0	0	0	0	0	0	857	0	0	0	0	0	0	0	0	0	0	0	0	41	0	0	0	0	0	0	0	0	0	0	0	0	0	0	0	0	0	0	0	0	0	0	0	0	0	0	0	0	0
p-1_dbp base	353	50	0	0	0	0	730	0	0	0	0	0	0	0	0	0	0	0	0	596	0	0	0	0	0	0	0	0	520	0	0	0	0	0	0	0	0	0	0	0	0	0	0	0	0	0	0	0	0
gypsy-15_dwil base	0	0	0	0	0	0	0	0	1481	0	0	0	0	0	0	0	0	0	0	2211	322	0	563	0	0	0	0	0	0	0	0	0	0	0	0	0	0	0	0	0	0	0	0	0	0	0	0	0	0
gypsy-40_dan base	0	0	0	0	0	0	0	0	0	0	0	0	0	0	0	0	0	0	0	0	0	0	173	0	0	0	0	0	0	0	0	0	0	0	0	4537	0	0	0	0	0	0	0	0	0	0	0	0	0
mariner-1_df base	569	0	0	0	0	459	208	0	0	0	0	0	0	0	0	0	0	0	0	403	0	0	0	0	0	0	0	0	0	0	0	0	0	0	0	2230	0	0	0	0	0	0	0	0	0	0	0	0	0
gypsy-22_dy base	260	0	0	0	0	0	1019	0	0	0	0	0	0	0	0	0	0	0	0	996	0	0	0	0	0	0	0	0	596	0	0	0	0	0	0	63	0	0	0	0	0	0	0	0	0	0	0	0	0
rep-1_dta base	0	1590	0	0	0	465	280	0	594	0	0	0	0	0	0	0	0	0	0	51	0	0	977	141	0	0	0	0	0	0	0	0	0	0	0	425	0	0	0	0	0	0	0	0	0	0	0	0	0
hoana5 base	172	0	0	0	0	0	828	0	0	0	0	0	0	0	0	0	0	0	0	612	0	0	0	0	0	0	0	0	377	0	0	0	0	0	0	52	0	0	0	0	0	0	0	0	0	0	0	0	0
gypsy-3_dgri base	0	0	0	0	0	0	0	0	0	0	0	0	0	0	684	0	0	0	0	0	263	0	350	775	0	0	0	0	0	0	0	0	0	0	0	0	0	0	0	0	0	0	0	0	0	0	0	0	0
r1-4_dya base	0	901	0	0	0	0	0	0	0	201	0	0	0	0	0	0	0	0	0	0	0	0	0	0	0	0	0	0	0	0	0	0	0	0	0	0	0	0	0	0	0	0	0	0	0	0	0	0	0
gypsy-2_dbp base	0	0	0	0	0	0	0	0	0	0	0	0	0	0	0	0	0	0	0	0	0	0	0	4426	0	0	0	0	0	0	0	0	0	0	0	0	0	0	0	0	0	0	0	0	0	0	0	0	0
hat-2_dse base	0	0	0	545	0	0	2182	0	418	0	0	0	0	0	0	0	0	0	0	515	0	0	0	0	0	0	0	0	545	0	0	0	0	0	0	0	0	0	0	0	0	0	0	0	0	0	0	0	0
copia-1_dwil base	0	0	0	0	0	0	630	0	0	3237	0	0	0	0	0	0	0	0	0	0	0	0	0	0	0	0	0	0	0	0	0	0	0	0	0	0	0	0	0	0	0	0	0	0	0	0	0	0	0
gypsy-24_dwil base	0	0	977	0	0	0	0	0	0	0	0	0	0	0	0	0	0	0	0	1919	744	0	0	744	0	0	0	0	0	0	0	0	0	0	0	0	0	0	0	0	0	0	0	0	0	0	0	0	0
gypsy-17_dta base	0	0	0	0	0	869	1215	0	0	0	0	0	0	0	0	0	0	0	0	0	0	0	2163	0	0	0	0	0	0	0	0	0	0	0	0	131	0	0	0	0	0	0	0	0	0	0	0	0	0
jockey-9_drh base	0	0	0	0	0	0	0	0	0	0	0	0	0	0	2919	0	0	0	0	0	0	0	1324	0	0	0	0	0	0	0	0	0	0	0	0	0	0	0	0	0	0	0	0	0	0	0	0	0	0
jockey-6_dvi base	0	273	0	0	0	876	652	0	0	516	0	0	0	0	0	0	0	0	0	78	0	0	1906	0	0	0	0	0	0	0	0	0	0	0	0	0	0	0	0	0	0	0	0	0	0	0	0	0	0
bel-4_deu base	39	1794	0	0	0	237	791	0	0	0	0	0	0	0	0	0	0	0	0	0	600	0	0	750	0	0	0	0	0	0	0	0	0	0	0	0	0	0	0	0	0	0	0	0	0	0	0	0	0
bel-6_drh base	0	454	0	0	0	757	593	0	0	1165	0	0	0	0	0	0	0	0	0	137	0	0	765	0	0	0	0	0	57	0	0	0	0	0	0	0	0	0	0	0	0	0	0	0	0	0	0	0	0
gypsy-8_dfi base	936	0	0	0	0	0	1364	0	0	0	0	0	0	0	0	0	0	0	0	189	130	0	0	0	0	0	0	0	1135	0	0	0	0	0	0	0	0	0	0	0	0	0	0	0	0	0	0	0	0
r2_dsi base	0	0	0	0	0	0	0	0	0	0	0	0	0	0	0	0	0	0	0	0	0	0	0	0	0	0	0	0	0	0	0	0	0	0	0	0	0	0	0	0	0	0	0	0	0	0	0	0	0
gypsy-3_dse base	0	1306	0	0	0	598	1286	0	858	38	0	0	0	0	0	0	0	0	0	0	0	0	0	0	0	0	0	0	0	0	0	0	0	0	0	0	0	0	0	0	0	0	0	0	0	0	0	0	0
gypsy6_dya base	0	0	0	0	211	0	0	0	2598	0	0	0	0	0	0	0	0	0	0	640	0	0	0	0	0	0	0	0	105	0	0	0	0	0	0	0	0	0	0	0	0	0	0	0	0	0	0	0	0
jockey-1_df base	0	1772	0	0	0	1736	464	0	0	0	0	0	0	0	0	0	0	0	0	0	0	0	0	0	0	0	0	0	0	0	0	0	0	0	0	0	0	0	0	0	0	0	0	0	0	0	0	0	0
gypsy-10_deu base	0	0	0	358	0	0	0	0	0	503	0	0	0	0	0	0	0	0	0	0	530	0	0	0	0	0	0	0	1223	0	0	0	0	0	0	0	0	0	0	0	0	0	0	0	0	0	0	0	0
jockey-3_dvi base	0	0	0	0	0	0	0	0	0	0	0	0	0	0	0	0	0	0	0	0	0	0	0	0	0	0	0	0	0	0	0	0	0	0	0	0	0	0	0	0	0	100	0	0	0	0	0	0	0
g7_dm base	0	0	0	0	0	496	1899	0	521	0	0	0	0	0	0	0	0	0	0	0	0	0	589	0	0	0	0	0	0	0	0	0	0	0	0	0	0	0	0	0	0	0	0	0	0	0	0	0	0
jockey-6_drh base	178	537	0	0	0	0	701	0	885	0	0	0	0	0	0	0	0	0	0	859	0	0	0	0	0	0	0	0	50	0	0	0	0	0	0	680	0	0	0	0	0	0	0	0	0	0	0	0	0
gypsy-16_dbi base	0	0	0	229	0	751	1338	0	0	0	0	0	0	0	0	0	0	0	0	1386	0	0	0	0	0	0	0	0	0	0	0	0	0	0	0	0	0	0	0	0	0	0	0	0	0	0	0	0	0
r1-2_dta base	0	0	0	814	0	0	1941	0	724	0	0	0	0	0	0	0	0	0	0	0	0	0	0	0	0	0	0	0	0	0	0	0	0	0	0	316	0	0	0	0	0	0	0	0	0	0	0	0	0
helitron-1_df base	0	0	0	0	535	0	2752	0	0	0	0	0	0	0	0	0	0	0	0	506	0	0	0	0	0	0	0	0	0	0	0	0	0	0	0	0	0	0	0	0	0	0	0	0	0	0	0	0	0
jockey-3_drh base	0	0	104	0	0	293	700	0	0	82	0	0	0	0	0	0	0	0	0	0	0	0	1852	96	0	0	0	0	0	0	0	0	0	0	0	191	0	0	0	0	0	0	0	0	0	0	0	0	0
i-7_dbi base	0	624	0	0	0	2256	657	0	0	0	0	0	0	0	0	0	0	0	0	160	0	0	0	0	0	0	0	0	0	0	0	0	0	0	0	0	0	0	0	0	0	0	0	0	0	0	0	0	0
bel-2_deu base	0	577	0	992	0	0	775	0	723	0	0	0	0	0	0	0	0	0	0	0	0	0	625	0	0	0	0	0	0	0	0	0	0	0	0	0	0	0	0	0	0	0	0	0	0	0	0	0	0
transib-6_dbp base	2317	0	0	508	0	0	160	0	0	0	0	0	0	0	0	0	0	0	0	667	0	0	0	0	0	0	0	0	0	0	0	0	0	0	0	0	0	0	0	0	0	0	0	0	0	0	0	0	0
gypsy-14_dan base	76	64	0	0	0	0	974	0	0	0	0	0	0	0	0	0	0	0	0	2214	0	0	0	0	0	0	0	0	316	0	0	0	0	0	0	0	0	0	0	0	0	0	0	0	0	0	0	0	0
mariner-12_dan base	490	101	0	0	0	0	230	0	631	0	0	0	0	0	0	0	0	0	0	1263	30	0	0	0	0	0	0	0	619	0	0	0	0	0	0	119	0	0	0	0	0	0	0	0	0	0	0	0	0
copia-3_dan base	0	0	0	0	0	0	0	0	1651	178	0	0	0	0	0	0	0	0	0	0	0	0	0	0	0	0	0	0	0	0	0	0	0	0	0	0	0	0	0	0	0	0	0	0	0	0	0	0	0
bel-2_dvir base	0	0	0	0	0	82	215	0	0	0	0	0	0	0	0	0	0	0	0	0	0	0	3279	0	0	0	0	0	0	0	0	0	0	0	0	0	0	0	0	0	0	0	0	0	0	0	0	0	0
helitron-2n1_dvir base	0	78	0	0	0	92	173	0	0	181	0	0	0	0	0	0	0	0	0	1229	0	0	0	0	0	0	0	0	698	0	0	0	0	0	0	839	0	0	0	0	0	0	0	0	0	0	0	0	0
outcast-1_del base	1076	0	0	0	0	0	752	0	0	0	0	0	0	0	0	0	0	0	0	427	0	0	0	0	0	0	0	0	432	0	0	0	0	0	0	0	0	0	0	0	0	0	0	0	0	0	0	0	0
transib-8_dan base	0	0	0	0	0	0	0	0	0	0	0	0	0	0	0	0	0	0	0	0	0	0	2215	0	0	0	0	0	1085	0	0	0	0	0	0	0	0	0	0	0	0	0	0	0	0	0	0	0	0
rehavkus-1_dy base	87	59	0	0	707	0	986	0	0	120	0	0	0	0	0	0	0	0	0	0	62	0	0	0	0	0	0	0	151	0	0	0	0	0	0	807	0	0	0	0	0	0	0	0	0	0	0	0	0
gypsy-9_dfi base	0	0	0	0	0	0	0	0	0	1402	0	0	0	0	0	0	0	0	0	0	0	0	0	0	0	0	0	0	0	0	0	0	0	0	0	0	0	0	0	0	0	0	0	0	0	0	0	0	0
r1-1_der base	54	0	0	0	0	486	0	0	429	0	0	0	0	0	0	0	0	0	0	122	0	0	1228	0	0	0	0	0	63	0	0	0	0	0	0	0	0	0	0	0	0	0	0	0	0	0	0	0	0
copia-3_deu base	0	0	0	483	0	0	1562	0	0	0	0	0	0	0	0	0	0	0	0	0	0	0	1217	0	0	0	0	0	30	0	0	0	0	0	0	0	0	0	0	0	0	0	0	0	0	0	0	0	0
jockey-2_dsim base	0	416	0	0	0	0	0	0	84	1221	0	0	0	0	0	0	0	0	0	0	0	0	0	0	0	0	0	0	0	0	0	0	0	0	0	0	0	0	0	0	0	0	0	0	0	0	0	0	0
jockey-2_drh base	64	0	0	0	0	0	0	0	1610	0	0	0	0	0	0	0	0	0	0	0	0	0	1455	0	0	0	0	0	0	0	0	0	0	0	0	0	0	0	0	0	0	0	0	0	0	0	0	0	0
gypsy1_dya base	0	0	0	0	0	0	964	0	0	0	0	0	0	0	0	0	0	0	0	295	0	0	1883	0	0	0	0	0	0	0	0	0	0	0	0	0	0	0	0	0	0	0	0	0	0	0	0	0	0
gypsy-7_del base	0	0	0	169	0	0	0	0	0	184	0	0	0	0	0	0	0	0	0	0	182	0	0	182	0	0	0	0	0	0	0	0	0	0	0	0	0	0	0	0	0	0	0	0	0	0	0	0	0
r1_der base	44	216	0	0	0	231	473	0	0	107	0	0	0	0	0	0	0	0	0	85	0	0	0	0	0	0	0	0	323	0	0	0	0	0	0	0	0	0	0	0	0	0	0	0	0	0	0	0	0
bel-4_dper base	187	0	0	0	0	0	302	0	0	0	0	0	0	0	0	0	0	0	0	836	0	0	0	0	0	0	0	0	891	0	0	0	0	0	0	0	0	0	0	0	0	0	0	0	0	0	0	0	0
p_dg base	102	131	0	0	0	0	473	0	0	0	0	0	0	0	0	0	0	0	0	692	0	0	0	0	0	0	0	0	802	0	0	0	0	0	0	380	0	0	0	0	0	0	0	0	0	0	0	0	0
bel-3_deu base	47	0	0	2952	0	0	0	0	0	0	0	0	0	0	0	0	0	0	0	0	0	0	0	0	0	0	0	0	0	0	0	0	0	0	0	0	0	0	0	0	0	0	0	0	0	0	0	0	0
gypsy-10_dvir base	535	0	0	0	0	0	197	0	0	0	0	0	0	0	0	0	0	0	0	626	0	0	0	0	0	0	0	0	556	0	0	0	0	0	0	0	0	0	0	0	0	0	0	0	0	0	0	0	0
gypsy-21_dy base	0	0	0	0	0	0	0	0	0	464	0	0	0	0	0	0	0	0	0	773	136	0	0	0	0	0	0	0	0	0	0	0	0	0	0	0	0	0	0	0	0	0	0	0	0	0	0	0	0
aluii_dm base	1927	1011	0	0	0	0	0	0	0	0	0	0	0	0	0	0	0	0	0	0	0	0	0	0	0	0	0	0	0	0	0	0	0	0	0	0	0	0	0	0	0	0	0	0	0	0	0	0	0
bel-1_dper base	467	57	0	0	0	0	510	0	0	0	0	0	0	0	0	0	0	0	0	294	0	0	0	0	0	0	0	0	580	0	0	0	0	0	0	0	0	0	0	0	0	0	0	0	0	0	0	0	0
bel-5_dya base	0	458	0	0	0	0	1091	0	0	1083	0	0	0	0	0	0	0	0	0	0	0	0	0	0	0	0	0	0	0	0	0	0	0	0	0	0	0	0	0	0	0	0	0	0	0	0	0	0	0
transib-6_dan base	1171	178	0	0	0	0	0	0	0	0	0	0	0	0	0	0	0	0	0	45	0	0	0	0	0	0	0	0	0	0	0	0	0	0	0	0	0	0	0	0	0	0	0	0	0	0	0	0	0
r1-3_dya base	0	0	0	0	0	0	0	0	1132	0	0	0	0	0	0	0	0	0	0	0	729	0	318	0	0	0	0	0	444	0	0	0	0	0	0	0	0	0	0	0	0	0	0	0	0	0	0	0	0
bel-22_dta base	0	0	0	0	0	0	0	0	2075	0	0	0	0	0	0	0	0	0	0	0	0	0	0	0	0	0	0	0	49	0	0	0	0	0	0	0	0	0	0	0	0	0	0	0	0	0	0	0	0
jockey-4_dbp base	0	1304	0	0	0	0	42	0	0	0	0	0	0	0	0	0	0	0	0	1421	0	0	0	0	0	0	0	0	0	0	0	0	0	0	0	0	0	0	0	0	0	0	0	0	0	0	0	0	0
gypsy16_dpse base	0	0	0	0	0	0	0	0	0	0	0	0	0	0	0	0	0	0	0	0	0	0	0	0	0	0	0	0	0	0	0	0	0	0	0	0	0	0	0	0	0	0	0	0	0	0	0	0	0
gypsy-28_dya base	0	0	0	0	0	385	328	0	0	0	0	0	0	0	0	0	0	0	0	1629	0	0	0	0	0	0	0	0	0	0	0	0	0	0	0	0	0	0	0	0	0	0	0	0	0	0	0	0	0
helitron-1n_df base	484	0	0	0	0	0	207	0	0	0	0	0	0	0	0	0	0	0	0	311	0	59	0	0	0	0	0	0	881	0	0	0	0	0	0	264	0	0	0	0	0	0	0	0	0	0	0	0	0
i-2_dbp base	0	0	0	0	0	0	0	0	0	0	0	0	0	0	0	0	0	0	0	654	0	0	0	0	0	0	0	0	0	0	0	0	0	0	0	0	0	0	0	0	0	0	0	0	0	0	0	0	0
bel-5_dan base	46	0	0	0	0	0	60	0	0	2531	0	0	0	0	0	0	0	0	0	0	0	0	0	0	0	0	0	0	0	0	0	0	0	0	0	0	0	0	0	0	0	0	0	0	0	0	0	0	0
gypsy-5_dbp base	466	0	0	0	0	0	637	0	0	0	0	0	0	0	0	0	0	0	0	375	0	0	0	0	0	0	0	0	417	0	0	0	0	0	0	0	0	0	0	0	0	0	0	0	0	0	0	0	0
jockey-11_df base	0	0	0	0	0	0	0	0	0	0	0	0	0	0	0	0	0	0	0	2612	0	0	0	0	0	0	0	0	0	0	0	0	0	0	0	0	0	0	0	0	0	0	0	0	0	0	0	0	0
gypsy-13_del base	0	0	0	0	0	0	0	0	0	0	0	0	0	0	0	0	0	0	0	0	0	0	2559	0	0	0	0	0	0	0	0	0	0	0	0	0	0	0	0	0	0	0	0	0	0	0	0	0	0
gypsy-17_dan base	0	0	0	0	0	0	2554	0	0	0	0	0	0	0	0	0	0	0	0	0	0	0	0	0	0	0	0	0	0	0	0	0	0	0	0	0	0	0	0	0	0	0	0	0	0	0	0	0	0
bel-2_dan base	0	0	0	0	0	354	1491	0	0	581	0	0	0	0	0	0	0	0	0	0	0	0	0	0	0	0	0	0	0	0	0	0	0	0	0	0	0	0	0	0	0	0	0	0	0	0	0	0	0
mariner-9_drh base	0	537	0	0	0	0	0	0	0	0	0	0	0	777	0	0	0	0	0	0	915	0	0	0	0	0	0	0	0	0	0	0	0	0	0	274	0	0	0	0	0	0	0	0	0	0	0	0	0
cr1-1_del base	0	1217	0	0	0	0	0	0	0	0	0	0	0	0	0	0	0	0	0	0	0	0	674	0	0	0	0	0	520	0	0	0	0	0	0	0	0	0	0	0	0	0	0	0	0	0	0	0	0
gypsy-11_dan base	0	0	0	0	0	0	0	0	0	0	0	0	0	0	0	0	0	0	0	177	0	0	0	0	0	0	0	0	0	0	0	0	0	0	0	0	0	0	0	0	0	0	0	0	0	0	0	0	0
i-3_deu base	0	0	0	1722	0	0	528	0	0	0	0	0	0	0	0	0	0	0	0	56	0	0	0	0	0	0	0	0	41	0	0	0	0	0	0	0	0	0	0	0	0	0	0	0	0	0	0	0	0
jockey-4_drh base	0	474	0	0	0	0	618	0	0	329	0	0	0	0	0	0	0	0	0	140	487	0	0	0	0	0	0	0	0	0	0	0	0	0	0	81	0	0	0	0	0	0	0	0	0	0	0	0	0
jockey-3_dper base	189	0	0	0	0	0	735	0	0	0	0	0	0	0	0	0	0	0	0	363	0	0	0	0	0	0	0	0	329	0	0	0	0	0	0	0	0	0	0	0	0	0	0	0	0	0	0	0	0
outcast-2_dan base	908	0	0	0	0	0	505	0	0	0	0	0	0	0	0	0	0	0	0	0	0	0	0	0	0	0	0	0	0	0	0	0	0	0	0	83	0	0	0	0	0	0	0	0	0	0	0	0	0
gypsy-21_del base	0	0	441	0	0	1003	727	0	0	0	0	0	0	0	0	0	0	0	0	76	0	0	0	0	0	0	0	0	0	0	0	0	0	0	0	0	0	0	0	0	0	0	0	0	0	0	0	0	0
gypsy-57_del base	427	0	0	165	0	0	532	0	0	0	0	0	0	0	0	0	0	0	0	0	0	0	0	0	0	0	0	0	1122	0	0	0	0	0	0	0	0	0	0	0	0	0	0	0	0	0	0	0	0
transib4_dp base	671	0	0	0	0	0	0	0	0	216	0	0	0	0	0	0	0	0	0	1206	0	0	0	0	0	0	0	0	0	0	0	0	0	0	0	0	0	0	0	0	0	0	0	0	0	0	0	0	0
i-4_dk base	0	0	0	1119	0	0	776	0	0	0	0	0	0	0	0	0	0	0	0	199	0	0	0	0	0	0	0	0	0	0	0	0	0	0	0	0	0	0	0	0	0	0	0	0	0	0	0	0	0
bel-4_dbi base	0	377	0	640	0	0	0	0	0	0	0	0	0	0	0	0	0	0	0	0	533	0	0	533	0	0	0	0	0	0	0	0	0	0	0	0	0	0	0	0	0	0	0	0	0	0	0	0	0
gypsy-5_del base	121	255	97	0	0	61	719	0	0	47	0	0	0	0	0	0	0	0	0	330	0	0	0	0	0	0	0	0	0	0	0	0	0	0	0	0	0	0	0	0	0	0	0	0	0	0	0	0	0
i-4_dan base	0	0	0	0	0	0	0	0	0	0	0	0	0	0	0	0	0	0	0	0	0	0	0	0	0	0	0	0	56	0	0	0	0	0	0	0	0	0	0	0	0	0	0	0	0	0	0	0	0
gypsy-41_dan base	76	0	0	0	0	0	0	0	1200	0	0	0	0	0	0	0	0	0	0	0	332	0	0	514	0	0	0	0	0	0	0	0	0	0	0	0	0	0	0	0	0	0	0	0	0	0	0	0	0
bel-3_dvir base	0	0	0	0	0	217	454	0	0	0	0	0	0	0	0	0	0	0	0	451	0	0	360	183	0	0	0	0	0	0	0	0	0	0	0	0	0	0	0	0	0	0	0	0	0	0	0	0	0
gypsy-37_del base	0	0	0	422	0	0	1029	0	0	0	0	0	0	0	0	0	0	0	0	74	0	0	0	0	0	0	0	0	0	0	0	0	0	0	0	0	0	0	0	0	0	0	0	0	0	0	0	0	0
bel-10_dbp base	149	0	0	0	0	0	256	0	0	0	0	0	0	0	0	0	0	0	0	175	0	0	0	0	0	0	0	0	765	0	0	0	0	0	0	0	0	0	0	0	0	0	0	0	0	0	0	0	0
gypsy-8_dta base	0	0	562	0	0	488	850	0	0	0	0	0	0	0	0	0	0	0	0	0	0	0	0	0	0	0	0	0	0	0	0	0	0	0	0	0	0	0	0	0	0	0	0	0	0	0	0	0	0
helitronn-1_dpe base	424	0	0	0	0	0	245	0	0	0	0	0	0	0	0	0	0	0	0	105	0	0	0	0	0	0	0	0	609	0	0	0	0	0	0	0	0	0	0	0	0	0	0	0	0	0	0	0	0
gypsy-30_del base	0	0	0	0	0	0	0	0	0	0	0	0	0	0	0	0	0	0	0	0	0	0	0	0	0	0	0	0	0	0	0	0	0	0	0	0	0	0	0	0	0	0	0	0	0	0	0	0	0
helitron-1n1_dvir base	83	0	0	0	0	92	346	0	0	0	0	0	0	0	0	0	0	0	0	507	0	0	0	0	0	0	0	0	518	0	0	0	0	0	0	0	0	0	0	0	0	0	0	0	0	0	0	0	0
r1-5_dk base	0	0	0	0	0	0	600	0	729	580	0	0	0	0	0	0	0	0	0	0	0	0	0	0	0	0	0	0	0	0	0	0	0	0	0	0	0	0	0	0	0	0	0	0	0	0	0	0	0
transib-3_df base	0	0	0	0	0	0	0	0	0	0	0	0	0	0	0	0	0	0	0	539	0	0	0	0	0	0	0	0	185	0	0	0	0	0	0	73	0	0	0	0	0	0	0	0	0	0	0	0	0
jockey-2_del base	0	298	0	0	0	0	282	0	0	0	0	0	0	0	0	0	0	0	0	869	0	0	0	0	0	0	0	0	0	0	0	0	0	0	0	434	0	0	0	0	0	0	0	0	0	0	0	0	0
i-2_del base	0	0	0	0	0	325	0	0	0	0	0	0	0	0	0	0	0	0	0	1375	0	0	0	0	0	0	0	0	0	0	0	0	0	0	0	0	0	0	0	0	0	0	0	0	0	0	0	0	0
jockey-14_dbp base	498	0	0	0	0	0	0	0	365	154	0	0	0	0	0	0	0	0	0	0	0	0	242	0	0	0	0	0	0	0	0	0	0	0	0	0	0	0	0	0	0	0	0	0	0	0	0	0	0
jockey-3_dt base	70	81	0	0	0	73	0	0	0	0	0	0	0	0	0	0	0	0	0	800	0	0	0	0	0	0	0	0	0	0	0	0	0	0	0	704	0	0	0	0	0	0	0	0	0	0	0	0	0
mariner-9_del base	598	0	0	0	0	0	0	0	0	0	0	0	0	0	0	0	0	0	0	1229	0	0	0	0	0	0	0	0	0	0	0	0	0	0	0	0	0	0	0	0	0	0	0	0	0	0	0	0	0
copia-2_dwil base	0	0	0	0	0	0	0	0	0	0	0	0	0	0	0	0	0	0	0	0	0	0	0	0	0	0	0	0	0	0	0	0	0	0	0	0	0	0	0	0	0	0	0	0	0	0	0	0	0
bs4_dm base	0	0	0	0	0	485	0	0	0	0	0	0	0	0	0	0	0	0	0	0	0	0	0	0	0	0	0	0	754	0	0	0	0	0	0	0	0	0	0	0	0	0	0	0	0	0	0	0	0
r1-5b_dk base	0	0	0	57	0	0	873	0	743	0	0	0	0	0	0	0	0	0	0	0	0	0	0	0	0	0	0	0	0	0	0	0	0	0	0	0	0	0	0	0	0	0	0	0	0	0	0	0	0
gypsy14_dpse base	154	0	0	0	0	0	177	0	0	0	0	0	0	0	0	0	0	0	0	740	0	0	0	0	0	0	0	0	228	0	0	0	0	0	0	0	0	0	0	0	0	0	0	0	0	0	0	0	0
hat-4_dk base	186	0	0	1263	0	0	0	0	0	0	0	0	0	0	0	0	0	0	0	0	0	0	0	0	0	0	0	0	278	0	0	0	0	0	0	0	0	0	0	0	0	0	0	0	0	0	0	0	0
bel-4_drh base	0	0	0	0	0	494	0	0	0	0	0	0	0	0	0	0	0	0	0	79	529	0	0	522	0	0	0	0	86	0	0	0	0	0	0	0	0	0	0	0	0	0	0	0	0	0	0	0	0
rep-1_del base	160	0	0	0	0	0	115	0	0	0	0	0	0	0	0	0	0	0	0	367	0	0	0	0	0	0	0	0	321	0	0	0	0	0	0	0	0	0	0	0	0	0	0	0	0	0	0	0	0
gypsy-18_dbp base	0	0	0	0	0	0	0	0	0	180	0	0	0	0	0	0	0	0	0	1502	0	0	0	0	0	0	0	0	0	0	0	0	0	0	0	0	0	0	0	0	0	0	0	0	0	0	0	0	0
bel-9_dwil base	0	0	1258	0	0	0	0	0	0	0	0	0	0	0	0	0	0	0	0	417	0	0	0	0	0	0	0	0	0	0	0	0	0	0	0	0	0	0	0	0	0	0	0	0	0	0	0	0	0
bel-14_del base	0	0	0	388	413	0	0	0	0	0	0	0	0	0	0	0	0	0	0	547	0	0	316	0	0	0	0	0	0	0	0	0	0	0	0	0	0	0	0	0	0	0	0	0	0	0	0	0	0
mariner-4_dy base	0	0	119	0	0	522	443	0	0	0	0	0	0	0	0	0	0	0	0	422	0	0	0	0	0	0	0	0	0	0	0	0	0	0	0	154	0	0	0	0	0	0	0	0	0	0	0	0	0
jockey-7_drh base	0	0	0	198	135	0	411	0	56	0	0	0	0	0	0	0	0	0	0	178	0	0	482	0	0	0	0	0	67	0	0	0	0	0	0	0	0	0	0	0	0	0	0	0	0	0	0	0	0
tv1i base	0	0	0	0	0	397	0	0	0	0	0	0	0	0	0	0	0	0	0	0	0	0	0	0	0	0	0	0	0	0	0	0	0	0	0	0	0	0	0	0	0	0	0	0	0	0	0	0	0
bel-6_dbp base	0	1111	0	414	0	0	0	0	0	0	0	0	0	0	0	0	0	0	0	124	0	0	0	0	0	0	0	0	0	0	0	0	0	0	0	0	0	0	0	0	0	0	0	0	0	0	0	0	0
mariner-1_dsim base	0	0	0	1632	0	0	0	0	0	0	0	0	0	0	0	0	0	0	0	0	0	0	0	0	0	0	0	0	0	0	0	0	0	0	0	0	0	0	0	0	0	0	0	0	0	0	0	0	0
helena base	0	0	0	0	0	0	0	0	0	0	0	0	0	0	0	0	0	0	0	79	906	0	0	0	0	0	0	0	0	0	0	0	0	0	0	0	0	0	0	0	0	0	0	0	0	0	0	0	0
homo1 base	1301	0	0	0	0	0	0	0	0	0	0	0	0	0	0	0	0	0	0	39	0	0	0	0	0	0	0	0	0	0	0	0	0	0	0	0	0	0	0	0	0	0	0	0	0	0	0	0	0
jockey-8_deu base	134	0	0	0	0	0	0	0	0	0	0	0	0	473	473	0	0	0	0	0	0	0	0	0	0	0	0	0	0	0	0	0	0	0	0	0	0	0	0	0	0	0	0	0	0	0	0	0	0
mariner-2_dt base	0	602	0	0	0	0	182	0	0	721	0	0	0	0	0	0	0	0	0	0	0	0	0	0	0	0	0	0	0	0	0	0	0	0	0	47	0	0	0	0	0	0	0	0	0	0	0	0	0
transib-7_drh base	483	0	0	0	0	0	658	0	272	0	0	0	0	0	0	0	0	0	0	0	0	0	0	0	0	0	0	0	0	0	0	0	0	0	0	0	0	0	0	0	0	0	0	0	0	0	0	0	0
i-6_df base	0	0	0	0	0	0	0	0	0	0	0	0	0	0	0	0	0	0	0	0	0	0	0	0	0	0	0	0	474	0	0	0	0	0	0	0	0	0	0	0	0	0	0	0	0	0	0	0	0
gypsy-18_dta base	0	221	161	0	0	296	156	0	0	0	0	0	0	0	0	0	0	0	0	0	0	0	0	0	0	0	0	0	107	0	0	0	0	0	0	444	0	0	0	0	0	0	0	0	0	0	0	0	0
gypsy-25_dan base	0	0	0	0	0	0	0	0	338	0	0	0	0	0	0	0	0	0	0	0	0	0	0	0	0	0	0	0	0	0	0	0	0	0	0	0	0	0	0	0	0	0	0	0	0	0	0	0	0
gypsy-20_dan base	0	0	0	0	0	0	0	0	466	0	0	0	0	0	0	0	0	0	0	0	0	0	0	0	0	0	0	0	0	0	0	0	0	0	0	0	0	0	0	0	0	0	0	0	0	0	0	0	0
bel3_dm base	70	0	13	33	0	0	190	0	0	46	0	0	0	0	0	0	0	0	0	191	0	0	33	0	0	0	0	0	166	0	0	0	0	0	0	0	0	0	0	0	0	0	0	0	0	0	0	0	0
jockey-3_df base	104	210	0	0	0	0	0	0	683	0	0	0	0	0	0	0	0	0	0	80	0	0	0	0	0	0	0	0	46	0	0	0	0	0	0	347	0	0	0	0	0	0	0	0	0	0	0	0	0
mariner-9_dan base	0	212	0	0	0	286	919	0	0	0	0	0	0	0	0	0	0	0	0	0	0	0	0	0	0	0	0	0	0	0	0	0	0	0	0	0	0	0	0	0	0	0	0	0	0	0	0	0	0
bel-14_dta base	0	350	0	0	0	0	0	0	0	0	0	0	0	0	0	0	0	0	0	598	0	0	0	0	0	0	0	0	130	0	0	0	0	0	0	337	0	0	0	0	0	0	0	0	0	0	0	0	0
bel-1_dbi base	0	0	0	0	0	0	720	0	0	72	0	0	0	0	0	0	0	0	0	0	0	0	71	0	0	0	0	0	515	0	0	0	0	0	0	0	0	0	0	0	0	0	0	0	0	0	0	0	0
dmrpr base	0	0	0	0	0	0	0	0	0	0	0	0	0	0	0	0	0	0	0	1376	0	0	0	0	0	0	0	0	0	0	0	0	0	0	0	0	0	0	0	0	0	0	0	0	0	0	0	0	0
gypsy-9_drh base	0	151	197	0	0	158	730	0	0	0	0	0	0	0	0	0	0	0	0	0	0	0	0	0	0	0	0	0	0	0	0	0	0	0	0	0	0	0	0	0	0	0	0	0	0	0	0	0	0
mudr-1_dt base	0	0	0	0	0	0	0	0	0	0	0	0	0	0	0	0	0	0	0	130	0	0	0	0	0	0	0	0	81	0	0	0	0	0	0	0	0	0	0	0	0	0	0	0	0	0	0	0	0
copia-1_dy base	0	0	0	0	0	779	0	0	0	0	0	0	0	0	0	0	0	0	0	564	0	0	0	0	0	0	0	0	0	0	0	0	0	0	0	0	0	0	0	0	0	0	0	0	0	0	0	0	0
gypsy-7_dwil base	0	43	0	0	0	0	0	0	0	0	0	0	0	0	0	0	0	0	0	0	0	0	1289	0	0	0	0	0	0	0	0	0	0	0	0	0	0	0	0	0	0	0	0	0	0	0	0	0	0
bel-1_dwil base	151	0	0	0	0	0	159	0	0	0	0	0	0	0	0	0	0	0	0	72	0	0	0	0	0	0	0	0	68	0	0	0	0	0	0	77	0	0	0	0	0	0	0	0	0	0	0	0	0
gypsy-23_dy base	58	0	0	0	0	0	213	0	0	0	0	0	0	0	0	0	0	0	0	0	0	0	0	0	0	0	0	0	0	0	0	0	0	0	0	0	0	0	0	0	0	0	0	0	0	0	0	0	0
mariner-12_drh base	0	93	0	0	0	687	294	0	0	0	0	0	0	0	0	0	0	0	0	0	0	0	0	0	0	0	0	0	218	0	0	0	0	0	0	0	0	0	0	0	0	0	0	0	0	0	0	0	0
jockey-5_dk base	0	765	0	0	0	0	315	0	0	0	0	0	0	0	0	0	0	0	0	109	101	0	0	0	0	0	0	0	0	0	0	0	0	0	0	0	0	0	0	0	0	0	0	0	0	0	0	0	0
jockey-6_dya base	0	0	0	1191	0	0	0	0	0	0	0	0	0	0	0	0	0	0	0	0	0	0	89	0	0	0	0	0	0	0	0	0	0	0	0	0	0	0	0	0	0	0	0	0	0	0	0	0	0
bel-5_drh base	0	0	801	0	0	0	0	0	0	56	0	0	0	0	0	0	0	0	0	0	0	0	0	0	0	0	0	0	303	0	0	0	0	0	0	115	0	0	0	0	0	0	0	0	0	0	0	0	0
jockey-6_deu base	0	106	0	0	0	0	103	0	0	0	0	0	0	0	0	0	0	0	0	1064	0	0	0	0	0	0	0	0	0	0	0	0	0	0	0	0	0	0	0	0	0	0	0	0	0	0	0	0	0
gypsy5_dpse base	0	0	0	0	0	0	155	0	0	366	0	0	0	0	0	0	0	0	0	40	0	0	0	699	0	0	0	0	0	0	0	0	0	0	0	0	0	0	0	0	0	0	0	0	0	0	0	0	0
gypsy-50_dwil base	253	0	0	0	0	0	149	0	0	0	0	0	0	0	0	0	0	0	0	50	0	0	0	0	0	0	0	0	205	0	0	0	0	0	0	124	0	0	0	0	0	0	0	0	0	0	0	0	0
gypsy22_dpse base	0	0	0	0	0	0	507	0	0	0	0	0	0	0	0	0	0	0	0	727	0	0	0	0	0	0	0	0	0	0	0	0	0	0	0	0	0	0	0	0	0	0	0	0	0	0	0	0	0
jockey-7_df base	0	0	0	0	0	0	1176	0	0	0	0	0	0	0	0	0	0	0	0	0	0	0	0	0	0	0	0	0	51	0	0	0	0	0	0	0	0	0	0	0	0	0	0	0	0	0	0	0	0
jockey-15_dbp base	283	0	0	0	0	0	65	0	0	0	0	0	0	0	0	0	0	0	0	37	0	0	0	0	0	0	0	0	230	0	0	0	0	0	0	0	0	0	0	0	0	0	0	0	0	0	0	0	0
helitron-n3_dt base	0	63	0	0	0	0	228	0	62	0	0	0	0	0	0	0	0	0	0	423	0	0	0	0	0	0	0	0	284	0	0	0	0	0	0	0	0	0	0	0	0	0	0	0	0	0	0	0	0
gypsy-19_dta base	0	0	0	0	0	0	0	0	1215	0	0	0	0	0	0	0	0	0	0	0	0	0	0	0	0	0	0	0	0	0	0	0	0	0	0	0	0	0	0	0	0	0	0	0	0	0	0	0	0
gypsy-28_dan base	45	0	0	549	0	0	314	0	0	92	0	0	0	0	0	0	0	0	0	0	0	0	0	0	0	0	0	0	0	0	0	0	0	0	0	0	0	0	0	0	0	0	0	0	0	0	0	0	0
mariner-5_drh base	383	0	0	0	0	0	0	0	0	0	0	0	0	0	0	0	0	0	0	221	0	0	0	0	0	0	0	0	0	0	0	0	0	0	0	0	0	0	0	0	0	0	0	0	0	0	0	0	0
gypsy-10_dta base	0	0	0	0	0	0	82	0	0	38	0	0	0	0	0	0	0	0	0	0	0	0	0	0	0	0	0	0	1089	0	0	0	0	0	0	0	0	0	0	0	0	0	0	0	0	0	0	0	0
gypsy-15_dbp base	0	0	0	0	0	0	57	0	1128	0	0	0	0	0	0	0	0	0	0	0	0	0	0	0	0	0	0	0	0	0	0	0	0	0	0	0	0	0	0	0	0	0	0	0	0	0	0	0	0
i-3_df base	0	0	0	0	0	0	1031	0	0	0	0	0	0	0	0	0	0	0	0	152	0	0	0	0	0	0	0	0	0	0	0	0	0	0	0	0	0	0	0	0	0	0	0	0	0	0	0	0	0
gypsy-1_dvir base	0	0	0	0	0	268	78	0	683	152	0	0	0	0	0	0	0	0	0	0	0	0	0	0	0	0	0	0	0	0	0	0	0	0	0	0	0	0	0	0	0	0	0	0	0	0	0	0	0
rep-2_df base	131	0	0	0	0	0	251	0	0	0	0	0	0	0	0	0	0	0	0	0	0	0	0	0	0	0	0	0	0	0	0	0	0	0	0	0	0	0	0	0	0	0	0	0	0	0	0	0	0
helitron-2n_dw base	171	0	0	0	0	0	89	0	0	0	0	0	0	0	0	0	0	0	0	240	0	0	0	0	0	0	0	0	412	0	0	0	0	0	0	0	0	0	0	0	0	0	0	0	0	0	0	0	0
gypsy-52_dwil base	0	0	0	0	482	0	0	0	0	0	0	0	0	0	0	0	0	0	0	0	0	0	634	0	0	0	0	0	51	0	0	0	0	0	0	0	0	0	0	0	0	0	0	0	0	0	0	0	0
jockey-4_del base	0	553	0	0	0	78	0	0	0	372	0	0	0	0	0	0	0	0	0	76	0	0	0	0	0	0	0	0	80	0	0	0	0	0	0	0	0	0	0	0	0	0	0	0	0	0	0	0	0
gypsy-29_dwil base	87	0	0	0	0	0	383	0	62	0	0	0	0	0	0	0	0	0	0	175	0	0	0	0	0	0	0	0	329	0	0	0	0	0	0	0	0	0	0	0	0	0	0	0	0	0	0	0	0
i-1_deu base	0	0	0	0	0	0	1154	0	0	0	0	0	0	0	0	0	0	0	0	0	0	0	0	0	0	0	0	0	0	0	0	0	0	0	0	0	0	0	0	0	0	0	0	0	0	0	0	0	0
bel-3_dper base	68	0	0	0	459	0	0	0	0	0	0	0	0	0	0	0	0	0	0	47	0	0	576	0	0	0	0	0	0	0	0	0	0	0	0	0	0	0	0	0	0	0	0	0	0	0	0	0	0
cr1-9_dta base	0	200	0	0	0	0	576	0	0	0	0	0	0	0	0	0	0	0	0	0	0	0	0	0	0	0	0	0	121	0	0	0	0	0	0	0	0	0	0	0	0	0	0	0	0	0	0	0	0
bel-6_dmoj base	157	0	0	0	0	0	0	0	0	0	0	0	0	0	0	0	0	0	0	51	0	0	0	0	0	0	0	0	164	0	0	0	0	0	0	0	0	0	0	0	0	0	0	0	0	0	0	0	0
hoana6 base	0	0	0	0	0	0	47	0	0	0	0	0	0	0	0	0	0	0	0	599	0	0	0	0	0	0	0	0	234	0	0	0	0	0	0	0	0	0	0	0	0	0	0	0	0	0	0	0	0
homo3 base	95	0	0	0	0	0	307	0	0	0	0	0	0	0	0	0	0	0	0	0	0	0	0	0	0	0	0	0	312	0	0	0	0	0	0	0	0	0	0	0	0	0	0	0	0	0	0	0	0
r1-7_dper base	0	517	0	0	0	0	272	0	0	0	0	0	0	0	0	0	0	0	0	0	0	0	0	0	0	0	0	0	0	0	0	0	0	0	0	0	0	0	0	0	0	0	0	0	0	0	0	0	0
gypsy-28_dbp base	0	0	54	0	0	0	0	0	0	0	0	0	0	0	0	0	0	0	0	1002	0	0	0	0	0	0	0	0	0	0	0	0	0	0	0	0	0	0	0	0	0	0	0	0	0	0	0	0	0
jockey-8_drh base	0	0	0	0	0	70	92	0	121	378	0	0	0	0	0	0	0	0	0	246	0	0	0	0	0	0	0	0	0	0	0	0	0	0	0	0	0	0	0	0	0	0	0	0	0	0	0	0	0
gypsy-13_deu base	0	0	224	0	0	0	872	0	0	0	0	0	0	0	0	0	0	0	0	0	0	0	0	0	0	0	0	0	0	0	0	0	0	0	0	0	0	0	0	0	0	0	0	0	0	0	0	0	0
polinton-1_dan base	152	0	0	0	0	0	252	0	0	0	0	0	0	0	0	0	0	0	0	0	0	0	0	0	0	0	0	0	55	0	0	0	0	0	0	0	0	0	0	0	0	0	0	0	0	0	0	0	0
gypsy-26_dpse base	72	0	371	0	0	231	0	0	150	172	0	0	0	0	0	0	0	0	0	0	0	0	0	0	0	0	0	0	34	0	0	0	0	0	0	0	0	0	0	0	0	0	0	0	0	0	0	0	0
gypsy-27_dp base	132	0	0	0	0	0	462	0	0	0	0	0	0	0	0	0	0	0	0	127	0	0	0	0	0	0	0	0	124	0	0	0	0	0	0	0	0	0	0	0	0	0	0	0	0	0	0	0	0
gypsy-42_dwil base	66	0	0	0	0	0	388	0	0	0	0	0	0	0	0	0	0	0	0	607	0	0	0	0	0	0	0	0	0	0	0	0	0	0	0	0	0	0	0	0	0	0	0	0	0	0	0	0	0
copia1_dpse base	0	0	0	0	0	0	0	0	0	0	0	0	0	0	0	0	0	0	0	35	0	0	1024	0	0	0	0	0	0	0	0	0	0	0	0	0	0	0	0	0	0	0	0	0	0	0	0	0	0
hoana1 base	426	0	0	0	0	0	254	0	0	0	0	0	0	0	0	0	0	0	0	82	0	0	0	0	0	0	0	0	158	0	0	0	0	0	0	0	0	0	0	0	0	0	0	0	0	0	0	0	0
i-3_dbi base	0	0	0	0	0	0	0	0	0	0	0	0	0	0	0	0	0	0	0	263	0	0	0	0	0	0	0	0	0	0	0	0	0	0	0	0	0	0	0	0	0	0	0	0	0	0	0	0	0
jockey-7_dya base	0	0	0	0	0	0	0	0	0	0	0	0	0	0	0	0	0	0	0	1039	0	0	0	0	0	0	0	0	0	0	0	0	0	0	0	0	0	0	0	0	0	0	0	0	0	0	0	0	0
gypsy-9_dbp base	0	0	0	0	0	186	0	0	0	0	0	0	0	0	0	0	0	0	0	0	0	0	384	0	0	0	0	0	0	0	0	0	0	0	0	0	0	0	0	0	0	0	0	0	0	0	0	0	0
gypsy-3_dfi base	0	0	0	0	0	0	0	0	0	0	0	0	0	0	0	0	0	0	0	1025	0	0	0	0	0	0	0	0	0	0	0	0	0	0	0	0	0	0	0	0	0	0	0	0	0	0	0	0	0
i-4_deu base	0	0	0	0	0	0	571	0	0	0	0	0	0	0	0	0	0	0	0	135	0	0	0	0	0	0	0	0	0	0	0	0	0	0	0	0	0	0	0	0	0	0	0	0	0	0	0	0	0
gypsy-54_del base	0	809	0	0	0	0	0	0	0	0	0	0	0	0	0	0	0	0	0	0	0	0	0	0	0	0	0	0	122	0	0	0	0	0	0	0	0	0	0	0	0	0	0	0	0	0	0	0	0
gypsy-5_der base	0	0	0	0	0	92	0	0	63	0	0	0	0	0	0	0	0	0	0	717	0	0	0	0	0	0	0	0	0	0	0	0	0	0	0	0	0	0	0	0	0	0	0	0	0	0	0	0	0
hopseu2 base	0	0	0	0	0	0	0	0	0	0	0	0	0	0	0	0	0	0	0	0	0	0	0	0	0	0	0	0	983	0	0	0	0	0	0	0	0	0	0	0	0	0	0	0	0	0	0	0	0
jockey-1_dt base	0	0	0	0	0	0	279	0	141	0	0	0	0	0	0	0	0	0	0	0	0	0	0	0	0	0	0	0	0	0	0	0	0	0	0	562	0	0	0	0	0	0	0	0	0	0	0	0	0
gypsy-60_dwil base	0	352	0	0	0	0	0	0	0	0	0	0	0	0	0	0	0	0	0	0	350	0	0	0	0	0	0	0	0	0	0	0	0	0	0	0	0	0	0	0	0	0	0	0	0	0	0	0	0
gypsy-32_dan base	0	0	0	0	0	0	44	0	0	0	0	0	0	0	0	0	0	0	0	0	933	0	0	0	0	0	0	0	0	0	0	0	0	0	0	0	0	0	0	0	0	0	0	0	0	0	0	0	0
jockey-9_df base	0	59	0	0	0	0	0	0	0	0	0	0	0	0	0	0	0	0	0	918	0	0	0	0	0	0	0	0	0	0	0	0	0	0	0	0	0	0	0	0	0	0	0	0	0	0	0	0	0
galileo_db base	148	63	0	0	0	0	32	0	0	0	0	0	0	0	0	0	0	0	0	59	0	0	0	0	0	0	0	0	165	0	0	0	0	0	0	0	0	0	0	0	0	0	0	0	0	0	0	0	0
copia-6_dwil base	0	649	0	0	0	0	323	0	0	0	0	0	0	0	0	0	0	0	0	0	0	0	0	0	0	0	0	0	0	0	0	0	0	0	0	0	0	0	0	0	0	0	0	0	0	0	0	0	0
copia-7_dan base	0	0	0	0	0	0	0	0	0	0	0	0	0	0	0	0	0	0	0	0	0	0	0	0	0	0	0	0	0	0	0	0	0	0	0	0	0	0	0	0	0	0	0	0	0	0	0	0	0
gypsy-29_dan base	0	0	0	0	0	0	0	0	0	0	0	0	0	0	0	0	0	0	0	0	955	0	0	0	0	0	0	0	0	0	0	0	0	0	0	0	0	0	0	0	0	0	0	0	0	0	0	0	0
copia-2_dta base	0	0	0	0	0	0	0	0	0	951	0	0	0	0	0	0	0	0	0	0	0	0	0	0	0	0	0	0	0	0	0	0	0	0	0	0	0	0	0	0	0	0	0	0	0	0	0	0	0
placw_dm base	0	0	0	0	0	0	0	0	0	0	0	0	0	0	0	0	0	0	0	930	0	0	0	0	0	0	0	0	0	0	0	0	0	0	0	0	0	0	0	0	0	0	0	0	0	0	0	0	0
copia-2_dki base	0	0	0	0	0	0	0	0	0	0	0	0	0	0	0	0	0	0	0	926	0	0	0	0	0	0	0	0	0	0	0	0	0	0	0	0	0	0	0	0	0	0	0	0	0	0	0	0	0
gypsy-11_dbp base	0	0	0	0	0	183	0	0	0	0	0	0	0	0	0	0	0	0	0	0	0	0	100	0	0	0	0	0	0	0	0	0	0	0	0	0	0	0	0	0	0	0	0	0	0	0	0	0	0
gypsy-1_dbi base	0	0	0	0	0	0	205	0	0	0	0	0	0	0	0	0	0	0	0	702	0	0	0	0	0	0	0	0	0	0	0	0	0	0	0	0	0	0	0	0	0	0	0	0	0	0	0	0	0
transibn1_dp base	0	0	0	0	0	0	168	0	0	0	0	0	0	0	0	0	0	0	0	240	0	0	0	0	0	0	0	0	0	0	0	0	0	0	0	0	0	0	0	0	0	0	0	0	0	0	0	0	0
gypsy6_dmoj base	0	0	0	0	0	0	0	0	0	0	0	0	0	0	0	0	0	0	0	60	0	0	0	0	0	0	0	0	63	0	0	0	0	0	0	0	0	0	0	0	0	0	0	0	0	0	0	0	0
nobel base	0	0	0	0	0	0	161	0	0	0	0	0	0	0	0	0	0	0	0	135	0	0	0	0	0	0	0	0	183	0	0	0	0	0	0	0	0	0	0	0	0	0	0	0	0	0	0	0	0
i-3_dk base	0	0	0	133	242	0	251	0	0	0	0	0	0	0	0	0	0	0	0	0	0	0	0	0	0	0	0	0	129	0	0	0	0	0	0	0	0	0	0	0	0	0	0	0	0	0	0	0	0
gypsy-21_dan base	0	0	0	0	0	825	0	0	0	0	0	0	0	0	0	0	0	0	0	0	0	0	0	0	0	0	0	0	0	0	0	0	0	0	0	0	0	0	0	0	0	0	0	0	0	0	0	0	0
gypsy-31_dwil base	26	0	0	0	0	81	135	0	162	0	0	0	0	0	0	0	0	0	0	33	0	0	96	0	0	0	0	0	0	0	0	0	0	0	0	0	0	0	0	0	0	0	0	0	0	0	0	0	0
jockey-4_dvi base	0	0	0	0	0	0	0	0	0	0	0	0	0	0	0	0	0	0	0	331	522	0	0	0	0	0	0	0	0	0	0	0	0	0	0	0	0	0	0	0	0	0	0	0	0	0	0	0	0
ulysses base	0	852	0	0	0	0	0	0	0	0	0	0	0	0	0	0	0	0	0	0	0	0	0	0	0	0	0	0	0	0	0	0	0	0	0	0	0	0	0	0	0	0	0	0	0	0	0	0	0
transib-7_dbi base	0	0	0	0	0	455	0	0	0	0	0	0	0	0	0	0	0	0	0	0	0	0	0	0	0	0	0	0	0	0	0	0	0	0	0	0	0	0	0	0	0	0	0	0	0	0	0	0	0
i-4_df base	0	0	0	0	0	620	218	0	0	0	0	0	0	0	0	0	0	0	0	0	0	0	0	0	0	0	0	0	0	0	0	0	0	0	0	0	0	0	0	0	0	0	0	0	0	0	0	0	0
copia-3_dmoj base	0	0	0	0	0	0	783	0	0	0	0	0	0	0	0	0	0	0	0	0	0	0	0	0	0	0	0	0	0	0	0	0	0	0	0	0	0	0	0	0	0	0	0	0	0	0	0	0	0
jockey-2_dan base	0	0	0	0	0	0	0	0	793	0	0	0	0	0	0	0	0	0	0	42	0	0	0	0	0	0	0	0	0	0	0	0	0	0	0	0	0	0	0	0	0	0	0	0	0	0	0	0	0
gypsy-21_dwil base	0	0	0	0	0	0	0	0	0	521	0	0	0	0	0	0	0	0	0	310	0	0	0	0	0	0	0	0	0	0	0	0	0	0	0	0	0	0	0	0	0	0	0	0	0	0	0	0	0
jockey-12_dbp base	0	0	0	0	0	0	0	0	671	0	0	0	0	0	0	0	0	0	0	0	0	0	0	0	0	0	0	0	0	0	0	0	0	0	0	0	0	0	0	0	0	0	0	0	0	0	0	0	0
gypsy-2_del base	151	43	0	0	0	0	119	0	0	0	0	0	0	0	0	0	0	0	0	116	0	0	0	0	0	0	0	0	127	0	0	0	0	0	0	0	0	0	0	0	0	0	0	0	0	0	0	0	0
bel-2_dbp base	0	0	0	0	0	0	0	0	0	820	0	0	0	0	0	0	0	0	0	0	0	0	0	0	0	0	0	0	0	0	0	0	0	0	0	0	0	0	0	0	0	0	0	0	0	0	0	0	0
transib-6_drh base	0	0	0	0	0	0	0	0	0	0	0	0	0	0	0	0	0	0	0	0	0	0	0	0	0	0	0	0	0	0	0	0	0	0	0	811	0	0	0	0	0	0	0	0	0	0	0	0	0
helitron-1_dvir base	49	0	0	0	0	0	69	0	0	0	0	0	0	0	0	0	0	0	0	168	0	0	0	0	0	0	0	0	222	0	0	0	0	0	0	40	0	0	0	0	0	0	0	0	0	0	0	0	0
hoyak3 base	306	166	0	0	0	0	0	0	0	0	0	0	0	0	0	0	0	0	0	0	0	0	0	0	0	0	0	0	94	0	0	0	0	0	0	135	0	0	0	0	0	0	0	0	0	0	0	0	0
gypsy-8_dan base	126	564	0	0	0	0	46	0	0	0	0	0	0	0	0	0	0	0	0	0	0	0	0	0	0	0	0	0	56	0	0	0	0	0	0	0	0	0	0	0	0	0	0	0	0	0	0	0	0
i-2_dbi base	168	0	0	0	0	0	109	0	0	0	0	0	0	0	0	0	0	0	0	0	0	0	0	0	0	0	0	0	75	0	0	0	0	0	0	81	0	0	0	0	0	0	0	0	0	0	0	0	0
gypsy-8_dper base	0	0	0	0	0	0	66	0	149	0	0	0	0	0	0	0	0	0	0	51	483	0	0	0	0	0	0	0	41	0	0	0	0	0	0	0	0	0	0	0	0	0	0	0	0	0	0	0	0
bel3_dpse base	0	0	0	0	0	0	62	0	0	0	0	0	0	0	0	0	0	0	0	0	0	0	710	0	0	0	0	0	0	0	0	0	0	0	0	0	0	0	0	0	0	0	0	0	0	0	0	0	0
transib-10_dan base	486	0	0	211	0	0	0	0	0	0	0	0	0	0	0	0	0	0	0	0	0	0	0	0	0	0	0	0	75	0	0	0	0	0	0	0	0	0	0	0	0	0	0	0	0	0	0	0	0
bel-13_dwil base	0	0	0	0	0	0	0	0	0	0	0	0	0	0	0	0	0	0	0	740	0	0	0	0	0	0	0	0	29	0	0	0	0	0	0	0	0	0	0	0	0	0	0	0	0	0	0	0	0
gypsy-12_dta base	0	0	0	0	0	0	0	0	0	0	0	0	0	0	0	0	0	0	0	0	0	0	0	0	0	0	0	0	0	0	0	0	0	0	0	0	0	0	0	0	0	0	0	0	0	0	0	0	0
polinton-1_dgr base	176	0	0	0	0	0	175	0	0	0	0	0	0	0	0	0	0	0	0	92	0	0	0	0	0	0	0	0	61	0	0	0	0	0	0	0	0	0	0	0	0	0	0	0	0	0	0	0	0
gypsy-36_del base	0	509	0	0	0	95	0	0	0	0	0	0	0	0	0	0	0	0	0	124	0	0	0	0	0	0	0	0	0	0	0	0	0	0	0	0	0	0	0	0	0	0	0	0	0	0	0	0	0
cr1-2_drh base	0	0	0	0	0	0	58	0	134	0	0	0	0	0	0	0	0	0	0	0	42	0	90	0	0	0	0	0	351	0	0	0	0	0	0	0	0	0	0	0	0	0	0	0	0	0	0	0	0
gypsy20_dpse base	0	59	0	0	0	0	0	0	0	334	0	0	0	0	0	0	0	0	0	0	0	0	0	0	0	0	0	0	0	0	0	0	0	0	0	333	0	0	0	0	0	0	0	0	0	0	0	0	0
bel2_dmoj base	0	0	0	0	129	0	0	0	0	0	0	0	0	0	0	0	0	0	0	180	0	0	203	0	0	0	0	0	0	0	0	0	0	0	0	0	0	0	0	0	0	0	0	0	0	0	0	0	0
gypsy-12_dvir base	55	0	0	0	0	69	42	0	0	0	0	0	0	0	0	0	0	0	0	0	0	0	67	0	0	0	0	0	263	0	0	0	0	0	0	0	0	0	0	0	0	0	0	0	0	0	0	0	0
jockey-5_df base	0	0	0	719	0	0	0	0	0	0	0	0	0	0	0	0	0	0	0	0	0	0	0	0	0	0	0	0	0	0	0	0	0	0	0	0	0	0	0	0	0	0	0	0	0	0	0	0	0
bel-17_dta base	0	0	0	0	0	283	435	0	0	0	0	0	0	0	0	0	0	0	0	0	0	0	0	0	0	0	0	0	0	0	0	0	0	0	0	0	0	0	0	0	0	0	0	0	0	0	0	0	0
bel-2_dbi base	0	0	0	0	0	0	0	0	0	0	0	0	0	0	0	0	0	0	0	0	0	0	0	0	0	0	0	0	0	0	0	0	0	0	0	712	0	0	0	0	0	0	0	0	0	0	0	0	0
r1-1_dk base	0	0	0	0	0	0	613	0	0	0	0	0	0	0	0	0	0	0	0	0	0	0	0	0	0	0	0	0	0	0	0	0	0	0	0	92	0	0	0	0	0	0	0	0	0	0	0	0	0
gypsy-45_dwil base	0	0	0	0	0	26	630	0	0	37	0	0	0	0	0	0	0	0	0	0	0	0	0	0	0	0	0	0	0	0	0	0	0	0	0	0	0	0	0	0	0	0	0	0	0	0	0	0	0
hopers2 base	133	66	0	0	0	0	272	0	0	0	0	0	0	0	0	0	0	0	0	0	0	0	0	0	0	0	0	0	0	0	0	0	0	0	0	219	0	0	0	0	0	0	0	0	0	0	0	0	0
mariner-6_df base	0	0	0	0	0	0	439	0	0	0	0	0	0	0	0	0	0	0	0	0	0	0	0	0	0	0	0	0	241	0	0	0	0	0	0	0	0	0	0	0	0	0	0	0	0	0	0	0	0
transib-1_dbi base	0	0	0	0	0	0	0	0	0	0	0	0	0	0	0	0	0	0	0	0	0	0	0	0	0	0	0	0	678	0	0	0	0	0	0	0	0	0	0	0	0	0	0	0	0	0	0	0	0
rte-1_dan base	0	0	0	0	0	0	279	0	0	0	0	0	0	0	0	0	0	0	0	0	0	0	0	0	0	0	0	0	393	0	0	0	0	0	0	0	0	0	0	0	0	0	0	0	0	0	0	0	0
gypsy-14_dfi base	0	0	0	0	0	0	0	0	0	0	0	0	0	0	0	0	0	0	0	553	0	0	0	0	0	0	0	0	0	0	0	0	0	0	0	116	0	0	0	0	0	0	0	0	0	0	0	0	0
gypsy-43_dwil base	0	0	0	0	0	0	0	0	0	0	0	0	0	0	0	0	0	0	0	515	0	0	0	0	0	0	0	0	38	0	0	0	0	0	0	0	0	0	0	0	0	0	0	0	0	0	0	0	0
gypsy4_dmoj base	0	0	0	0	0	0	104	0	0	0	0	0	0	0	0	0	0	0	0	67	0	0	0	0	0	0	0	0	87	0	0	0	0	0	0	0	0	0	0	0	0	0	0	0	0	0	0	0	0
r1_dmo base	118	0	0	0	0	0	303	0	0	0	0	0	0	0	0	0	0	0	0	112	0	0	0	0	0	0	0	0	0	0	0	0	0	0	0	0	0	0	0	0	0	0	0	0	0	0	0	0	0
jockey-3_dbp base	0	0	338	0	0	0	0	0	0	0	0	0	0	0	0	0	0	0	0	0	0	0	0	0	0	0	0	0	0	0	0	0	0	0	0	0	0	0	0	0	0	0	0	0	0	0	0	0	0
mariner-5_del base	0	0	0	0	664	0	0	0	0	0	0	0	0	0	0	0	0	0	0	0	0	0	0	0	0	0	0	0	0	0	0	0	0	0	0	0	0	0	0	0	0	0	0	0	0	0	0	0	0
r1_dps base	0	0	0	0	0	0	99	0	0	0	0	0	0	0	0	0	0	0	0	96	0	0	0	0	0	0	0	0	336	0	0	0	0	0	0	0	0	0	0	0	0	0	0	0	0	0	0	0	0
bel-5_dfi base	0	0	0	0	0	0	0	0	0	658	0	0	0	0	0	0	0	0	0	0	0	0	0	0	0	0	0	0	0	0	0	0	0	0	0	0	0	0	0	0	0	0	0	0	0	0	0	0	0
helitron1_dmoj base	123	0	0	0	0	0	146	0	0	0	0	0	0	0	0	0	0	0	0	0	0	0	0	0	0	0	0	0	193	0	0	0	0	0	0	0	0	0	0	0	0	0	0	0	0	0	0	0	0
mariner-15_df base	40	0	0	0	0	0	34	0	0	0	0	0	0	0	0	0	0	0	0	245	0	0	94	0	0	0	0	0	33	0	0	0	0	0	0	0	0	0	0	0	0	0	0	0	0	0	0	0	0
marina base	0	0	0	172	0	0	417	0	0	0	0	0	0	0	0	0	0	0	0	0	0	0	0	0	0	0	0	0	61	0	0	0	0	0	0	0	0	0	0	0	0	0	0	0	0	0	0	0	0
gypsy-53_dwil base	0	0	0	0	0	33	0	0	33	0	0	0	0	0	0	0	0	0	0	13	0	0	33	0	0	0	0	0	46	0	0	0	0	0	0	0	0	0	0	0	0	0	0	0	0	0	0	0	0
copia-5_dwil base	0	0	0	0	0	0	0	0	0	532	0	0	0	0	0	0	0	0	0	0	0	0	0	0	0	0	0	0	0	0	0	0	0	0	0	0	0	0	0	0	0	0	0	0	0	0	0	0	0
loa-2_dta base	0	0	0	0	0	0	0	0	0	0	0	0	0	0	0	0	0	0	0	0	0	0	0	0	0	0	0	0	603	0	0	0	0	0	0	0	0	0	0	0	0	0	0	0	0	0	0	0	0
bel-3_dwil base	0	0	0	0	0	0	0	0	0	420	0	0	0	0	0	0	0	0	0	182	0	0	0	0	0	0	0	0	0	0	0	0	0	0	0	0	0	0	0	0	0	0	0	0	0	0	0	0	0
jockey-9_dper base	0	0	0	0	0	0	56	0	0	0	0	0	0	0	0	0	0	0	0	142	0	0	0	0	0	0	0	0	172	0	0	0	0	0	0	0	0	0	0	0	0	0	0	0	0	0	0	0	0
jockey-3_deu base	327	0	0	0	0	0	257	0	0	0	0	0	0	0	0	0	0	0	0	0	0	0	0	0	0	0	0	0	0	0	0	0	0	0	0	0	0	0	0	0	0	0	0	0	0	0	0	0	0
copia-5_dan base	0	0	0	0	0	0	0	0	0	532	0	0	0	0	0	0	0	0	0	0	0	0	0	0	0	0	0	0	39	0	0	0	0	0	0	0	0	0	0	0	0	0	0	0	0	0	0	0	0
jockey-1_dan base	0	0	0	0	0	0	333	0	0	163	0	0	0	0	0	0	0	0	0	0	0	0	0	0	0	0	0	0	0	0	0	0	0	0	0	0	0	0	0	0	0	0	0	0	0	0	0	0	0
bel-1_dbp base	0	0	0	0	0	469	0	0	0	0	0	0	0	0	0	0	0	0	0	43	0	0	52	0	0	0	0	0	0	0	0	0	0	0	0	0	0	0	0	0	0	0	0	0	0	0	0	0	0
helitron1_dm base	0	0	0	0	0	0	0	0	0	0	0	0	0	0	0	0	0	0	0	0	0	0	0	0	0	0	0	0	0	0	0	0	0	0	0	0	0	0	0	0	0	0	0	0	0	0	0	0	0
gypsy10_dpse base	0	67	0	0	0	0	0	0	0	0	0	0	0	0	0	0	0	0	0	100	0	0	0	0	0	0	0	0	26	0	0	0	0	0	0	0	0	0	0	0	0	0	0	0	0	0	0	0	0
inv2j_db base	105	0	0	0	0	0	196	0	0	0	0	0	0	0	0	0	0	0	0	40	0	0	0	0	0	0	0	0	85	0	0	0	0	0	0	0	0	0	0	0	0	0	0	0	0	0	0	0	0
jockey-5_dvi base	0	0	0	0	0	0	197	0	0	0	0	0	0	0	0	0	0	0	0	51	0	0	0	0	0	0	0	0	61	0	0	0	0	0	0	0	0	0	0	0	0	0	0	0	0	0	0	0	0
transib-11_dan base	130	0	0	0	0	0	0	0	0	0	0	0	0	0	0	0	0	0	0	0	0	0	0	0	0	0	0	0	0	0	0	0	0	0	0	103	0	0	0	0	0	0	0	0	0	0	0	0	0
mariner-1_dpe base	0	0	0	0	0	0	345	0	0	0	0	0	0	0	0	0	0	0	0	97	0	0	0	0	0	0	0	0	0	0	0	0	0	0	0	0	0	0	0	0	0	0	0	0	0	0	0	0	0
i-5_dbi base	0	0	0	0	0	0	0	0	0	0	0	0	0	0	0	0	0	0	0	0	0	0	0	0	0	0	0	0	66	0	0	0	0	0	0	190	0	0	0	0	0	0	0	0	0	0	0	0	0
helitron-n1_dbp base	47	0	0	0	0	0	0	0	0	0	0	0	0	0	0	0	0	0	0	38	0	0	0	0	0	0	0	0	177	0	0	0	0	0	0	256	0	0	0	0	0	0	0	0	0	0	0	0	0
mudr-1_del base	123	0	0	0	0	0	0	0	0	0	0	0	0	0	0	0	0	0	0	0	237	0	0	0	0	0	0	0	65	0	0	0	0	0	0	87	0	0	0	0	0	0	0	0	0	0	0	0	0
gypsy24_dpse base	60	0	0	0	0	0	118	0	0	0	0	0	0	0	0	0	0	0	0	45	0	0	0	0	0	0	0	0	48	0	0	0	0	0	0	0	0	0	0	0	0	0	0	0	0	0	0	0	0
bel-5_dvir base	51	0	0	0	0	0	61	0	0	0	0	0	0	0	0	0	0	0	0	37	0	0	0	0	0	0	0	0	101	0	0	0	0	0	0	0	0	0	0	0	0	0	0	0	0	0	0	0	0
transib-2_drh base	0	420	0	0	0	0	0	0	0	0	0	0	0	0	0	0	0	0	0	0	0	0	0	0	0	0	0	0	87	0	0	0	0	0	0	0	0	0	0	0	0	0	0	0	0	0	0	0	0
gypsy-19_del base	0	0	284	0	0	0	0	0	0	0	0	0	0	0	0	0	0	0	0	0	0	0	0	0	0	0	0	0	0	0	0	0	0	0	0	0	0	0	0	0	0	0	0	0	0	0	0	0	0
mariner-11_dan base	0	0	0	0	0	0	0	0	0	0	0	0	0	0	0	0	0	0	0	406	0	0	0	0	0	0	0	0	0	0	0	0	0	0	0	0	0	0	0	0	0	0	0	0	0	0	0	0	0
jockey-6_dan base	146	0	0	0	0	0	0	0	0	0	0	0	0	0	0	0	0	0	0	0	0	0	0	0	0	0	0	0	57	0	0	0	0	0	0	293	0	0	0	0	0	0	0	0	0	0	0	0	0
hat-6_drh base	0	0	0	0	0	0	95	0	0	0	0	0	0	0	0	0	0	0	0	0	0	0	0	0	0	0	0	0	129	0	0	0	0	0	0	56	0	0	0	0	0	0	0	0	0	0	0	0	0
homo10 base	0	0	0	0	0	0	118	0	0	0	0	0	0	0	0	0	0	0	0	34	0	0	0	0	0	0	0	0	227	0	0	0	0	0	0	0	0	0	0	0	0	0	0	0	0	0	0	0	0
r1-1_dbi base	0	0	0	0	0	0	0	0	0	0	0	0	0	0	0	0	0	0	0	0	0	0	0	0	0	0	0	0	0	0	0	0	0	0	0	0	0	0	0	0	0	0	0	0	0	0	0	0	0
loa-3_dper base	0	0	0	0	0	0	0	0	0	0	0	0	0	0	0	0	0	0	0	0	0	0	0	0	0	0	0	0	479	0	0	0	0	0	0	0	0	0	0	0	0	0	0	0	0	0	0	0	0
jockey-6_df base	0	0	0	0	0	0	112	0	0	0	0	0	0	0	0	0	0	0	0	173	140	0	0	0	0	0	0	0	50	0	0	0	0	0	0	0	0	0	0	0	0	0	0	0	0	0	0	0	0
cr1-10_dta base	0	0	336	0	0	70	0	0	0	0	0	0	0	0	0	0	0	0	0	0	0	0	0	0	0	0	0	0	0	0	0	0	0	0	0	0	0	0	0	0	0	0	0	0	0	0	0	0	0
gypsy-11_dta base	164	307	0	0	0	0	0	0	0	0	0	0	0	0	0	0	0	0	0	0	0	0	0	0	0	0	0	0	0	0	0	0	0	0	0	0	0	0	0	0	0	0	0	0	0	0	0	0	0
copia-2_del base	48	0	0	0	0	0	0	0	0	0	0	0	0	0	0	0	0	0	0	0	210	0	0	0	0	0	0	0	0	0	0	0	0	0	0	0	0	0	0	0	0	0	0	0	0	0	0	0	0
hat-1_drh base	60	0	0	0	0	0	0	0	0	0	0	0	0	0	0	0	0	0	0	137	0	0	0	0	0	0	0	0	0	0	0	0	0	0	0	0	0	0	0	0	0	0	0	0	0	0	0	0	0
gypsy-5_dwil base	0	0	0	0	0	0	72	0	124	0	0	0	0	0	0	0	0	0	0	0	0	0	0	0	0	0	0	0	62	0	0	0	0	0	0	0	0	0	0	0	0	0	0	0	0	0	0	0	0
copia-3_dwil base	0	0	110	0	0	254	0	0	0	0	0	0	0	0	0	0	0	0	0	0	0	0	99	0	0	0	0	0	0	0	0	0	0	0	0	0	0	0	0	0	0	0	0	0	0	0	0	0	0
gypsy-4_dan base	46	0	0	0	0	0	0	0	0	0	0	0	0	0	0	0	0	0	0	411	0	0	0	0	0	0	0	0	0	0	0	0	0	0	0	0	0	0	0	0	0	0	0	0	0	0	0	0	0
bel-4_dvir base	0	0	0	0	0	0	397	0	0	0	0	0	0	0	0	0	0	0	0	0	0	0	0	0	0	0	0	0	0	0	0	0	0	0	0	0	0	0	0	0	0	0	0	0	0	0	0	0	0
gypsy-11_del base	46	0	0	0	0	0	406	0	0	0	0	0	0	0	0	0	0	0	0	0	0	0	0	0	0	0	0	0	0	0	0	0	0	0	0	0	0	0	0	0	0	0	0	0	0	0	0	0	0
bel-10_dwil base	39	0	0	0	0	0	0	0	0	0	0	0	0	0	0	0	0	0	0	0	0	0	0	0	0	0	0	0	161	0	0	0	0	0	0	0	0	0	0	0	0	0	0	0	0	0	0	0	0
mariner-19_df base	0	0	0	0	0	0	448	0	0	0	0	0	0	0	0	0	0	0	0	0	0	0	0	0	0	0	0	0	0	0	0	0	0	0	0	0	0	0	0	0	0	0	0	0	0	0	0	0	0
gypsy21_dpse base	0	0	0	0	0	0	0	0	448	0	0	0	0	0	0	0	0	0	0	0	0	0	0	0	0	0	0	0	0	0	0	0	0	0	0	0	0	0	0	0	0	0	0	0	0	0	0	0	0
isfun1 base	38	36	0	0	0	0	158	0	0	0	0	0	0	0	0	0	0	0	0	56	0	0	0	0	0	0	0	0	114	0	0	0	0	0	0	0	0	0	0	0	0	0	0	0	0	0	0	0	0
hoana7 base	119	0	0	0	0	0	35	0	0	0	0	0	0	0	0	0	0	0	0	152	0	0	0	0	0	0	0	0	0	0	0	0	0	0	0	0	0	0	0	0	0	0	0	0	0	0	0	0	0
jockey-1_dbp base	0	0	0	0	0	0	0	0	0	0	0	0	0	54	54	0	0	0	0	276	0	0	0	0	0	0	0	0	0	0	0	0	0	0	0	0	0	0	0	0	0	0	0	0	0	0	0	0	0
jockey-3_dya base	0	0	0	0	0	0	0	0	0	0	0	0	0	0	0	0	0	0	0	62	0	0	0	0	0	0	0	0	0	0	0	0	0	0	0	0	0	0	0	0	0	0	0	0	0	0	0	0	0
helitron-5_drh base	0	0	0	0	122	0	161	0	0	0	0	0	0	0	0	0	0	0	0	73	0	0	0	0	0	0	0	0	0	0	0	0	0	0	0	0	0	0	0	0	0	0	0	0	0	0	0	0	0
harbinger-1_dw base	66	202	0	0	0	0	0	0	0	0	0	0	0	0	0	0	0	0	0	78	0	0	0	0	0	0	0	0	81	0	0	0	0	0	0	0	0	0	0	0	0	0	0	0	0	0	0	0	0
dna8-1_del base	0	0	0	0	0	0	0	0	0	0	0	0	0	0	0	0	0	0	0	135	0	0	0	0	0	0	0	0	41	0	0	0	0	0	0	0	0	0	0	0	0	0	0	0	0	0	0	0	0
r1a_dan base	0	0	0	0	0	0	78	0	0	0	0	0	0	0	0	0	0	0	0	0	0	0	58	0	0	0	0	0	272	0	0	0	0	0	0	0	0	0	0	0	0	0	0	0	0	0	0	0	0
gypsy2_dv base	0	0	0	0	0	0	38	0	0	66	0	0	0	0	0	0	0	0	0	0	0	0	0	0	0	0	0	0	0	0	0	0	0	0	0	0	0	0	0	0	0	0	0	0	0	0	0	0	0
gypsy-2_dgri base	0	0	0	0	0	0	0	0	0	0	0	0	0	0	0	0	0	0	0	0	339	0	0	0	0	0	0	0	0	0	0	0	0	0	0	0	0	0	0	0	0	0	0	0	0	0	0	0	0
r2b_dm base	0	0	0	0	0	0	0	0	0	0	0	0	0	0	0	0	0	0	0	0	0	0	0	0	0	0	0	0	0	0	0	0	0	0	0	0	0	0	0	0	0	0	0	0	0	0	0	0	0
i-1_del base	0	391	0	0	0	0	0	0	0	0	0	0	0	0	0	0	0	0	0	0	0	0	0	0	0	0	0	0	0	0	0	0	0	0	0	0	0	0	0	0	0	0	0	0	0	0	0	0	0
gypsy1_dmoj base	0	0	0	0	0	0	0	0	124	0	0	0	0	0	0	0	0	0	0	51	0	0	0	0	0	0	0	0	0	0	0	0	0	0	0	0	0	0	0	0	0	0	0	0	0	0	0	0	0
outcast-1_dbi base	0	0	0	0	0	0	54	0	0	0	0	0	0	0	0	0	0	0	0	0	0	0	0	0	0	0	0	0	73	0	0	0	0	0	0	107	0	0	0	0	0	0	0	0	0	0	0	0	0
gypsy-38_dwil base	155	0	0	0	0	0	0	0	0	0	0	0	0	0	0	0	0	0	0	103	0	0	0	0	0	0	0	0	123	0	0	0	0	0	0	0	0	0	0	0	0	0	0	0	0	0	0	0	0
bel-7_dpe base	45	0	0	0	0	0	0	0	0	0	0	0	0	0	0	0	0	0	0	0	0	0	0	0	0	0	0	0	46	0	0	0	0	0	0	0	0	0	0	0	0	0	0	0	0	0	0	0	0
gypsy-13_dbi base	0	0	0	0	0	0	379	0	0	0	0	0	0	0	0	0	0	0	0	0	0	0	0	0	0	0	0	0	0	0	0	0	0	0	0	0	0	0	0	0	0	0	0	0	0	0	0	0	0
gypsy-9_dta base	0	0	0	0	0	0	52	0	0	0	0	0	0	0	0	0	0	0	0	0	0	0	0	0	0	0	0	0	0	0	0	0	0	0	0	0	0	0	0	0	0	0	0	0	0	0	0	0	0
tabor_da base	0	0	0	0	0	0	0	0	0	0	0	0	0	0	0	0	0	0	0	65	74	0	0	148	0	0	0	0	0	0	0	0	0	0	0	0	0	0	0	0	0	0	0	0	0	0	0	0	0
gypsy19_dya base	0	139	0	0	0	0	0	0	0	0	0	0	0	0	0	0	0	0	0	0	0	0	0	0	0	0	0	0	60	0	0	0	0	0	0	0	0	0	0	0	0	0	0	0	0	0	0	0	0
gypsy17_dpse base	0	0	0	0	0	0	0	0	17	0	0	0	0	0	0	0	0	0	0	50	0	0	50	33	0	0	0	0	0	0	0	0	0	0	0	0	0	0	0	0	0	0	0	0	0	0	0	0	0
gypsy-33_del base	0	0	0	0	0	0	138	0	0	0	0	0	0	0	0	0	0	0	0	143	0	0	0	0	0	0	0	0	0	0	0	0	0	0	0	73	0	0	0	0	0	0	0	0	0	0	0	0	0
hat-5_dbp base	43	0	0	0	0	0	0	0	0	0	0	0	0	0	0	0	0	0	0	40	0	0	0	0	0	0	0	0	0	0	0	0	0	0	0	0	0	0	0	0	0	0	0	0	0	0	0	0	0
copia-4_dgri base	0	0	0	0	0	0	0	0	0	0	0	0	0	0	0	0	0	0	0	0	0	0	0	0	0	0	0	0	123	0	0	0	0	0	0	0	0	0	0	0	0	0	0	0	0	0	0	0	0
hat-2_dbp base	0	0	0	0	0	0	0	0	0	0	0	0	0	0	0	0	0	0	0	0	0	0	0	0	0	0	0	0	146	0	0	0	0	0	0	0	0	0	0	0	0	0	0	0	0	0	0	0	0
helitron-1_dana base	87	0	0	0	0	249	0	0	0	0	0	0	0	0	0	0	0	0	0	0	0	0	0	0	0	0	0	0	0	0	0	0	0	0	0	0	0	0	0	0	0	0	0	0	0	0	0	0	0
gypsy-13_dan base	0	0	0	0	0	0	0	0	0	67	0	0	0	0	0	0	0	0	0	93	0	0	0	0	0	0	0	0	0	0	0	0	0	0	0	0	0	0	0	0	0	0	0	0	0	0	0	0	0
i-1_dbp base	0	0	0	0	0	263	0	0	0	0	0	0	0	0	0	0	0	0	0	0	0	0	0	0	0	0	0	0	68	0	0	0	0	0	0	0	0	0	0	0	0	0	0	0	0	0	0	0	0
mariner-24_df base	0	0	0	0	0	0	330	0	0	0	0	0	0	0	0	0	0	0	0	0	0	0	0	0	0	0	0	0	0	0	0	0	0	0	0	0	0	0	0	0	0	0	0	0	0	0	0	0	0
mariner-3_dk base	0	0	0	0	0	0	0	0	0	0	0	0	0	0	0	0	0	0	0	0	0	0	0	0	0	0	0	0	0	0	0	0	0	0	0	0	0	0	0	0	0	0	0	0	0	0	0	0	0
hat-3_dbp base	0	0	0	0	0	0	0	0	100	0	0	0	0	0	0	0	0	0	0	0	0	0	0	0	0	0	0	0	99	0	0	0	0	0	0	34	0	0	0	0	0	0	0	0	0	0	0	0	0
hat-2_df base	0	0	0	258	0	0	62	0	0	0	0	0	0	0	0	0	0	0	0	0	0	0	0	0	0	0	0	0	0	0	0	0	0	0	0	0	0	0	0	0	0	0	0	0	0	0	0	0	0
hat-4_dbp base	69	0	0	0	0	0	54	0	0	0	0	0	0	0	0	0	0	0	0	55	0	0	0	0	0	0	0	0	91	0	0	0	0	0	0	0	0	0	0	0	0	0	0	0	0	0	0	0	0
gypsy-37_dwil base	0	0	0	0	0	0	0	0	0	0	0	0	0	0	0	0	0	0	0	311	0	0	0	0	0	0	0	0	0	0	0	0	0	0	0	0	0	0	0	0	0	0	0	0	0	0	0	0	0
cr1-6_dt base	0	0	0	0	0	310	0	0	0	0	0	0	0	0	0	0	0	0	0	0	0	0	0	0	0	0	0	0	0	0	0	0	0	0	0	0	0	0	0	0	0	0	0	0	0	0	0	0	0
gypsy-41_del base	0	0	0	0	0	0	42	0	0	0	0	0	0	0	0	0	0	0	0	0	0	0	0	0	0	0	0	0	180	0	0	0	0	0	0	0	0	0	0	0	0	0	0	0	0	0	0	0	0
mariner-6_dbi base	74	0	0	0	0	0	0	0	0	0	0	0	0	0	0	0	0	0	0	0	0	0	233	0	0	0	0	0	0	0	0	0	0	0	0	0	0	0	0	0	0	0	0	0	0	0	0	0	0
jockey-1_dper base	73	0	0	0	0	0	0	0	0	0	0	0	0	0	0	0	0	0	0	67	0	0	0	0	0	0	0	0	71	0	0	0	0	0	0	0	0	0	0	0	0	0	0	0	0	0	0	0	0
mudr-1_df base	0	0	0	0	0	0	0	0	0	0	0	0	0	0	0	0	0	0	0	0	0	0	0	0	0	0	0	0	51	0	0	0	0	0	0	0	0	0	0	0	0	0	0	0	0	0	0	0	0
gypsy-33_dan base	0	0	0	0	0	0	0	0	0	0	0	0	0	0	0	0	0	0	0	302	0	0	0	0	0	0	0	0	0	0	0	0	0	0	0	0	0	0	0	0	0	0	0	0	0	0	0	0	0
gypsy15_dpse base	0	0	0	0	0	0	0	0	259	0	0	0	0	0	0	0	0	0	0	0	0	0	0	0	0	0	0	0	40	0	0	0	0	0	0	0	0	0	0	0	0	0	0	0	0	0	0	0	0
gypsy-3_dbi base	0	298	0	0	0	0	0	0	0	0	0	0	0	0	0	0	0	0	0	0	0	0	0	0	0	0	0	0	0	0	0	0	0	0	0	0	0	0	0	0	0	0	0	0	0	0	0	0	0
jockey-13_dan base	0	0	0	0	0	0	0	0	0	0	0	0	0	0	0	0	0	0	0	48	84	0	0	0	0	0	0	0	0	0	0	0	0	0	0	0	0	0	0	0	0	0	0	0	0	0	0	0	0
uvir_dv base	105	0	0	0	0	0	0	0	0	0	0	0	0	0	0	0	0	0	0	53	0	0	0	0	0	0	0	0	65	0	0	0	0	0	0	0	0	0	0	0	0	0	0	0	0	0	0	0	0
gypsy-47_del base	0	0	0	0	0	42	66	0	56	129	0	0	0	0	0	0	0	0	0	0	0	0	0	0	0	0	0	0	0	0	0	0	0	0	0	0	0	0	0	0	0	0	0	0	0	0	0	0	0
fushi_dm base	0	0	0	0	0	0	0	0	0	0	0	0	0	0	0	0	0	0	0	0	0	0	0	0	0	0	0	0	291	0	0	0	0	0	0	0	0	0	0	0	0	0	0	0	0	0	0	0	0
mariner-8_df base	0	0	0	0	0	0	0	0	0	0	0	0	0	0	0	0	0	0	0	0	0	0	0	0	0	0	0	0	0	0	0	0	0	0	0	291	0	0	0	0	0	0	0	0	0	0	0	0	0
gypsy-10_dwil base	0	0	0	0	0	0	289	0	0	0	0	0	0	0	0	0	0	0	0	0	0	0	0	0	0	0	0	0	0	0	0	0	0	0	0	0	0	0	0	0	0	0	0	0	0	0	0	0	0
r1-3_deu base	0	0	0	0	0	0	187	0	0	0	0	0	0	0	0	0	0	0	0	99	0	0	0	0	0	0	0	0	0	0	0	0	0	0	0	0	0	0	0	0	0	0	0	0	0	0	0	0	0
gypsy-46_del base	283	0	0	0	0	0	0	0	0	0	0	0	0	0	0	0	0	0	0	0	0	0	0	0	0	0	0	0	0	0	0	0	0	0	0	0	0	0	0	0	0	0	0	0	0	0	0	0	0
transib-3_drh base	0	0	0	0	0	0	0	0	0	0	0	0	0	0	0	0	0	0	0	282	0	0	0	0	0	0	0	0	0	0	0	0	0	0	0	0	0	0	0	0	0	0	0	0	0	0	0	0	0
copia-1_dbp base	0	0	0	0	0	0	0	0	0	0	0	0	0	0	0	0	0	0	0	280	0	0	0	0	0	0	0	0	0	0	0	0	0	0	0	0	0	0	0	0	0	0	0	0	0	0	0	0	0
gypsy-2_dbi base	0	0	0	0	0	0	231	0	0	0	0	0	0	0	0	0	0	0	0	47	0	0	0	0	0	0	0	0	0	0	0	0	0	0	0	0	0	0	0	0	0	0	0	0	0	0	0	0	0
bel-2_drh base	0	0	0	0	0	0	276	0	0	0	0	0	0	0	0	0	0	0	0	0	0	0	0	0	0	0	0	0	0	0	0	0	0	0	0	0	0	0	0	0	0	0	0	0	0	0	0	0	0
homo9 base	0	0	0	0	0	0	38	0	0	0	0	0	0	0	0	0	0	0	0	52	0	0	0	0	0	0	0	0	48	0	0	0	0	0	0	0	0	0	0	0	0	0	0	0	0	0	0	0	0
gypsy12_dpse base	0	0	0	0	0	0	49	0	0	0	0	0	0	0	0	0	0	0	0	142	0	0	0	0	0	0	0	0	0	0	0	0	0	0	0	80	0	0	0	0	0	0	0	0	0	0	0	0	0
mariner-13_df base	0	271	0	0	0	0	0	0	0	0	0	0	0	0	0	0	0	0	0	0	0	0	0	0	0	0	0	0	0	0	0	0	0	0	0	0	0	0	0	0	0	0	0	0	0	0	0	0	0
mariner-4_drh base	0	0	0	0	0	0	184	0	0	0	0	0	0	0	0	0	0	0	0	82	0	0	0	0	0	0	0	0	0	0	0	0	0	0	0	0	0	0	0	0	0	0	0	0	0	0	0	0	0
bel-8_del base	0	0	0	0	0	0	0	0	0	0	0	0	0	0	0	0	0	0	0	0	0	0	0	0	0	0	0	0	0	0	0	0	0	0	0	0	0	0	0	0	0	0	0	0	0	0	0	0	0
gypsy_ds base	0	0	0	0	0	84	56	0	81	0	0	0	0	0	0	0	0	0	0	0	0	0	0	0	0	0	0	0	0	0	0	0	0	0	0	0	0	0	0	0	0	0	0	0	0	0	0	0	0
mariner-14_dk base	0	0	0	0	0	0	144	0	0	0	0	0	0	0	0	0	0	0	0	0	0	0	0	0	0	0	0	0	0	0	0	0	0	0	0	0	0	0	0	0	0	0	0	0	0	0	0	0	0
jockey-4_dan base	0	0	0	0	0	0	0	0	0	0	0	0	0	0	0	0	0	0	0	159	0	0	0	0	0	0	0	0	0	0	0	0	0	0	0	0	0	0	0	0	0	0	0	0	0	0	0	0	0
mariner-6_drh base	0	0	0	0	0	0	263	0	0	0	0	0	0	0	0	0	0	0	0	0	0	0	0	0	0	0	0	0	0	0	0	0	0	0	0	0	0	0	0	0	0	0	0	0	0	0	0	0	0
helitron-7_drh base	0	0	0	0	0	0	0	0	0	0	0	0	0	0	0	0	0	0	0	0	0	0	0	0	0	0	0	0	159	0	0	0	0	0	0	0	0	0	0	0	0	0	0	0	0	0	0	0	0
gypsy-26_del base	0	0	0	0	0	70	0	0	0	0	0	0	0	0	0	0	0	0	0	0	0	0	0	0	0	0	0	0	0	0	0	0	0	0	0	0	0	0	0	0	0	0	0	0	0	0	0	0	0
gypsy-8_deu base	0	0	0	0	0	0	261	0	0	0	0	0	0	0	0	0	0	0	0	0	0	0	0	0	0	0	0	0	0	0	0	0	0	0	0	0	0	0	0	0	0	0	0	0	0	0	0	0	0
i-1_dan base	0	0	0	0	0	0	0	0	0	0	0	0	0	0	0	0	0	0	0	0	0	0	0	0	0	0	0	0	0	0	0	0	0	0	0	0	0	0	0	0	0	0	0	0	0	0	0	0	0
jockey-6_dper base	0	0	0	0	0	0	0	0	0	0	0	0	0	0	0	0	0	0	0	78	0	0	0	0	0	0	0	0	0	0	0	0	0	0	0	0	0	0	0	0	0	0	0	0	0	0	0	0	0
gypsy-19_dwil base	52	0	0	0	0	0	62	0	0	0	0	0	0	0	0	0	0	0	0	65	0	0	0	0	0	0	0	0	26	0	0	0	0	0	0	0	0	0	0	0	0	0	0	0	0	0	0	0	0
helitron-n1_dan base	59	0	0	0	0	0	194	0	0	0	0	0	0	0	0	0	0	0	0	0	0	0	0	0	0	0	0	0	0	0	0	0	0	0	0	0	0	0	0	0	0	0	0	0	0	0	0	0	0
bel-21_dan base	36	0	0	0	0	0	0	0	0	0	0	0	0	0	0	0	0	0	0	98	0	0	0	0	0	0	0	0	0	0	0	0	0	0	0	0	0	0	0	0	0	0	0	0	0	0	0	0	0
hat-n1_del base	0	0	0	0	0	0	79	0	0	0	0	0	0	0	0	0	0	0	0	0	0	0	0	0	0	0	0	0	0	0	0	0	0	0	0	0	0	0	0	0	0	0	0	0	0	0	0	0	0
cr1-4_dk base	0	171	0	0	0	0	0	0	0	0	0	0	0	0	0	0	0	0	0	78	0	0	0	0	0	0	0	0	0	0	0	0	0	0	0	0	0	0	0	0	0	0	0	0	0	0	0	0	0
hat-1n_dp base	0	0	0	0	0	0	88	0	0	0	0	0	0	0	0	0	0	0	0	0	0	0	0	0	0	0	0	0	84	0	0	0	0	0	0	0	0	0	0	0	0	0	0	0	0	0	0	0	0
hat-5n1_dk base	0	0	0	0	0	0	0	0	241	0	0	0	0	0	0	0	0	0	0	0	0	0	0	0	0	0	0	0	0	0	0	0	0	0	0	0	0	0	0	0	0	0	0	0	0	0	0	0	0
r1-3b_del base	0	0	0	0	0	0	0	0	0	0	0	0	0	0	0	0	0	0	0	0	0	0	0	0	0	0	0	0	106	0	0	0	0	0	0	0	0	0	0	0	0	0	0	0	0	0	0	0	0
jockey-4_dsim base	0	234	0	0	0	0	0	0	0	0	0	0	0	0	0	0	0	0	0	0	0	0	0	0	0	0	0	0	0	0	0	0	0	0	0	0	0	0	0	0	0	0	0	0	0	0	0	0	0
gypsy-12_dwil base	0	0	0	0	0	0	80	0	0	0	0	0	0	0	0	0	0	0	0	0	0	0	0	0	0	0	0	0	152	0	0	0	0	0	0	0	0	0	0	0	0	0	0	0	0	0	0	0	0
bel-13_dta base	0	0	0	0	0	0	78	0	0	0	0	0	0	0	0	0	0	0	0	0	0	0	0	0	0	0	0	0	0	0	0	0	0	0	0	154	0	0	0	0	0	0	0	0	0	0	0	0	0
bel-20_dta base	0	0	0	0	0	0	94	0	0	0	0	0	0	0	0	0	0	0	0	0	0	0	0	0	0	0	0	0	0	0	0	0	0	0	0	0	0	0	0	0	0	0	0	0	0	0	0	0	0
hat-n1_dk base	69	0	0	0	0	0	118	0	0	0	0	0	0	0	0	0	0	0	0	0	0	0	0	0	0	0	0	0	0	0	0	0	0	0	0	0	0	0	0	0	0	0	0	0	0	0	0	0	0
dtripu2cons base	0	0	0	0	0	0	0	0	0	0	0	0	0	0	0	0	0	0	0	0	0	0	0	0	0	0	0	0	227	0	0	0	0	0	0	0	0	0	0	0	0	0	0	0	0	0	0	0	0
transib-1_dk base	0	0	0	0	0	0	140	0	0	86	0	0	0	0	0	0	0	0	0	0	0	0	0	0	0	0	0	0	0	0	0	0	0	0	0	0	0	0	0	0	0	0	0	0	0	0	0	0	0
gypsy-2_dwil base	0	0	0	0	0	0	0	0	0	0	0	0	0	0	0	0	0	0	0	0	223	0	0	0	0	0	0	0	0	0	0	0	0	0	0	0	0	0	0	0	0	0	0	0	0	0	0	0	0
cr1-1_df base	0	0	0	0	0	0	0	0	0	0	0	0	0	0	0	0	0	0	0	102	0	0	0	0	0	0	0	0	0	0	0	0	0	0	0	0	0	0	0	0	0	0	0	0	0	0	0	0	0
bel-15_dta base	0	0	0	0	0	0	0	0	0	0	0	0	0	0	0	0	0	0	0	0	0	0	0	0	0	0	0	0	0	0	0	0	0	0	0	160	0	0	0	0	0	0	0	0	0	0	0	0	0
gypsy-46_dwil base	0	142	0	0	0	0	0	0	0	0	0	0	0	0	0	0	0	0	0	0	0	0	73	0	0	0	0	0	0	0	0	0	0	0	0	0	0	0	0	0	0	0	0	0	0	0	0	0	0
spock_dmi base	163	0	0	0	0	0	0	0	0	0	0	0	0	0	0	0	0	0	0	0	0	0	0	0	0	0	0	0	47	0	0	0	0	0	0	0	0	0	0	0	0	0	0	0	0	0	0	0	0
transib-4_dbi base	103	0	0	0	0	0	0	0	0	0	0	0	0	0	0	0	0	0	0	0	0	0	42	0	0	0	0	0	0	0	0	0	0	0	0	0	0	0	0	0	0	0	0	0	0	0	0	0	0
i-3_dan base	0	0	0	0	0	0	0	0	0	0	0	0	0	0	0	0	0	0	0	90	0	0	0	0	0	0	0	0	0	0	0	0	0	0	0	119	0	0	0	0	0	0	0	0	0	0	0	0	0
cr1-4_drh base	0	0	0	0	0	0	0	0	0	0	0	0	0	0	0	0	0	0	0	0	0	0	0	0	0	0	0	0	0	0	0	0	0	0	0	0	0	0	0	0	0	0	0	0	0	0	0	0	0
polinton-1_dbi base	106	0	0	0	0	38	0	0	0	0	0	0	0	0	0	0	0	0	0	0	0	0	0	0	0	0	0	0	0	0	0	0	0	0	0	0	0	0	0	0	0	0	0	0	0	0	0	0	0
jockey-2_deu base	0	0	0	0	0	0	132	0	0	0	0	0	0	0	0	0	0	0	0	0	0	0	0	0	0	0	0	0	0	0	0	0	0	0	0	0	0	0	0	0	0	0	0	0	0	0	0	0	0
r1_dvi base	37	0	0	0	0	0	42	0	0	0	0	0	0	0	0	0	0	0	0	96	0	0	0	0	0	0	0	0	26	0	0	0	0	0	0	0	0	0	0	0	0	0	0	0	0	0	0	0	0
jockey-1_dgri base	0	0	0	0	0	0	124	0	0	0	0	0	0	0	0	0	0	0	0	76	0	0	0	0	0	0	0	0	0	0	0	0	0	0	0	0	0	0	0	0	0	0	0	0	0	0	0	0	0
r1-1b_dk base	63	0	0	0	0	0	0	0	0	0	0	0	0	0	0	0	0	0	0	0	0	0	0	0	0	0	0	0	0	0	0	0	0	0	0	134	0	0	0	0	0	0	0	0	0	0	0	0	0
gypsy-3_dwil base	0	0	0	0	0	0	197	0	0	0	0	0	0	0	0	0	0	0	0	0	0	0	0	0	0	0	0	0	0	0	0	0	0	0	0	0	0	0	0	0	0	0	0	0	0	0	0	0	0
hat-1_dan base	0	0	0	0	0	0	0	0	0	0	0	0	0	0	0	0	0	0	0	0	0	0	0	0	0	0	0	0	0	0	0	0	0	0	0	0	0	0	0	0	0	0	0	0	0	0	0	0	0
r1_dwi base	0	0	0	0	0	0	0	0	0	0	0	0	0	0	0	0	0	0	0	0	0	0	0	0	0	0	0	0	0	0	0	0	0	0	0	0	0	0	0	0	0	0	0	0	0	0	0	0	0
vege_dw base	0	0	0	0	0	0	41	0	0	0	0	0	0	0	0	0	0	0	0	0	0	0	0	0	0	0	0	0	0	0	0	0	0	0	0	0	0	0	0	0	0	0	0	0	0	0	0	0	0
gypsy-1_dg base	0	0	0	0	0	0	0	0	0	0	0	0	0	0	0	0	0	0	0	123	0	0	0	0	0	0	0	0	70	0	0	0	0	0	0	0	0	0	0	0	0	0	0	0	0	0	0	0	0
mariner-4_dan base	43	0	0	0	0	0	0	0	0	0	0	0	0	0	0	0	0	0	0	0	0	0	0	0	0	0	0	0	0	0	0	0	0	0	0	62	0	0	0	0	0	0	0	0	0	0	0	0	0
gypsy11_dpse base	0	0	0	0	0	0	72	0	65	0	0	0	0	0	0	0	0	0	0	0	0	0	0	0	0	0	0	0	50	0	0	0	0	0	0	0	0	0	0	0	0	0	0	0	0	0	0	0	0
mariner-7_del base	185	0	0	0	0	0	0	0	0	0	0	0	0	0	0	0	0	0	0	0	0	0	0	0	0	0	0	0	0	0	0	0	0	0	0	0	0	0	0	0	0	0	0	0	0	0	0	0	0
het-a_dv base	0	0	0	0	0	0	0	0	0	0	0	0	0	0	0	0	0	0	0	0	0	0	0	0	0	0	0	0	130	0	0	0	0	0	0	0	0	0	0	0	0	0	0	0	0	0	0	0	0
gypsy-10_dan base	108	0	0	0	0	0	0	0	0	0	0	0	0	0	0	0	0	0	0	0	0	0	0	0	0	0	0	0	0	0	0	0	0	0	0	0	0	0	0	0	0	0	0	0	0	0	0	0	0
hogri1 base	0	0	0	0	0	0	0	0	0	0	0	0	0	0	0	0	0	0	0	0	0	0	0	0	0	0	0	0	0	0	0	0	0	0	0	0	0	0	0	0	0	0	0	0	0	0	0	0	0
gypsy-21_dbp base	109	0	0	0	0	0	0	0	0	0	0	0	0	0	0	0	0	0	0	0	74	0	0	0	0	0	0	0	0	0	0	0	0	0	0	0	0	0	0	0	0	0	0	0	0	0	0	0	0
hat-2_drh base	0	0	0	73	0	0	0	0	0	0	0	0	0	0	0	0	0	0	0	0	0	0	0	0	0	0	0	0	0	0	0	0	0	0	0	0	0	0	0	0	0	0	0	0	0	0	0	0	0
rte-1c_dan base	63	56	0	0	0	0	63	0	0	0	0	0	0	0	0	0	0	0	0	0	0	0	0	0	0	0	0	0	0	0	0	0	0	0	0	0	0	0	0	0	0	0	0	0	0	0	0	0	0
bel-8_dmo base	0	0	0	0	0	0	179	0	0	0	0	0	0	0	0	0	0	0	0	0	0	0	0	0	0	0	0	0	0	0	0	0	0	0	0	0	0	0	0	0	0	0	0	0	0	0	0	0	0
copia-1_dgri base	0	0	0	0	0	0	89	0	0	0	0	0	0	0	0	0	0	0	0	90	0	0	0	0	0	0	0	0	0	0	0	0	0	0	0	0	0	0	0	0	0	0	0	0	0	0	0	0	0
gypsy-6_del base	0	0	0	0	0	0	113	0	0	0	0	0	0	0	0	0	0	0	0	0	0	0	0	0	0	0	0	0	65	0	0	0	0	0	0	0	0	0	0	0	0	0	0	0	0	0	0	0	0
gypsy7_dpse base	125	0	0	0	0	0	0	0	0	0	0	0	0	0	0	0	0	0	0	0	0	0	0	0	0	0	0	0	0	0	0	0	0	0	0	0	0	0	0	0	0	0	0	0	0	0	0	0	0
mariner-3_del base	0	0	0	0	0	0	174	0	0	0	0	0	0	0	0	0	0	0	0	0	0	0	0	0	0	0	0	0	0	0	0	0	0	0	0	0	0	0	0	0	0	0	0	0	0	0	0	0	0
jockey-6_del base	0	0	0	0	0	0	0	0	174	0	0	0	0	0	0	0	0	0	0	0	0	0	0	0	0	0	0	0	0	0	0	0	0	0	0	0	0	0	0	0	0	0	0	0	0	0	0	0	0
rtex-1_dt base	0	0	0	0	0	0	55	0	0	0	0	0	0	0	0	0	0	0	0	0	0	0	0	0	0	0	0	0	0	0	0	0	0	0	0	0	0	0	0	0	0	0	0	0	0	0	0	0	0
gypsy-11_drh base	0	0	0	0	0	0	0	0	0	0	0	0	0	0	0	0	0	0	0	170	0	0	0	0	0	0	0	0	0	0	0	0	0	0	0	0	0	0	0	0	0	0	0	0	0	0	0	0	0
gypsy-15_dbi base	0	0	0	0	0	0	0	0	0	0	0	0	0	0	0	0	0	0	0	0	0	0	0	0	0	0	0	0	42	0	0	0	0	0	0	0	0	0	0	0	0	0	0	0	0	0	0	0	0
polinton-1_dpe base	68	0	0	0	0	0	0	0	0	0	0	0	0	0	0	0	0	0	0	71	0	0	0	0	0	0	0	0	0	0	0	0	0	0	0	0	0	0	0	0	0	0	0	0	0	0	0	0	0
gypsy-24_dan base	50	0	0	0	0	0	119	0	0	0	0	0	0	0	0	0	0	0	0	0	0	0	0	0	0	0	0	0	0	0	0	0	0	0	0	0	0	0	0	0	0	0	0	0	0	0	0	0	0
transib1_dp base	0	0	0	0	0	0	169	0	0	0	0	0	0	0	0	0	0	0	0	0	0	0	0	0	0	0	0	0	0	0	0	0	0	0	0	0	0	0	0	0	0	0	0	0	0	0	0	0	0
r1b_dvi base	0	0	0	0	0	0	0	0	0	0	0	0	0	0	0	0	0	0	0	0	0	0	0	0	0	0	0	0	0	0	0	0	0	0	0	0	0	0	0	0	0	0	0	0	0	0	0	0	0
dna3-1_dta base	0	0	0	0	0	0	0	0	0	0	0	0	0	0	0	0	0	0	0	89	0	0	0	0	0	0	0	0	77	0	0	0	0	0	0	0	0	0	0	0	0	0	0	0	0	0	0	0	0
gypsy-35_del base	0	0	0	0	0	0	0	0	0	0	0	0	0	0	0	0	0	0	0	0	87	0	0	0	0	0	0	0	0	0	0	0	0	0	0	0	0	0	0	0	0	0	0	0	0	0	0	0	0
gypsy-49_dwil base	0	0	0	0	0	0	0	0	0	0	0	0	0	0	0	0	0	0	0	0	33	0	0	99	0	0	0	0	0	0	0	0	0	0	0	0	0	0	0	0	0	0	0	0	0	0	0	0	0
kiri-1_dta base	0	0	0	0	0	0	0	0	0	0	0	0	0	0	0	0	0	0	0	93	0	0	0	0	0	0	0	0	71	0	0	0	0	0	0	0	0	0	0	0	0	0	0	0	0	0	0	0	0
gypsy-4_dgri base	0	0	0	0	0	0	0	0	0	0	0	0	0	0	0	0	0	0	0	0	0	0	0	0	0	0	0	0	164	0	0	0	0	0	0	0	0	0	0	0	0	0	0	0	0	0	0	0	0
i-2_deu base	0	164	0	0	0	0	0	0	0	0	0	0	0	0	0	0	0	0	0	0	0	0	0	0	0	0	0	0	0	0	0	0	0	0	0	0	0	0	0	0	0	0	0	0	0	0	0	0	0
gypsy-17_dbi base	0	0	0	0	0	0	33	0	0	0	0	0	0	0	0	0	0	0	0	0	0	0	0	0	0	0	0	0	0	0	0	0	0	0	0	0	0	0	0	0	0	0	0	0	0	0	0	0	0
helitron-1_dk base	48	0	0	0	0	0	0	0	0	0	0	0	0	0	0	0	0	0	0	0	0	0	0	0	0	0	0	0	57	0	0	0	0	0	0	0	0	0	0	0	0	0	0	0	0	0	0	0	0
bel1_dya base	0	0	0	0	0	0	41	0	0	0	0	0	0	0	0	0	0	0	0	0	0	0	0	0	0	0	0	0	0	0	0	0	0	0	0	0	0	0	0	0	0	0	0	0	0	0	0	0	0
mariner-20_dk base	0	157	0	0	0	0	0	0	0	0	0	0	0	0	0	0	0	0	0	0	0	0	0	0	0	0	0	0	0	0	0	0	0	0	0	0	0	0	0	0	0	0	0	0	0	0	0	0	0
copia-2_dan base	0	0	0	0	0	152	0	0	0	0	0	0	0	0	0	0	0	0	0	0	0	0	0	0	0	0	0	0	0	0	0	0	0	0	0	0	0	0	0	0	0	0	0	0	0	0	0	0	0
r1-3_dan base	0	0	0	0	0	0	83	0	0	0	0	0	0	0	0	0	0	0	0	0	0	0	0	0	0	0	0	0	69	0	0	0	0	0	0	0	0	0	0	0	0	0	0	0	0	0	0	0	0
gypsy23_dpse base	0	0	0	0	0	0	0	0	0	0	0	0	0	0	0	0	0	0	0	48	0	0	0	0	0	0	0	0	0	0	0	0	0	0	0	0	0	0	0	0	0	0	0	0	0	0	0	0	0
jockey-10_dy base	0	0	0	0	0	0	0	0	0	0	0	0	0	0	0	0	0	0	0	0	0	0	0	0	0	0	0	0	0	0	0	0	0	0	0	0	0	0	0	0	0	0	0	0	0	0	0	0	0
gypsy-44_del base	0	0	0	0	0	0	37	0	0	0	0	0	0	0	0	0	0	0	0	40	0	0	0	0	0	0	0	0	72	0	0	0	0	0	0	0	0	0	0	0	0	0	0	0	0	0	0	0	0
gypsy-35_dan base	0	0	0	0	0	0	147	0	0	0	0	0	0	0	0	0	0	0	0	0	0	0	0	0	0	0	0	0	0	0	0	0	0	0	0	0	0	0	0	0	0	0	0	0	0	0	0	0	0
gypsy-4_del base	0	0	0	0	0	0	0	0	0	0	0	0	0	0	0	0	0	0	0	0	0	0	146	0	0	0	0	0	0	0	0	0	0	0	0	0	0	0	0	0	0	0	0	0	0	0	0	0	0
transib2_dp base	0	0	0	0	0	0	0	0	0	0	0	0	0	0	0	0	0	0	0	0	145	0	0	0	0	0	0	0	0	0	0	0	0	0	0	0	0	0	0	0	0	0	0	0	0	0	0	0	0
jockey-4_dya base	0	0	0	0	0	0	0	0	0	0	0	0	0	0	0	0	0	0	0	0	0	0	0	0	0	0	0	0	0	0	0	0	0	0	0	0	0	0	0	0	0	0	0	0	0	0	0	0	0
gypsy-27_dwil base	0	0	0	0	0	0	0	0	0	0	0	0	0	0	0	0	0	0	0	0	0	0	90	0	0	0	0	0	50	0	0	0	0	0	0	0	0	0	0	0	0	0	0	0	0	0	0	0	0
jockey-4_dk base	0	138	0	0	0	0	0	0	0	0	0	0	0	0	0	0	0	0	0	0	0	0	0	0	0	0	0	0	0	0	0	0	0	0	0	0	0	0	0	0	0	0	0	0	0	0	0	0	0
helitron-n2_dbp base	0	0	0	0	0	0	0	0	0	0	0	0	0	0	0	0	0	0	0	96	0	0	0	0	0	0	0	0	0	0	0	0	0	0	0	0	0	0	0	0	0	0	0	0	0	0	0	0	0
gypsy-14_dta base	0	0	0	0	137	0	0	0	0	0	0	0	0	0	0	0	0	0	0	0	0	0	0	0	0	0	0	0	0	0	0	0	0	0	0	0	0	0	0	0	0	0	0	0	0	0	0	0	0
helitron-2_df base	136	0	0	0	0	0	0	0	0	0	0	0	0	0	0	0	0	0	0	0	0	0	0	0	0	0	0	0	0	0	0	0	0	0	0	0	0	0	0	0	0	0	0	0	0	0	0	0	0
gypsy-44_dwil base	0	0	0	0	0	0	136	0	0	0	0	0	0	0	0	0	0	0	0	0	0	0	0	0	0	0	0	0	0	0	0	0	0	0	0	0	0	0	0	0	0	0	0	0	0	0	0	0	0
jockey-12_dan base	0	0	0	0	0	0	0	0	136	0	0	0	0	0	0	0	0	0	0	0	0	0	0	0	0	0	0	0	0	0	0	0	0	0	0	0	0	0	0	0	0	0	0	0	0	0	0	0	0
gypsy-9_dmoj base	0	0	0	0	0	0	0	0	0	0	0	0	0	0	0	0	0	0	0	0	0	0	0	0	0	0	0	0	0	0	0	0	0	0	0	80	0	0	0	0	0	0	0	0	0	0	0	0	0
howilli2 base	0	0	0	0	0	0	63	0	0	0	0	0	0	0	0	0	0	0	0	0	0	0	0	0	0	0	0	0	71	0	0	0	0	0	0	0	0	0	0	0	0	0	0	0	0	0	0	0	0
gypsy-26_dp base	40	0	0	0	0	0	0	0	0	0	0	0	0	0	0	0	0	0	0	46	0	0	0	0	0	0	0	0	46	0	0	0	0	0	0	0	0	0	0	0	0	0	0	0	0	0	0	0	0
gypsy-23_dbp base	0	0	0	0	0	0	56	0	0	0	0	0	0	0	0	0	0	0	0	0	0	0	0	0	0	0	0	0	0	0	0	0	0	0	0	0	0	0	0	0	0	0	0	0	0	0	0	0	0
gypsy-6_dwil base	0	0	0	0	0	0	0	0	0	0	0	0	0	0	0	0	0	0	0	65	0	0	0	0	0	0	0	0	0	0	0	0	0	0	0	65	0	0	0	0	0	0	0	0	0	0	0	0	0
mariner-16_drh base	0	0	0	0	0	0	0	0	0	0	0	0	0	0	0	0	0	0	0	0	0	0	0	0	0	0	0	0	129	0	0	0	0	0	0	0	0	0	0	0	0	0	0	0	0	0	0	0	0
mar_dw base	0	0	0	0	0	0	67	0	0	0	0	0	0	0	0	0	0	0	0	0	0	0	0	0	0	0	0	0	0	0	0	0	0	0	0	0	0	0	0	0	0	0	0	0	0	0	0	0	0
gypsy-30_dan base	0	0	0	0	0	0	0	0	0	0	0	0	0	0	0	0	0	0	0	0	41	0	0	0	0	0	0	0	85	0	0	0	0	0	0	0	0	0	0	0	0	0	0	0	0	0	0	0	0
cr1-1_drh base	0	0	0	0	0	0	0	0	0	0	0	0	0	0	0	0	0	0	0	0	0	0	0	0	0	0	0	0	121	0	0	0	0	0	0	0	0	0	0	0	0	0	0	0	0	0	0	0	0
gypsy6_dpse base	0	0	0	0	0	0	0	0	0	0	0	0	0	0	0	0	0	0	0	0	81	0	0	0	0	0	0	0	40	0	0	0	0	0	0	0	0	0	0	0	0	0	0	0	0	0	0	0	0
gypsy-29_del base	0	0	0	0	0	0	0	0	0	0	0	0	0	0	0	0	0	0	0	0	0	0	0	0	0	0	0	0	0	0	0	0	0	0	0	0	0	0	0	0	0	0	0	0	0	0	0	0	0
gypsy-2_dvir base	0	0	0	0	0	0	52	0	0	0	0	0	0	0	0	0	0	0	0	66	0	0	0	0	0	0	0	0	0	0	0	0	0	0	0	0	0	0	0	0	0	0	0	0	0	0	0	0	0
piggybac-1_deu base	0	118	0	0	0	0	0	0	0	0	0	0	0	0	0	0	0	0	0	0	0	0	0	0	0	0	0	0	0	0	0	0	0	0	0	0	0	0	0	0	0	0	0	0	0	0	0	0	0
cr1-1_dwil base	51	0	0	0	0	0	0	0	0	0	0	0	0	0	0	0	0	0	0	65	0	0	0	0	0	0	0	0	0	0	0	0	0	0	0	0	0	0	0	0	0	0	0	0	0	0	0	0	0
gypsy-5_dgri base	0	0	0	0	0	0	0	0	0	0	0	0	0	0	0	0	0	0	0	0	0	0	0	0	0	0	0	0	0	0	0	0	0	0	0	0	0	0	0	0	0	0	0	0	0	0	0	0	0
dna2-1_dan base	0	0	0	0	0	0	115	0	0	0	0	0	0	0	0	0	0	0	0	0	0	0	0	0	0	0	0	0	0	0	0	0	0	0	0	0	0	0	0	0	0	0	0	0	0	0	0	0	0
homo11 base	0	0	0	0	0	0	0	0	0	0	0	0	0	0	0	0	0	0	0	57	0	0	0	0	0	0	0	0	58	0	0	0	0	0	0	0	0	0	0	0	0	0	0	0	0	0	0	0	0
bel-2_dfi base	0	0	0	0	0	0	0	0	0	0	0	0	0	0	0	0	0	0	0	0	0	0	0	0	0	0	0	0	41	0	0	0	0	0	0	0	0	0	0	0	0	0	0	0	0	0	0	0	0
gypsy-9_deu base	0	0	0	0	0	0	0	0	0	0	0	0	0	0	0	0	0	0	0	0	0	0	0	0	0	0	0	0	0	0	0	0	0	0	0	0	0	0	0	0	0	0	0	0	0	0	0	0	0
jockey-2_dk base	0	0	0	0	0	0	0	0	0	0	0	0	0	0	0	0	0	0	0	0	0	0	0	0	0	0	0	0	0	0	0	0	0	0	0	55	0	0	0	0	0	0	0	0	0	0	0	0	0
gypsy-59_dwil base	0	0	0	0	0	0	112	0	0	0	0	0	0	0	0	0	0	0	0	0	0	0	0	0	0	0	0	0	0	0	0	0	0	0	0	0	0	0	0	0	0	0	0	0	0	0	0	0	0
r1-3_dper base	0	63	0	0	0	0	48	0	0	0	0	0	0	0	0	0	0	0	0	0	0	0	0	0	0	0	0	0	0	0	0	0	0	0	0	0	0	0	0	0	0	0	0	0	0	0	0	0	0
hat-5_dk base	0	0	0	0	0	0	0	0	0	0	0	0	0	0	0	0	0	0	0	0	0	0	0	0	0	0	0	0	0	0	0	0	0	0	0	111	0	0	0	0	0	0	0	0	0	0	0	0	0
worf_dmi base	59	0	0	0	0	0	51	0	0	0	0	0	0	0	0	0	0	0	0	0	0	0	0	0	0	0	0	0	0	0	0	0	0	0	0	0	0	0	0	0	0	0	0	0	0	0	0	0	0
transib-2_dbi base	0	0	0	0	0	0	0	0	0	0	0	0	0	0	0	0	0	0	0	0	0	0	0	0	0	0	0	0	0	0	0	0	0	0	0	0	0	0	0	0	0	0	0	0	0	0	0	0	0
gypsy-55_del base	0	0	0	0	0	0	0	0	0	0	0	0	0	0	0	0	0	0	0	54	0	0	0	0	0	0	0	0	0	0	0	0	0	0	0	0	0	0	0	0	0	0	0	0	0	0	0	0	0
polinton-2_deu base	0	0	0	0	0	30	0	0	0	0	0	0	0	0	0	0	0	0	0	0	0	0	0	0	0	0	0	0	78	0	0	0	0	0	0	0	0	0	0	0	0	0	0	0	0	0	0	0	0
r1-5_dper base	0	0	0	0	0	0	0	0	0	0	0	0	0	0	0	0	0	0	0	108	0	0	0	0	0	0	0	0	0	0	0	0	0	0	0	0	0	0	0	0	0	0	0	0	0	0	0	0	0
parisa_dpe base	0	0	0	0	0	0	0	0	0	0	0	0	0	0	0	0	0	0	0	107	0	0	0	0	0	0	0	0	0	0	0	0	0	0	0	0	0	0	0	0	0	0	0	0	0	0	0	0	0
r1-6_dwi base	61	0	0	0	0	0	0	0	0	0	0	0	0	0	0	0	0	0	0	0	0	0	0	0	0	0	0	0	0	0	0	0	0	0	0	0	0	0	0	0	0	0	0	0	0	0	0	0	0
copia-2_deu base	0	0	0	0	0	106	0	0	0	0	0	0	0	0	0	0	0	0	0	0	0	0	0	0	0	0	0	0	0	0	0	0	0	0	0	0	0	0	0	0	0	0	0	0	0	0	0	0	0
hat-4_drh base	0	0	0	0	0	0	106	0	0	0	0	0	0	0	0	0	0	0	0	0	0	0	0	0	0	0	0	0	0	0	0	0	0	0	0	0	0	0	0	0	0	0	0	0	0	0	0	0	0
howilli3 base	0	0	0	0	0	0	0	0	0	0	0	0	0	0	0	0	0	0	0	0	0	0	0	0	0	0	0	0	0	0	0	0	0	0	0	0	0	0	0	0	0	0	0	0	0	0	0	0	0
gypsy-62_dwil base	0	0	0	0	0	0	0	0	0	0	0	0	0	0	0	0	0	0	0	105	0	0	0	0	0	0	0	0	0	0	0	0	0	0	0	0	0	0	0	0	0	0	0	0	0	0	0	0	0
transib-1_df base	0	0	0	0	0	0	0	0	0	0	0	0	0	0	0	0	0	0	0	61	0	0	0	0	0	0	0	0	44	0	0	0	0	0	0	0	0	0	0	0	0	0	0	0	0	0	0	0	0
r1-1_del base	0	0	0	0	0	0	0	0	0	0	0	0	0	0	0	0	0	0	0	45	0	0	0	0	0	0	0	0	59	0	0	0	0	0	0	0	0	0	0	0	0	0	0	0	0	0	0	0	0
gypsy-5_dper base	104	0	0	0	0	0	0	0	0	0	0	0	0	0	0	0	0	0	0	0	0	0	0	0	0	0	0	0	0	0	0	0	0	0	0	0	0	0	0	0	0	0	0	0	0	0	0	0	0
jockey-n1_dvi base	0	0	0	0	0	0	0	0	0	0	0	0	0	0	0	0	0	0	0	0	0	0	0	0	0	0	0	0	69	0	0	0	0	0	0	0	0	0	0	0	0	0	0	0	0	0	0	0	0
gypsy-25_dp base	0	0	0	0	0	0	0	0	0	0	0	0	0	0	0	0	0	0	0	33	0	0	0	0	0	0	0	0	69	0	0	0	0	0	0	0	0	0	0	0	0	0	0	0	0	0	0	0	0
bel-2_dta base	0	0	0	0	0	0	0	0	0	0	0	0	0	0	0	0	0	0	0	102	0	0	0	0	0	0	0	0	0	0	0	0	0	0	0	0	0	0	0	0	0	0	0	0	0	0	0	0	0
cr1-5_drh base	0	0	0	0	0	0	0	0	0	0	0	0	0	0	0	0	0	0	0	0	0	0	0	0	0	0	0	0	0	0	0	0	0	0	0	0	0	0	0	0	0	0	0	0	0	0	0	0	0
gypsy3_dpse base	0	0	0	0	0	0	0	0	0	0	0	0	0	0	0	0	0	0	0	98	0	0	0	0	0	0	0	0	0	0	0	0	0	0	0	0	0	0	0	0	0	0	0	0	0	0	0	0	0
gypsy-18_dwil base	0	0	0	0	0	0	0	0	0	0	0	0	0	0	0	0	0	0	0	0	0	0	0	0	0	0	0	0	0	0	0	0	0	0	0	0	0	0	0	0	0	0	0	0	0	0	0	0	0
gypsy-17_dbp base	0	0	0	0	0	0	98	0	0	0	0	0	0	0	0	0	0	0	0	0	0	0	0	0	0	0	0	0	0	0	0	0	0	0	0	0	0	0	0	0	0	0	0	0	0	0	0	0	0
cr1-1_deu base	0	0	0	0	0	0	0	0	0	0	0	0	0	0	0	0	0	0	0	0	0	0	0	0	0	0	0	0	97	0	0	0	0	0	0	0	0	0	0	0	0	0	0	0	0	0	0	0	0
r1-2_del base	0	0	0	0	0	0	0	0	0	0	0	0	0	0	0	0	0	0	0	0	0	0	0	0	0	0	0	0	0	0	0	0	0	0	0	97	0	0	0	0	0	0	0	0	0	0	0	0	0
polinton-1_dk base	0	0	0	0	0	0	0	0	0	0	0	0	0	0	0	0	0	0	0	38	0	0	0	0	0	0	0	0	0	0	0	0	0	0	0	0	0	0	0	0	0	0	0	0	0	0	0	0	0
bel-15_dp base	0	0	0	0	0	0	35	0	0	0	0	0	0	0	0	0	0	0	0	0	0	0	0	0	0	0	0	0	0	0	0	0	0	0	0	0	0	0	0	0	0	0	0	0	0	0	0	0	0
i-5_dk base	0	0	0	0	0	0	0	0	0	0	0	0	0	0	0	0	0	0	0	0	0	0	0	0	0	0	0	0	0	0	0	0	0	0	0	0	0	0	0	0	0	0	0	0	0	0	0	0	0
bel-1_dgri base	53	0	0	0	0	0	43	0	0	0	0	0	0	0	0	0	0	0	0	0	0	0	0	0	0	0	0	0	0	0	0	0	0	0	0	0	0	0	0	0	0	0	0	0	0	0	0	0	0
gypsy-37_dan base	0	0	52	0	0	0	0	0	0	0	0	0	0	0	0	0	0	0	0	43	0	0	0	0	0	0	0	0	0	0	0	0	0	0	0	0	0	0	0	0	0	0	0	0	0	0	0	0	0
homo8 base	0	94	0	0	0	0	0	0	0	0	0	0	0	0	0	0	0	0	0	0	0	0	0	0	0	0	0	0	0	0	0	0	0	0	0	0	0	0	0	0	0	0	0	0	0	0	0	0	0
piggybac-1_dan base	93	0	0	0	0	0	0	0	0	0	0	0	0	0	0	0	0	0	0	0	0	0	0	0	0	0	0	0	0	0	0	0	0	0	0	0	0	0	0	0	0	0	0	0	0	0	0	0	0
gypsy-26_dan base	0	0	0	0	0	0	92	0	0	0	0	0	0	0	0	0	0	0	0	0	0	0	0	0	0	0	0	0	0	0	0	0	0	0	0	0	0	0	0	0	0	0	0	0	0	0	0	0	0
hat-6_dbp base	92	0	0	0	0	0	0	0	0	0	0	0	0	0	0	0	0	0	0	0	0	0	0	0	0	0	0	0	0	0	0	0	0	0	0	0	0	0	0	0	0	0	0	0	0	0	0	0	0
jockey-2_dvi base	44	0	0	0	0	0	0	0	0	0	0	0	0	0	0	0	0	0	0	48	0	0	0	0	0	0	0	0	0	0	0	0	0	0	0	0	0	0	0	0	0	0	0	0	0	0	0	0	0
gypsy-30_dya base	0	0	0	0	0	0	91	0	0	0	0	0	0	0	0	0	0	0	0	0	0	0	0	0	0	0	0	0	0	0	0	0	0	0	0	0	0	0	0	0	0	0	0	0	0	0	0	0	0
bel-6_dwil base	0	0	0	0	0	0	0	0	0	0	0	0	0	0	0	0	0	0	0	0	0	0	0	0	0	0	0	0	91	0	0	0	0	0	0	0	0	0	0	0	0	0	0	0	0	0	0	0	0
enspm-1_df base	0	60	0	0	31	0	0	0	0	0	0	0	0	0	0	0	0	0	0	0	0	0	0	0	0	0	0	0	0	0	0	0	0	0	0	0	0	0	0	0	0	0	0	0	0	0	0	0	0
gypsy-27_dan base	0	0	0	0	0	0	0	0	0	0	0	0	0	0	0	0	0	0	0	0	0	0	0	0	0	0	0	0	90	0	0	0	0	0	0	0	0	0	0	0	0	0	0	0	0	0	0	0	0
bel-5_del base	0	0	0	0	0	0	0	0	0	89	0	0	0	0	0	0	0	0	0	0	0	0	0	0	0	0	0	0	0	0	0	0	0	0	0	0	0	0	0	0	0	0	0	0	0	0	0	0	0
r1-2_dya base	0	0	0	0	0	0	0	0	0	0	0	0	0	0	0	0	0	0	0	0	0	0	0	0	0	0	0	0	0	0	0	0	0	0	0	86	0	0	0	0	0	0	0	0	0	0	0	0	0
jockey-7_dan base	0	30	0	0	0	0	0	0	0	0	0	0	0	0	0	0	0	0	0	0	0	0	0	0	0	0	0	0	0	0	0	0	0	0	0	55	0	0	0	0	0	0	0	0	0	0	0	0	0
zator-1_df base	0	0	0	0	0	0	0	0	0	0	0	0	0	0	0	0	0	0	0	0	0	0	0	0	0	0	0	0	84	0	0	0	0	0	0	0	0	0	0	0	0	0	0	0	0	0	0	0	0
bel-10_dan base	84	0	0	0	0	0	0	0	0	0	0	0	0	0	0	0	0	0	0	0	0	0	0	0	0	0	0	0	0	0	0	0	0	0	0	0	0	0	0	0	0	0	0	0	0	0	0	0	0
galileo_dw base	0	0	0	0	0	0	0	0	0	0	0	0	0	0	0	0	0	0	0	0	0	0	0	0	0	0	0	0	84	0	0	0	0	0	0	0	0	0	0	0	0	0	0	0	0	0	0	0	0
bel-11_dwil base	0	0	0	0	0	0	83	0	0	0	0	0	0	0	0	0	0	0	0	0	0	0	0	0	0	0	0	0	0	0	0	0	0	0	0	0	0	0	0	0	0	0	0	0	0	0	0	0	0
bel-3_dbi base	0	0	0	0	0	0	0	0	0	0	0	0	0	0	0	0	0	0	0	0	0	0	0	0	0	0	0	0	45	0	0	0	0	0	0	0	0	0	0	0	0	0	0	0	0	0	0	0	0
piggybac-1_dw base	83	0	0	0	0	0	0	0	0	0	0	0	0	0	0	0	0	0	0	0	0	0	0	0	0	0	0	0	0	0	0	0	0	0	0	0	0	0	0	0	0	0	0	0	0	0	0	0	0
r1-1_deu base	0	0	0	0	0	0	83	0	0	0	0	0	0	0	0	0	0	0	0	0	0	0	0	0	0	0	0	0	0	0	0	0	0	0	0	0	0	0	0	0	0	0	0	0	0	0	0	0	0
mariner-11_df base	0	0	0	0	0	0	82	0	0	0	0	0	0	0	0	0	0	0	0	0	0	0	0	0	0	0	0	0	0	0	0	0	0	0	0	0	0	0	0	0	0	0	0	0	0	0	0	0	0
bel-3_dbp base	0	0	0	0	0	0	0	0	0	0	0	0	0	0	0	0	0	0	0	0	0	0	0	0	0	0	0	0	80	0	0	0	0	0	0	0	0	0	0	0	0	0	0	0	0	0	0	0	0
transib-2_dan base	80	0	0	0	0	0	0	0	0	0	0	0	0	0	0	0	0	0	0	0	0	0	0	0	0	0	0	0	0	0	0	0	0	0	0	0	0	0	0	0	0	0	0	0	0	0	0	0	0
mariner-4_dk base	0	0	0	0	0	0	0	0	0	0	0	0	0	0	0	0	0	0	0	0	0	0	0	0	0	0	0	0	79	0	0	0	0	0	0	0	0	0	0	0	0	0	0	0	0	0	0	0	0
jockey-2_dbp base	0	0	0	0	0	0	0	0	0	0	0	0	0	0	0	0	0	0	0	0	0	0	0	0	0	0	0	0	0	0	0	0	0	0	0	0	0	0	0	0	0	0	0	0	0	0	0	0	0
jockey-4_df base	0	78	0	0	0	0	0	0	0	0	0	0	0	0	0	0	0	0	0	0	0	0	0	0	0	0	0	0	0	0	0	0	0	0	0	0	0	0	0	0	0	0	0	0	0	0	0	0	0
jockey-9_dan base	0	0	0	0	0	0	77	0	0	0	0	0	0	0	0	0	0	0	0	0	0	0	0	0	0	0	0	0	0	0	0	0	0	0	0	0	0	0	0	0	0	0	0	0	0	0	0	0	0
bel-17_dan base	77	0	0	0	0	0	0	0	0	0	0	0	0	0	0	0	0	0	0	0	0	0	0	0	0	0	0	0	0	0	0	0	0	0	0	0	0	0	0	0	0	0	0	0	0	0	0	0	0
gypsy5_dmoj base	0	0	0	0	0	0	0	0	0	0	0	0	0	0	0	0	0	0	0	77	0	0	0	0	0	0	0	0	0	0	0	0	0	0	0	0	0	0	0	0	0	0	0	0	0	0	0	0	0
hoyak1 base	0	0	0	0	0	0	0	0	0	0	0	0	0	0	0	0	0	0	0	76	0	0	0	0	0	0	0	0	0	0	0	0	0	0	0	0	0	0	0	0	0	0	0	0	0	0	0	0	0
harbinger-1_drh base	0	0	0	0	0	0	0	0	0	0	0	0	0	0	0	0	0	0	0	0	0	0	0	0	0	0	0	0	75	0	0	0	0	0	0	0	0	0	0	0	0	0	0	0	0	0	0	0	0
i-4_dbi base	0	0	0	0	0	0	0	0	0	0	0	0	0	0	0	0	0	0	0	0	0	0	0	0	0	0	0	0	74	0	0	0	0	0	0	0	0	0	0	0	0	0	0	0	0	0	0	0	0
r2_dya base	73	0	0	0	0	0	0	0	0	0	0	0	0	0	0	0	0	0	0	0	0	0	0	0	0	0	0	0	0	0	0	0	0	0	0	0	0	0	0	0	0	0	0	0	0	0	0	0	0
mariner-8_dbp base	0	0	0	0	0	0	0	0	0	0	0	0	0	0	0	0	0	0	0	73	0	0	0	0	0	0	0	0	0	0	0	0	0	0	0	0	0	0	0	0	0	0	0	0	0	0	0	0	0
bel-22_dan base	0	0	0	0	0	0	0	0	0	0	0	0	0	0	0	0	0	0	0	0	0	0	0	0	0	0	0	0	0	0	0	0	0	0	0	0	0	0	0	0	0	0	0	0	0	0	0	0	0
r1-2_dbp base	0	0	0	0	0	0	0	0	73	0	0	0	0	0	0	0	0	0	0	0	0	0	0	0	0	0	0	0	0	0	0	0	0	0	0	0	0	0	0	0	0	0	0	0	0	0	0	0	0
i-1_dya base	0	0	0	0	0	0	0	0	0	0	0	0	0	0	0	0	0	0	0	0	0	0	0	0	0	0	0	0	0	0	0	0	0	0	0	0	0	0	0	0	0	0	0	0	0	0	0	0	0
ftz_dm base	0	0	0	0	0	0	0	0	0	0	0	0	0	0	0	0	0	0	0	0	0	0	0	0	0	0	0	0	72	0	0	0	0	0	0	0	0	0	0	0	0	0	0	0	0	0	0	0	0
bel-21_dta base	0	0	0	0	0	0	0	0	0	0	0	0	0	0	0	0	0	0	0	0	0	0	0	0	0	0	0	0	0	0	0	0	0	0	0	0	0	0	0	0	0	0	0	0	0	0	0	0	0
gypsy-11_dvir base	71	0	0	0	0	0	0	0	0	0	0	0	0	0	0	0	0	0	0	0	0	0	0	0	0	0	0	0	0	0	0	0	0	0	0	0	0	0	0	0	0	0	0	0	0	0	0	0	0
copia-4_dmoj base	0	0	0	0	0	0	0	0	0	0	0	0	0	0	0	0	0	0	0	0	0	0	0	0	0	0	0	0	70	0	0	0	0	0	0	0	0	0	0	0	0	0	0	0	0	0	0	0	0
mariner-2_dvi base	0	0	0	0	0	0	0	0	0	0	0	0	0	0	0	0	0	0	0	69	0	0	0	0	0	0	0	0	0	0	0	0	0	0	0	0	0	0	0	0	0	0	0	0	0	0	0	0	0
cr1-5_del base	0	0	0	0	0	0	0	0	0	0	0	0	0	0	0	0	0	0	0	0	0	0	0	0	0	0	0	0	0	0	0	0	0	0	0	0	0	0	0	0	0	0	0	0	0	0	0	0	0
copia1_dmoj base	0	0	0	0	0	0	0	0	0	0	0	0	0	0	0	0	0	0	0	0	0	0	0	0	0	0	0	0	0	0	0	0	0	0	0	0	0	0	0	0	0	0	0	0	0	0	0	0	0
helitron-2_dbp base	0	69	0	0	0	0	0	0	0	0	0	0	0	0	0	0	0	0	0	0	0	0	0	0	0	0	0	0	0	0	0	0	0	0	0	0	0	0	0	0	0	0	0	0	0	0	0	0	0
cr1-1_dbi base	0	69	0	0	0	0	0	0	0	0	0	0	0	0	0	0	0	0	0	0	0	0	0	0	0	0	0	0	0	0	0	0	0	0	0	0	0	0	0	0	0	0	0	0	0	0	0	0	0
hat-8_dbp base	0	0	0	69	0	0	0	0	0	0	0	0	0	0	0	0	0	0	0	0	0	0	0	0	0	0	0	0	0	0	0	0	0	0	0	0	0	0	0	0	0	0	0	0	0	0	0	0	0
bel-5_dbp base	0	0	0	0	0	0	0	0	0	0	0	0	0	0	0	0	0	0	0	68	0	0	0	0	0	0	0	0	0	0	0	0	0	0	0	0	0	0	0	0	0	0	0	0	0	0	0	0	0
bel-7_dan base	0	0	0	0	0	0	68	0	0	0	0	0	0	0	0	0	0	0	0	0	0	0	0	0	0	0	0	0	0	0	0	0	0	0	0	0	0	0	0	0	0	0	0	0	0	0	0	0	0
gypsy-36_dwil base	67	0	0	0	0	0	0	0	0	0	0	0	0	0	0	0	0	0	0	0	0	0	0	0	0	0	0	0	0	0	0	0	0	0	0	0	0	0	0	0	0	0	0	0	0	0	0	0	0
tom base	0	0	0	0	0	0	0	0	0	0	0	0	0	0	0	0	0	0	0	0	0	0	67	0	0	0	0	0	0	0	0	0	0	0	0	0	0	0	0	0	0	0	0	0	0	0	0	0	0
transib-6_dbi base	0	0	0	0	0	0	67	0	0	0	0	0	0	0	0	0	0	0	0	0	0	0	0	0	0	0	0	0	0	0	0	0	0	0	0	0	0	0	0	0	0	0	0	0	0	0	0	0	0
bel-10_del base	0	0	0	0	67	0	0	0	0	0	0	0	0	0	0	0	0	0	0	0	0	0	0	0	0	0	0	0	0	0	0	0	0	0	0	0	0	0	0	0	0	0	0	0	0	0	0	0	0
gypsy7_dmoj base	0	0	0	0	0	0	0	0	0	0	0	0	0	0	0	0	0	0	0	0	0	0	0	0	0	0	0	0	67	0	0	0	0	0	0	0	0	0	0	0	0	0	0	0	0	0	0	0	0
gypsy-27_dbp base	0	0	0	0	0	0	0	0	0	0	0	0	0	0	0	0	0	0	0	66	0	0	0	0	0	0	0	0	0	0	0	0	0	0	0	0	0	0	0	0	0	0	0	0	0	0	0	0	0
gypsy-8_drh base	0	0	0	0	0	0	66	0	0	0	0	0	0	0	0	0	0	0	0	0	0	0	0	0	0	0	0	0	0	0	0	0	0	0	0	0	0	0	0	0	0	0	0	0	0	0	0	0	0
gypsy-33_dwil base	0	0	0	0	0	0	66	0	0	0	0	0	0	0	0	0	0	0	0	0	0	0	0	0	0	0	0	0	0	0	0	0	0	0	0	0	0	0	0	0	0	0	0	0	0	0	0	0	0
loa-1_del base	0	0	0	0	0	0	65	0	0	0	0	0	0	0	0	0	0	0	0	0	0	0	0	0	0	0	0	0	0	0	0	0	0	0	0	0	0	0	0	0	0	0	0	0	0	0	0	0	0
bel-18_dwil base	65	0	0	0	0	0	0	0	0	0	0	0	0	0	0	0	0	0	0	0	0	0	0	0	0	0	0	0	0	0	0	0	0	0	0	0	0	0	0	0	0	0	0	0	0	0	0	0	0
polinton-2_dbi base	0	0	0	0	0	0	0	0	0	0	0	0	0	0	0	0	0	0	0	0	0	0	0	0	0	0	0	0	65	0	0	0	0	0	0	0	0	0	0	0	0	0	0	0	0	0	0	0	0
gypsy-5_dan base	0	0	0	0	0	0	0	0	0	0	0	0	0	0	0	0	0	0	0	0	0	0	0	0	0	0	0	0	64	0	0	0	0	0	0	0	0	0	0	0	0	0	0	0	0	0	0	0	0
bel-14_dan base	0	0	0	0	0	0	64	0	0	0	0	0	0	0	0	0	0	0	0	0	0	0	0	0	0	0	0	0	0	0	0	0	0	0	0	0	0	0	0	0	0	0	0	0	0	0	0	0	0
jockey-10_df base	0	0	0	0	0	0	64	0	0	0	0	0	0	0	0	0	0	0	0	0	0	0	0	0	0	0	0	0	0	0	0	0	0	0	0	0	0	0	0	0	0	0	0	0	0	0	0	0	0
cr1-2_dper base	0	0	0	0	0	0	64	0	0	0	0	0	0	0	0	0	0	0	0	0	0	0	0	0	0	0	0	0	0	0	0	0	0	0	0	0	0	0	0	0	0	0	0	0	0	0	0	0	0
transib1_dwil base	0	0	0	0	0	0	0	0	0	0	0	0	0	0	0	0	0	0	0	0	0	0	0	0	0	0	0	0	64	0	0	0	0	0	0	0	0	0	0	0	0	0	0	0	0	0	0	0	0
gypsy-12_deu base	0	0	0	0	0	0	63	0	0	0	0	0	0	0	0	0	0	0	0	0	0	0	0	0	0	0	0	0	0	0	0	0	0	0	0	0	0	0	0	0	0	0	0	0	0	0	0	0	0
gypsy-4_dki base	0	0	0	0	0	0	0	0	0	0	0	0	0	0	0	0	0	0	0	0	0	0	0	0	0	0	0	0	0	0	0	0	0	0	0	0	0	0	0	0	0	0	0	0	0	0	0	0	0
gypsy-32_dwil base	63	0	0	0	0	0	0	0	0	0	0	0	0	0	0	0	0	0	0	0	0	0	0	0	0	0	0	0	0	0	0	0	0	0	0	0	0	0	0	0	0	0	0	0	0	0	0	0	0
uhu_dan base	0	0	0	0	0	0	0	0	0	0	0	0	0	0	0	0	0	0	0	0	0	0	0	0	0	0	0	0	62	0	0	0	0	0	0	0	0	0	0	0	0	0	0	0	0	0	0	0	0
i-2_dvi base	0	0	0	0	0	62	0	0	0	0	0	0	0	0	0	0	0	0	0	0	0	0	0	0	0	0	0	0	0	0	0	0	0	0	0	0	0	0	0	0	0	0	0	0	0	0	0	0	0
bel-11_dan base	0	0	0	0	0	0	0	0	0	0	0	0	0	0	0	0	0	0	0	62	0	0	0	0	0	0	0	0	0	0	0	0	0	0	0	0	0	0	0	0	0	0	0	0	0	0	0	0	0
cr1-2_deu base	0	0	62	0	0	0	0	0	0	0	0	0	0	0	0	0	0	0	0	0	0	0	0	0	0	0	0	0	0	0	0	0	0	0	0	0	0	0	0	0	0	0	0	0	0	0	0	0	0
gypsy-32_dya base	0	0	0	0	0	0	62	0	0	0	0	0	0	0	0	0	0	0	0	0	0	0	0	0	0	0	0	0	0	0	0	0	0	0	0	0	0	0	0	0	0	0	0	0	0	0	0	0	0
gypsy-1_dwil base	0	0	0	0	0	0	0	0	0	0	0	0	0	0	0	0	0	0	0	0	0	0	0	0	0	0	0	0	62	0	0	0	0	0	0	0	0	0	0	0	0	0	0	0	0	0	0	0	0
penelope2_dw base	0	0	0	0	0	0	61	0	0	0	0	0	0	0	0	0	0	0	0	0	0	0	0	0	0	0	0	0	0	0	0	0	0	0	0	0	0	0	0	0	0	0	0	0	0	0	0	0	0
harbinger-1n1_drh base	0	0	0	0	0	0	0	0	0	0	0	0	0	0	0	0	0	0	0	0	0	0	0	0	0	0	0	0	0	0	0	0	0	0	0	61	0	0	0	0	0	0	0	0	0	0	0	0	0
jockey-9_dbp base	0	0	0	0	0	0	0	0	0	0	0	0	0	0	0	0	0	0	0	60	0	0	0	0	0	0	0	0	0	0	0	0	0	0	0	0	0	0	0	0	0	0	0	0	0	0	0	0	0
jockey-11_dbp base	0	0	0	0	0	0	59	0	0	0	0	0	0	0	0	0	0	0	0	0	0	0	0	0	0	0	0	0	0	0	0	0	0	0	0	0	0	0	0	0	0	0	0	0	0	0	0	0	0
jockey-3_dan base	0	0	0	0	0	0	0	0	0	0	0	0	0	0	0	0	0	0	0	0	0	0	0	0	0	0	0	0	59	0	0	0	0	0	0	0	0	0	0	0	0	0	0	0	0	0	0	0	0
jockey-7_deu base	0	0	0	0	0	0	0	0	0	0	0	0	0	0	0	0	0	0	0	59	0	0	0	0	0	0	0	0	0	0	0	0	0	0	0	0	0	0	0	0	0	0	0	0	0	0	0	0	0
loa-1_dt base	59	0	0	0	0	0	0	0	0	0	0	0	0	0	0	0	0	0	0	0	0	0	0	0	0	0	0	0	0	0	0	0	0	0	0	0	0	0	0	0	0	0	0	0	0	0	0	0	0
hat-1_dt base	0	0	0	0	0	0	0	0	0	0	0	0	0	0	0	0	0	0	0	0	0	0	0	0	0	0	0	0	0	0	0	0	0	0	0	0	0	0	0	0	0	0	0	0	0	0	0	0	0
piggybac-3_dan base	0	0	0	0	0	0	0	0	0	0	0	0	0	0	0	0	0	0	0	58	0	0	0	0	0	0	0	0	0	0	0	0	0	0	0	0	0	0	0	0	0	0	0	0	0	0	0	0	0
piggybac-2_df base	58	0	0	0	0	0	0	0	0	0	0	0	0	0	0	0	0	0	0	0	0	0	0	0	0	0	0	0	0	0	0	0	0	0	0	0	0	0	0	0	0	0	0	0	0	0	0	0	0
cr1-8_dta base	58	0	0	0	0	0	0	0	0	0	0	0	0	0	0	0	0	0	0	0	0	0	0	0	0	0	0	0	0	0	0	0	0	0	0	0	0	0	0	0	0	0	0	0	0	0	0	0	0
i-2_dya base	0	0	0	0	0	0	0	0	0	0	0	0	0	0	0	0	0	0	0	57	0	0	0	0	0	0	0	0	0	0	0	0	0	0	0	0	0	0	0	0	0	0	0	0	0	0	0	0	0
copia-4_dwil base	0	0	0	0	0	0	0	0	0	0	0	0	0	0	0	0	0	0	0	0	0	0	0	0	0	0	0	0	57	0	0	0	0	0	0	0	0	0	0	0	0	0	0	0	0	0	0	0	0
cr1-4_dan base	0	0	0	0	0	0	0	0	0	0	0	0	0	0	0	0	0	0	0	0	0	0	0	0	0	0	0	0	0	0	0	0	0	0	0	0	0	0	0	0	0	0	0	0	0	0	0	0	0
i-1_dwi base	0	0	0	0	0	0	0	0	0	0	0	0	0	0	0	0	0	0	0	0	0	0	0	0	0	0	0	0	0	0	0	0	0	0	0	0	0	0	0	0	0	0	0	0	0	0	0	0	0
bel-16_dan base	0	0	0	0	0	0	0	0	0	0	0	0	0	0	0	0	0	0	0	0	0	0	0	0	0	0	0	0	56	0	0	0	0	0	0	0	0	0	0	0	0	0	0	0	0	0	0	0	0
gypsy-54_dwil base	0	0	0	0	0	0	0	0	0	0	0	0	0	0	0	0	0	0	0	0	0	0	0	0	0	0	0	0	0	0	0	0	0	0	0	0	0	0	0	0	0	0	0	0	0	0	0	0	0
transib-4_drh base	0	0	0	0	0	0	0	0	0	0	0	0	0	0	0	0	0	0	0	0	0	0	55	0	0	0	0	0	0	0	0	0	0	0	0	0	0	0	0	0	0	0	0	0	0	0	0	0	0
bel-1_dfi base	0	0	0	0	0	0	0	0	0	0	0	0	0	0	0	0	0	0	0	55	0	0	0	0	0	0	0	0	0	0	0	0	0	0	0	0	0	0	0	0	0	0	0	0	0	0	0	0	0
cr1-2_del base	0	0	0	0	0	0	0	0	0	0	0	0	0	0	0	0	0	0	0	0	0	0	0	0	0	0	0	0	0	0	0	0	0	0	0	0	0	0	0	0	0	0	0	0	0	0	0	0	0
mariner-10_dan base	0	0	0	0	0	0	0	0	0	0	0	0	0	0	0	0	0	0	0	0	0	0	0	0	0	0	0	0	0	0	0	0	0	0	0	0	0	0	0	0	0	0	0	0	0	0	0	0	0
hat-3_drh base	0	0	0	0	0	0	54	0	0	0	0	0	0	0	0	0	0	0	0	0	0	0	0	0	0	0	0	0	0	0	0	0	0	0	0	0	0	0	0	0	0	0	0	0	0	0	0	0	0
i-6_dbp base	0	0	0	0	0	0	54	0	0	0	0	0	0	0	0	0	0	0	0	0	0	0	0	0	0	0	0	0	0	0	0	0	0	0	0	0	0	0	0	0	0	0	0	0	0	0	0	0	0
jockey-4_deu base	0	0	0	0	0	0	0	0	54	0	0	0	0	0	0	0	0	0	0	0	0	0	0	0	0	0	0	0	0	0	0	0	0	0	0	0	0	0	0	0	0	0	0	0	0	0	0	0	0
jockey-1_dvi base	54	0	0	0	0	0	0	0	0	0	0	0	0	0	0	0	0	0	0	0	0	0	0	0	0	0	0	0	0	0	0	0	0	0	0	0	0	0	0	0	0	0	0	0	0	0	0	0	0
loa-2_dgri base	0	0	0	0	0	0	54	0	0	0	0	0	0	0	0	0	0	0	0	0	0	0	0	0	0	0	0	0	0	0	0	0	0	0	0	0	0	0	0	0	0	0	0	0	0	0	0	0	0
gypsy9_dpse base	54	0	0	0	0	0	0	0	0	0	0	0	0	0	0	0	0	0	0	0	0	0	0	0	0	0	0	0	0	0	0	0	0	0	0	0	0	0	0	0	0	0	0	0	0	0	0	0	0
hovi2 base	0	0	0	0	0	0	0	0	0	0	0	0	0	0	0	0	0	0	0	0	0	0	0	0	0	0	0	0	53	0	0	0	0	0	0	0	0	0	0	0	0	0	0	0	0	0	0	0	0
cr1-1_dper base	0	0	0	0	0	0	0	0	0	0	0	0	0	0	0	0	0	0	0	0	0	0	0	0	0	0	0	0	53	0	0	0	0	0	0	0	0	0	0	0	0	0	0	0	0	0	0	0	0
jockey-3_dk base	0	0	0	0	0	0	53	0	0	0	0	0	0	0	0	0	0	0	0	0	0	0	0	0	0	0	0	0	0	0	0	0	0	0	0	0	0	0	0	0	0	0	0	0	0	0	0	0	0
kiri-3_dk base	0	0	0	0	0	0	0	0	0	0	0	0	0	0	0	0	0	0	0	0	0	0	0	0	0	0	0	0	53	0	0	0	0	0	0	0	0	0	0	0	0	0	0	0	0	0	0	0	0
loa-1_dper base	0	0	0	0	0	0	53	0	0	0	0	0	0	0	0	0	0	0	0	0	0	0	0	0	0	0	0	0	0	0	0	0	0	0	0	0	0	0	0	0	0	0	0	0	0	0	0	0	0
r1-2_dwi base	0	0	0	0	0	0	0	0	0	0	0	0	0	0	0	0	0	0	0	53	0	0	0	0	0	0	0	0	0	0	0	0	0	0	0	0	0	0	0	0	0	0	0	0	0	0	0	0	0
ala_dm base	0	0	0	0	0	0	0	0	0	0	0	0	0	0	0	0	0	0	0	52	0	0	0	0	0	0	0	0	0	0	0	0	0	0	0	0	0	0	0	0	0	0	0	0	0	0	0	0	0
r1-1_drh base	0	0	0	0	0	0	0	0	0	0	0	0	0	0	0	0	0	0	0	0	0	0	0	0	0	0	0	0	52	0	0	0	0	0	0	0	0	0	0	0	0	0	0	0	0	0	0	0	0
polinton-2_dk base	0	0	0	0	0	0	0	0	0	0	0	0	0	0	0	0	0	0	0	0	0	0	0	0	0	0	0	0	0	0	0	0	0	0	0	0	0	0	0	0	0	0	0	0	0	0	0	0	0
gypsy-15_dan base	0	0	0	0	0	52	0	0	0	0	0	0	0	0	0	0	0	0	0	0	0	0	0	0	0	0	0	0	0	0	0	0	0	0	0	0	0	0	0	0	0	0	0	0	0	0	0	0	0
bel-15_dwil base	0	0	0	0	0	0	0	0	0	0	0	0	0	0	0	0	0	0	0	0	0	0	0	0	0	0	0	0	0	0	0	0	0	0	0	0	0	0	0	0	0	0	0	0	0	0	0	0	0
cr1-5_dt base	0	0	0	0	0	0	0	0	0	0	0	0	0	0	0	0	0	0	0	0	0	0	0	0	0	0	0	0	0	0	0	0	0	0	0	0	0	0	0	0	0	0	0	0	0	0	0	0	0
cr1-2_dk base	0	0	0	0	0	0	0	0	0	0	0	0	0	0	0	0	0	0	0	0	0	0	51	0	0	0	0	0	0	0	0	0	0	0	0	0	0	0	0	0	0	0	0	0	0	0	0	0	0
bel-7_dmoj base	0	0	0	0	0	0	0	0	0	0	0	0	0	0	0	0	0	0	0	0	0	0	0	0	0	0	0	0	0	0	0	0	0	0	0	0	0	0	0	0	0	0	0	0	0	0	0	0	0
cr1-1_dk base	0	0	0	0	0	0	0	0	0	0	0	0	0	0	0	0	0	0	0	0	0	0	0	0	0	0	0	0	50	0	0	0	0	0	0	0	0	0	0	0	0	0	0	0	0	0	0	0	0
cr1-2_dt base	0	0	0	0	0	0	50	0	0	0	0	0	0	0	0	0	0	0	0	0	0	0	0	0	0	0	0	0	0	0	0	0	0	0	0	0	0	0	0	0	0	0	0	0	0	0	0	0	0
gypsy-22_dbp base	0	0	0	0	0	0	0	0	0	0	0	0	0	0	0	0	0	0	0	50	0	0	0	0	0	0	0	0	0	0	0	0	0	0	0	0	0	0	0	0	0	0	0	0	0	0	0	0	0
mariner-1_dbp base	0	0	0	0	0	0	0	0	0	0	0	0	0	0	0	0	0	0	0	0	0	0	0	0	0	0	0	0	0	0	0	0	0	0	0	0	0	0	0	0	0	0	0	0	0	0	0	0	0
tld2 base	0	0	0	0	0	0	0	0	0	0	0	0	0	0	0	0	0	0	0	0	50	0	0	0	0	0	0	0	0	0	0	0	0	0	0	0	0	0	0	0	0	0	0	0	0	0	0	0	0
jockey-13_dbp base	0	0	0	0	0	0	0	0	0	0	0	0	0	0	0	0	0	0	0	0	0	0	0	0	0	0	0	0	50	0	0	0	0	0	0	0	0	0	0	0	0	0	0	0	0	0	0	0	0
cr1-3_del base	50	0	0	0	0	0	0	0	0	0	0	0	0	0	0	0	0	0	0	0	0	0	0	0	0	0	0	0	0	0	0	0	0	0	0	0	0	0	0	0	0	0	0	0	0	0	0	0	0
homo2 base	0	0	0	0	0	0	50	0	0	0	0	0	0	0	0	0	0	0	0	0	0	0	0	0	0	0	0	0	0	0	0	0	0	0	0	0	0	0	0	0	0	0	0	0	0	0	0	0	0
r2-1_dwi base	0	0	0	0	0	0	0	0	0	0	0	0	0	0	0	0	0	0	0	0	0	0	0	0	0	0	0	0	49	0	0	0	0	0	0	0	0	0	0	0	0	0	0	0	0	0	0	0	0
bel-7_dwil base	0	0	0	0	0	0	0	0	0	0	0	0	0	0	0	0	0	0	0	49	0	0	0	0	0	0	0	0	0	0	0	0	0	0	0	0	0	0	0	0	0	0	0	0	0	0	0	0	0
helitron-1_dpe base	0	0	0	0	0	0	0	0	0	0	0	0	0	0	0	0	0	0	0	0	0	0	0	0	0	0	0	0	0	0	0	0	0	0	0	0	0	0	0	0	0	0	0	0	0	0	0	0	0
r1b_dan base	0	0	0	0	0	0	0	0	0	0	0	0	0	0	0	0	0	0	0	0	0	0	0	0	0	0	0	0	49	0	0	0	0	0	0	0	0	0	0	0	0	0	0	0	0	0	0	0	0
homo5 base	0	0	0	0	0	0	0	0	0	0	0	0	0	0	0	0	0	0	0	0	0	0	0	0	0	0	0	0	0	0	0	0	0	0	0	0	0	0	0	0	0	0	0	0	0	0	0	0	0
gypsy-7_dbp base	0	0	0	0	0	0	0	0	0	0	0	0	0	0	0	0	0	0	0	48	0	0	0	0	0	0	0	0	0	0	0	0	0	0	0	0	0	0	0	0	0	0	0	0	0	0	0	0	0
r1-16_dwi base	0	0	0	0	0	0	0	0	0	0	0	0	0	0	0	0	0	0	0	0	0	0	0	0	0	0	0	0	0	0	0	0	0	0	0	0	0	0	0	0	0	0	0	0	0	0	0	0	0
lsu-rrna_hsa base	0	0	0	0	0	0	0	0	0	0	0	0	0	0	0	0	0	0	0	0	0	0	0	0	0	0	0	0	0	0	0	0	0	0	0	0	0	0	0	0	0	0	47	0	0	0	0	0	0
bel-8_dpe base	0	0	0	0	0	0	0	0	0	0	0	0	0	0	0	0	0	0	0	0	0	0	0	0	0	0	0	0	47	0	0	0	0	0	0	0	0	0	0	0	0	0	0	0	0	0	0	0	0
r1-5_dwi base	0	0	0	0	0	0	0	0	0	0	0	0	0	0	0	0	0	0	0	47	0	0	0	0	0	0	0	0	0	0	0	0	0	0	0	0	0	0	0	0	0	0	0	0	0	0	0	0	0
gypsy-1_del base	0	0	0	0	0	0	0	0	0	0	0	0	0	0	0	0	0	0	0	47	0	0	0	0	0	0	0	0	0	0	0	0	0	0	0	0	0	0	0	0	0	0	0	0	0	0	0	0	0
bel-12_dta base	0	0	0	0	0	0	0	0	0	0	0	0	0	0	0	0	0	0	0	0	0	0	0	0	0	0	0	0	47	0	0	0	0	0	0	0	0	0	0	0	0	0	0	0	0	0	0	0	0
outcast-1_dt base	0	0	0	0	0	0	0	0	0	0	0	0	0	0	0	0	0	0	0	46	0	0	0	0	0	0	0	0	0	0	0	0	0	0	0	0	0	0	0	0	0	0	0	0	0	0	0	0	0
r1-1_dper base	0	0	0	0	0	0	0	0	0	0	0	0	0	0	0	0	0	0	0	0	0	0	0	0	0	0	0	0	46	0	0	0	0	0	0	0	0	0	0	0	0	0	0	0	0	0	0	0	0
r1-3_dbp base	0	45	0	0	0	0	0	0	0	0	0	0	0	0	0	0	0	0	0	0	0	0	0	0	0	0	0	0	0	0	0	0	0	0	0	0	0	0	0	0	0	0	0	0	0	0	0	0	0
bel-1_dere base	0	0	0	0	0	0	45	0	0	0	0	0	0	0	0	0	0	0	0	0	0	0	0	0	0	0	0	0	0	0	0	0	0	0	0	0	0	0	0	0	0	0	0	0	0	0	0	0	0
rte-1bn1_dan base	0	0	0	0	0	0	0	0	0	0	0	0	0	0	0	0	0	0	0	45	0	0	0	0	0	0	0	0	0	0	0	0	0	0	0	0	0	0	0	0	0	0	0	0	0	0	0	0	0
gypsy-3_del base	0	0	0	0	0	0	45	0	0	0	0	0	0	0	0	0	0	0	0	0	0	0	0	0	0	0	0	0	0	0	0	0	0	0	0	0	0	0	0	0	0	0	0	0	0	0	0	0	0
loa-1_dps base	0	0	0	0	0	0	0	0	0	0	0	0	0	0	0	0	0	0	0	0	0	0	0	0	0	0	0	0	0	0	0	0	0	0	0	0	0	0	0	0	0	0	0	0	0	0	0	0	0
mariner-13_dbp base	0	0	0	0	0	0	0	0	0	0	0	0	0	0	0	0	0	0	0	0	0	0	0	0	0	0	0	0	44	0	0	0	0	0	0	0	0	0	0	0	0	0	0	0	0	0	0	0	0
gypsy-4_dwil base	0	0	0	0	0	0	0	0	0	0	0	0	0	0	0	0	0	0	0	44	0	0	0	0	0	0	0	0	0	0	0	0	0	0	0	0	0	0	0	0	0	0	0	0	0	0	0	0	0
gypsy-23_dan base	0	0	0	0	0	0	44	0	0	0	0	0	0	0	0	0	0	0	0	0	0	0	0	0	0	0	0	0	0	0	0	0	0	0	0	0	0	0	0	0	0	0	0	0	0	0	0	0	0
jockey-11b_dbp base	0	0	0	0	0	0	44	0	0	0	0	0	0	0	0	0	0	0	0	0	0	0	0	0	0	0	0	0	0	0	0	0	0	0	0	0	0	0	0	0	0	0	0	0	0	0	0	0	0
hoana2 base	0	0	0	0	0	0	0	0	0	0	0	0	0	0	0	0	0	0	0	43	0	0	0	0	0	0	0	0	0	0	0	0	0	0	0	0	0	0	0	0	0	0	0	0	0	0	0	0	0
bel-7_dta base	0	0	0	0	0	0	43	0	0	0	0	0	0	0	0	0	0	0	0	0	0	0	0	0	0	0	0	0	0	0	0	0	0	0	0	0	0	0	0	0	0	0	0	0	0	0	0	0	0
bel-16_dta base	0	0	0	0	0	0	0	0	0	0	0	0	0	0	0	0	0	0	0	43	0	0	0	0	0	0	0	0	0	0	0	0	0	0	0	0	0	0	0	0	0	0	0	0	0	0	0	0	0
mariner-6_dbp base	0	0	0	0	0	0	0	0	0	0	0	0	0	0	0	0	0	0	0	43	0	0	0	0	0	0	0	0	0	0	0	0	0	0	0	0	0	0	0	0	0	0	0	0	0	0	0	0	0
gypsy-20_dta base	0	0	0	0	0	0	0	0	0	0	0	0	0	0	0	0	0	0	0	0	0	0	0	0	0	0	0	0	0	0	0	0	0	0	0	0	0	0	0	0	0	0	0	0	0	0	0	0	0
harbinger-n1_dpe base	0	0	0	0	0	0	0	0	0	0	0	0	0	0	0	0	0	0	0	0	0	0	0	0	0	0	0	0	41	0	0	0	0	0	0	0	0	0	0	0	0	0	0	0	0	0	0	0	0
jockey-4_dper base	0	0	0	0	0	0	0	0	0	0	0	0	0	0	0	0	0	0	0	0	0	0	0	0	0	0	0	0	40	0	0	0	0	0	0	0	0	0	0	0	0	0	0	0	0	0	0	0	0
gypsy-7_dta base	0	0	0	0	0	0	40	0	0	0	0	0	0	0	0	0	0	0	0	0	0	0	0	0	0	0	0	0	0	0	0	0	0	0	0	0	0	0	0	0	0	0	0	0	0	0	0	0	0
lsu-rrna_cel base	0	0	0	0	0	0	0	0	0	0	0	0	0	0	0	0	0	0	0	0	0	0	0	0	0	0	0	0	0	0	0	0	0	0	0	0	0	0	0	0	0	0	0	0	0	0	0	0	0
i-2_dan base	0	0	0	0	0	0	0	0	0	0	0	0	0	0	0	0	0	0	0	39	0	0	0	0	0	0	0	0	0	0	0	0	0	0	0	0	0	0	0	0	0	0	0	0	0	0	0	0	0
mariner-3_drh base	0	0	0	0	0	0	39	0	0	0	0	0	0	0	0	0	0	0	0	0	0	0	0	0	0	0	0	0	0	0	0	0	0	0	0	0	0	0	0	0	0	0	0	0	0	0	0	0	0
bel-7_dper base	0	0	0	0	0	0	39	0	0	0	0	0	0	0	0	0	0	0	0	0	0	0	0	0	0	0	0	0	0	0	0	0	0	0	0	0	0	0	0	0	0	0	0	0	0	0	0	0	0
loa-2_del base	0	0	0	0	0	0	0	0	0	0	0	0	0	0	0	0	0	0	0	0	0	0	0	0	0	0	0	0	39	0	0	0	0	0	0	0	0	0	0	0	0	0	0	0	0	0	0	0	0
kiri-1_del base	0	0	0	0	0	0	0	0	0	0	0	0	0	0	0	0	0	0	0	0	0	0	0	0	0	0	0	0	38	0	0	0	0	0	0	0	0	0	0	0	0	0	0	0	0	0	0	0	0
gypsy-45_del base	0	0	0	0	0	0	0	0	0	0	0	0	0	0	0	0	0	0	0	0	0	0	0	0	0	0	0	0	0	0	0	0	0	0	0	0	0	0	0	0	0	0	0	0	0	0	0	0	0
transib-3_dbi base	0	0	0	0	0	0	0	0	0	0	0	0	0	0	0	0	0	0	0	0	0	0	38	0	0	0	0	0	0	0	0	0	0	0	0	0	0	0	0	0	0	0	0	0	0	0	0	0	0
gypsy-56_dwil base	38	0	0	0	0	0	0	0	0	0	0	0	0	0	0	0	0	0	0	0	0	0	0	0	0	0	0	0	0	0	0	0	0	0	0	0	0	0	0	0	0	0	0	0	0	0	0	0	0
cr1-3_dbp base	0	0	0	0	0	0	0	0	0	0	0	0	0	38	0	0	0	0	0	0	0	0	0	0	0	0	0	0	0	0	0	0	0	0	0	0	0	0	0	0	0	0	0	0	0	0	0	0	0
jockey-11_dan base	0	0	0	0	0	0	0	0	0	0	0	0	0	0	0	0	0	0	0	0	0	0	38	0	0	0	0	0	0	0	0	0	0	0	0	0	0	0	0	0	0	0	0	0	0	0	0	0	0
transib-4_dan base	0	0	0	0	0	0	0	0	0	0	0	0	0	0	0	0	0	0	0	0	0	0	0	0	0	0	0	0	37	0	0	0	0	0	0	0	0	0	0	0	0	0	0	0	0	0	0	0	0
bel-4_dbp base	37	0	0	0	0	0	0	0	0	0	0	0	0	0	0	0	0	0	0	0	0	0	0	0	0	0	0	0	0	0	0	0	0	0	0	0	0	0	0	0	0	0	0	0	0	0	0	0	0
r1-9_dwi base	0	0	0	0	0	0	0	0	0	0	0	0	0	0	0	0	0	0	0	37	0	0	0	0	0	0	0	0	0	0	0	0	0	0	0	0	0	0	0	0	0	0	0	0	0	0	0	0	0
bel-1_dta base	0	0	0	0	0	0	0	0	0	0	0	0	0	0	0	0	0	0	0	0	0	0	0	0	0	0	0	0	37	0	0	0	0	0	0	0	0	0	0	0	0	0	0	0	0	0	0	0	0
gypsy-14_dbp base	0	0	0	0	0	0	37	0	0	0	0	0	0	0	0	0	0	0	0	0	0	0	0	0	0	0	0	0	0	0	0	0	0	0	0	0	0	0	0	0	0	0	0	0	0	0	0	0	0
jockey-1_del base	0	0	0	0	0	0	0	0	0	0	0	0	0	0	0	0	0	0	0	36	0	0	0	0	0	0	0	0	0	0	0	0	0	0	0	0	0	0	0	0	0	0	0	0	0	0	0	0	0
kiri-1_dk base	0	0	0	0	0	0	0	0	0	0	0	0	0	0	0	0	0	0	0	36	0	0	0	0	0	0	0	0	0	0	0	0	0	0	0	0	0	0	0	0	0	0	0	0	0	0	0	0	0
bel-1_deu base	0	0	0	0	0	0	0	0	0	0	0	0	0	0	0	0	0	0	0	0	0	0	0	0	0	0	0	0	0	0	0	0	0	0	0	0	0	0	0	0	0	0	0	0	0	0	0	0	0
[truncated: 103 more columns]
