# Supplementary material
Source: publisher figshare collection journal article supplement (https://gsajournals.figshare.com/articles/dataset/_/7294937)
Supplement: Supplementary file 2 [file 1]

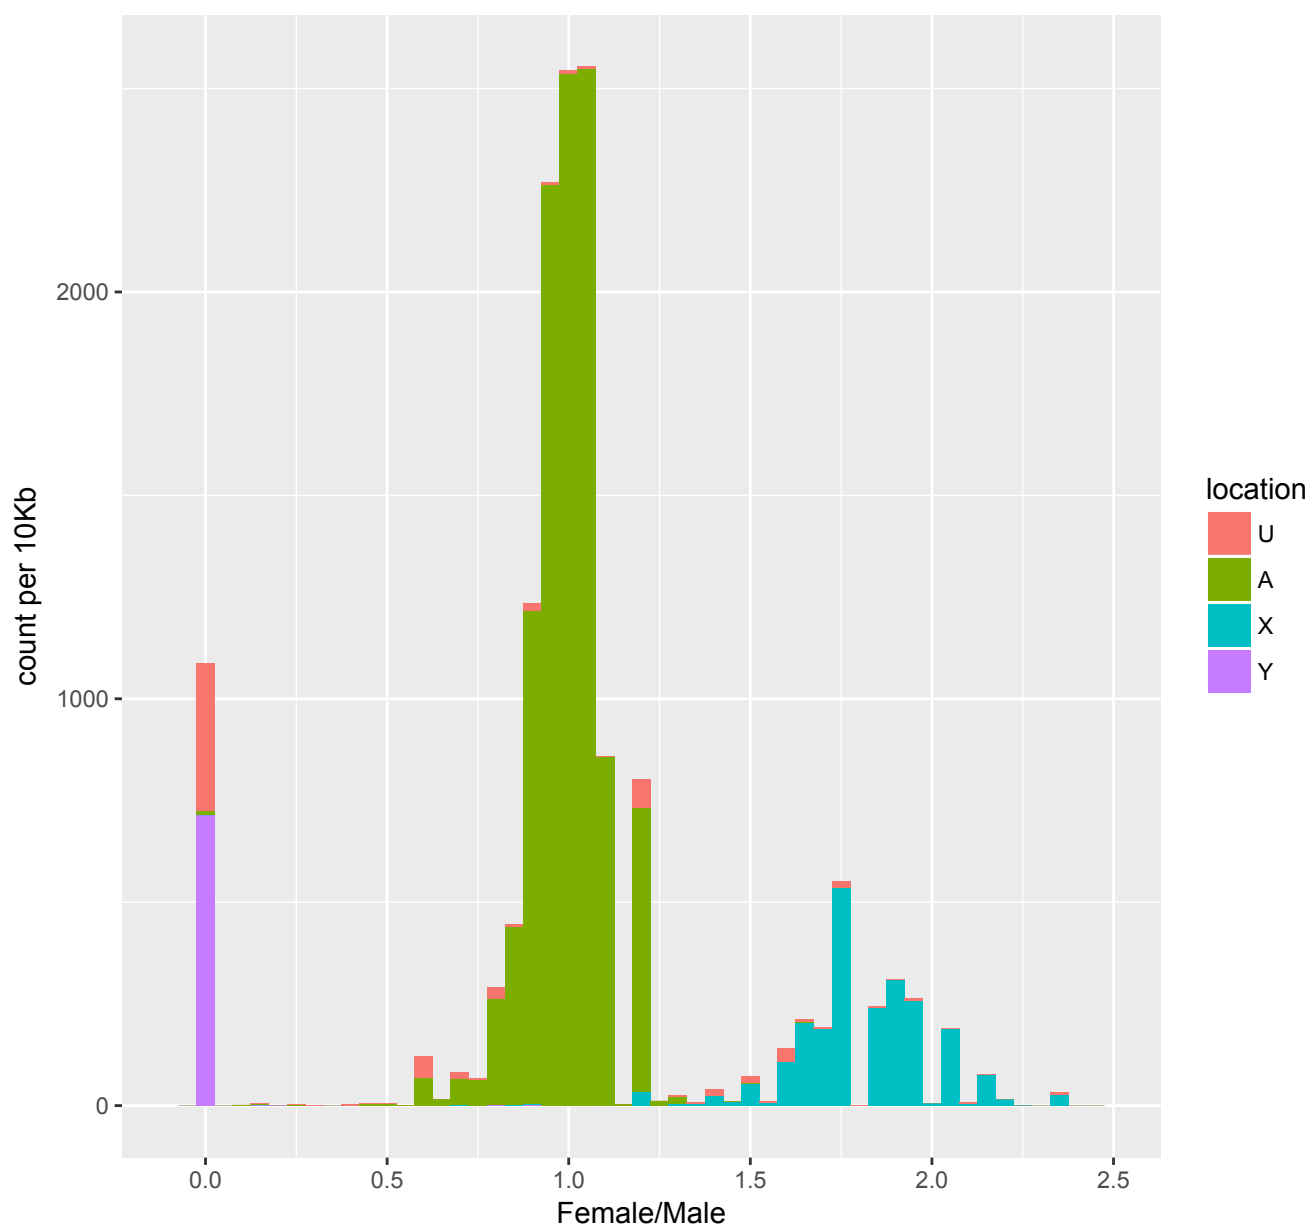

**Figure S4: The median female-to-male coverage ratio of Illumina reads across different chromosomes based on the R6 annotation.** We mapped the male and female Illumina reads to our new genome using bwa, and called median of female-to-male coverage ratio using samtools and custom scripts for each 10-kb region. The median female-to-male mapping ratio was normalized by total mapped reads. Contig location was determined by known gene content. Regions from contigs with Y-linked genes have a median female-to-male coverage ratio of 0.
