# Supplementary material
Source: publisher figshare collection journal article supplement (https://gsajournals.figshare.com/articles/dataset/_/7294937)
Supplement: Supplementary file 4 [file 1]

**A**

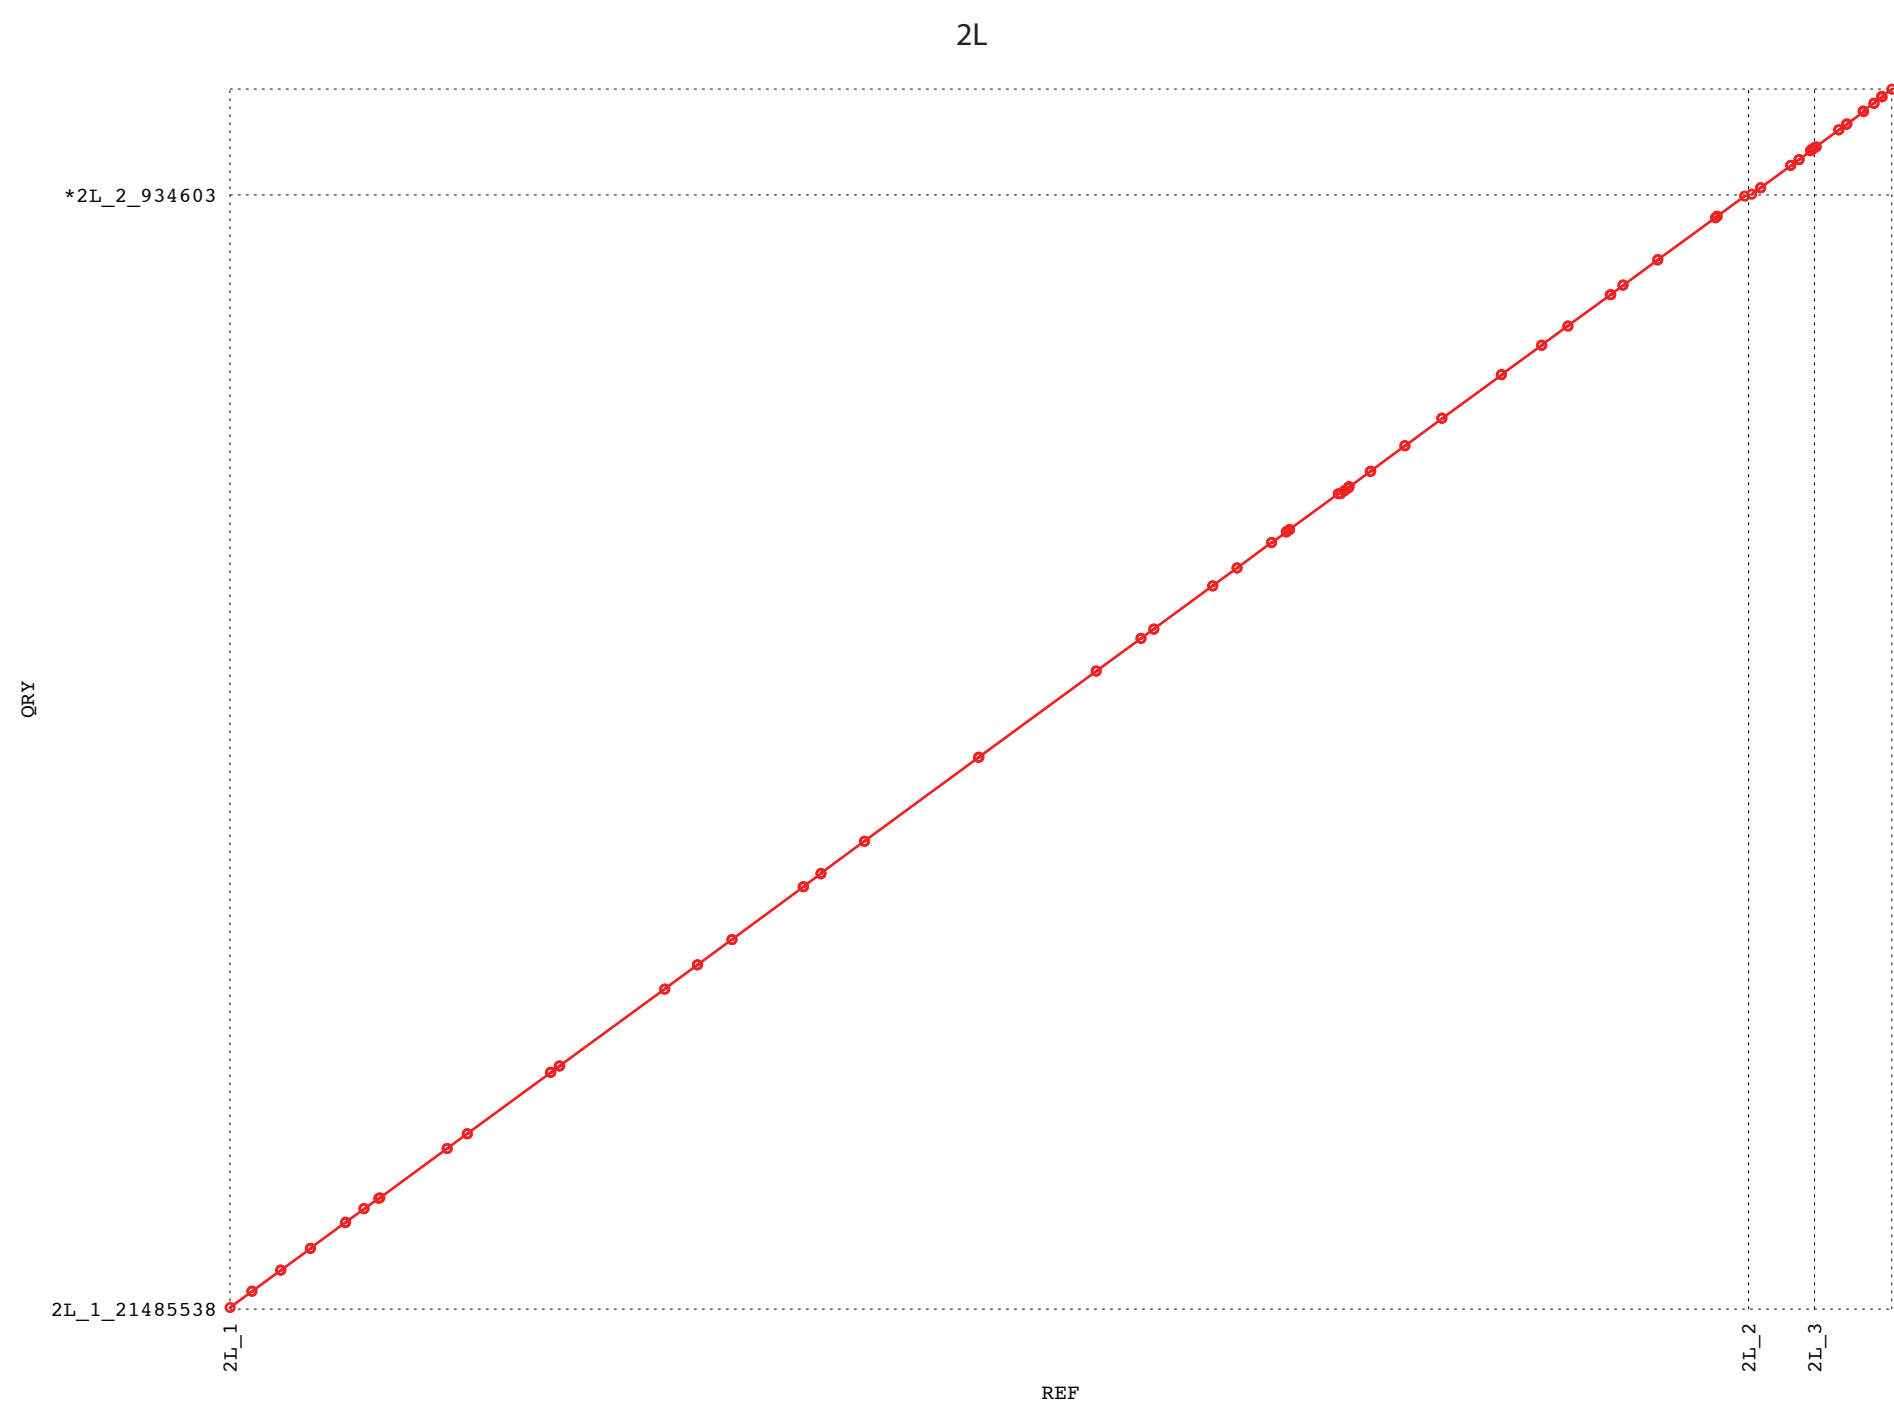**B**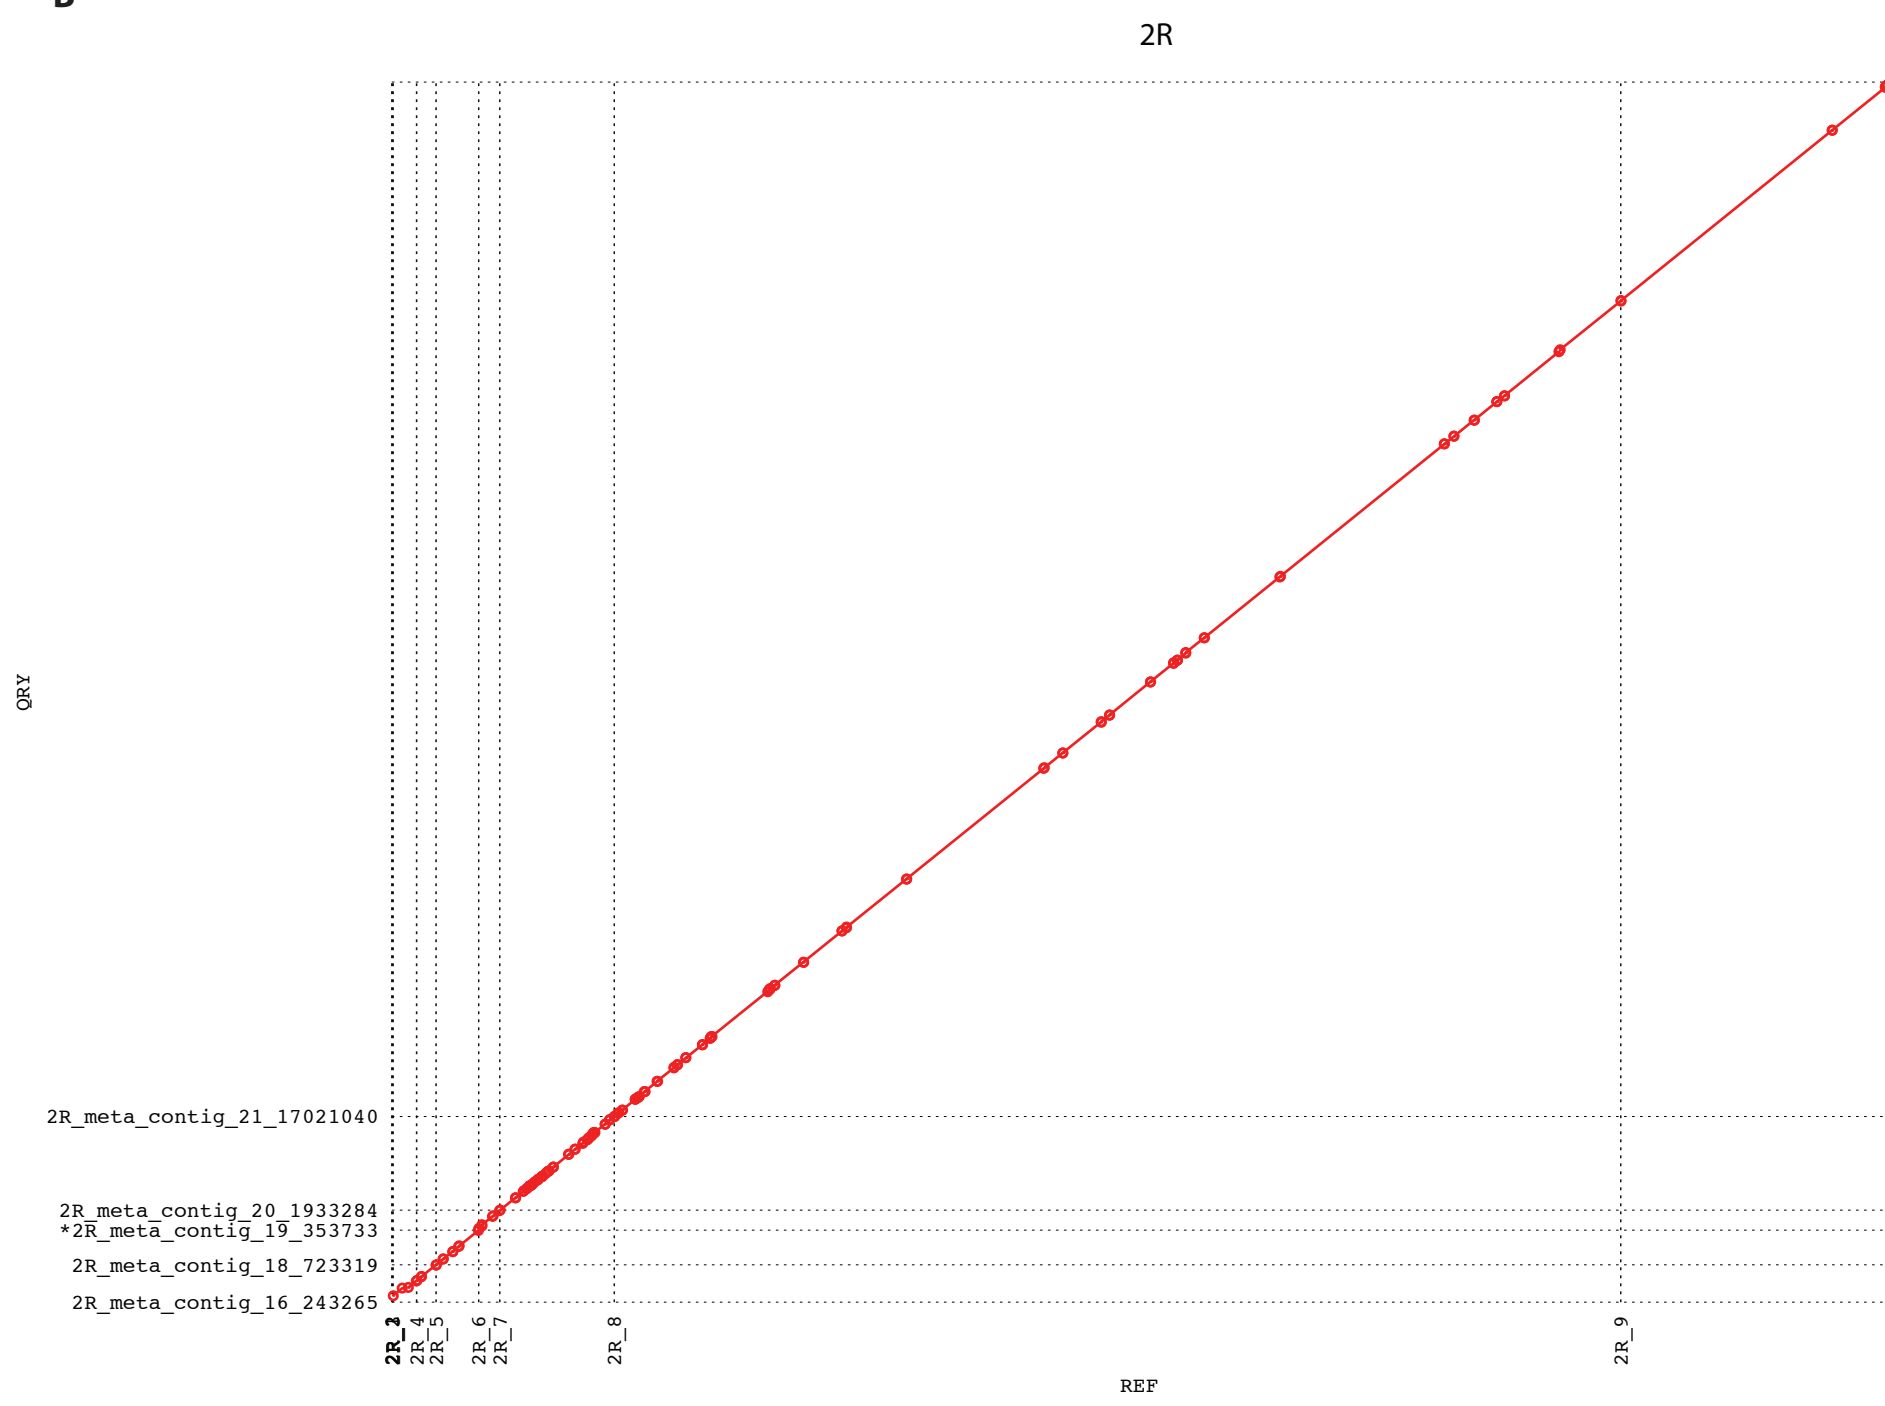

•

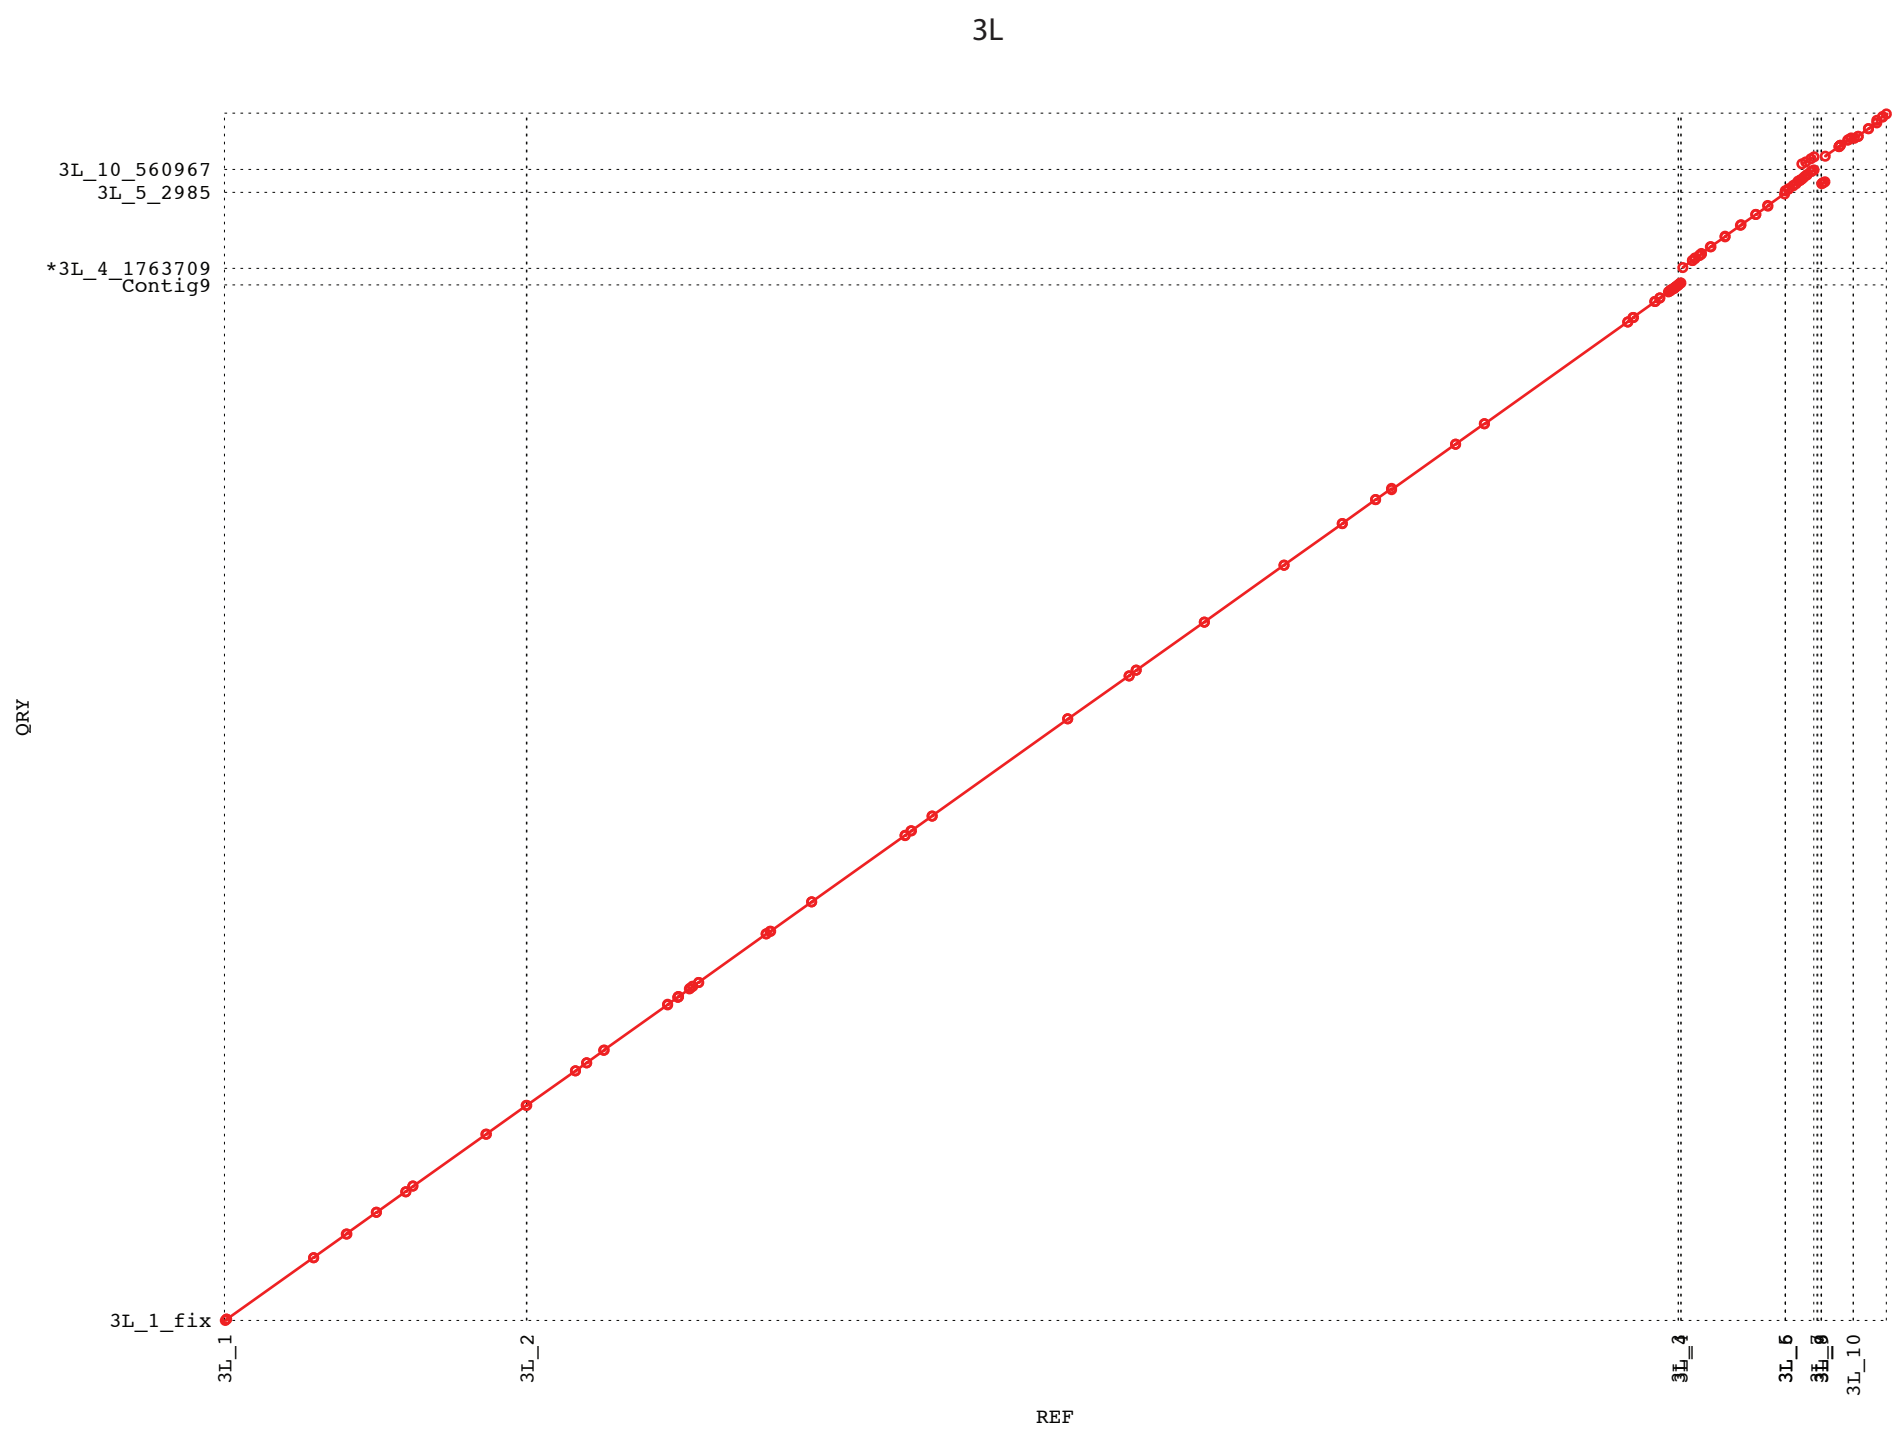

D

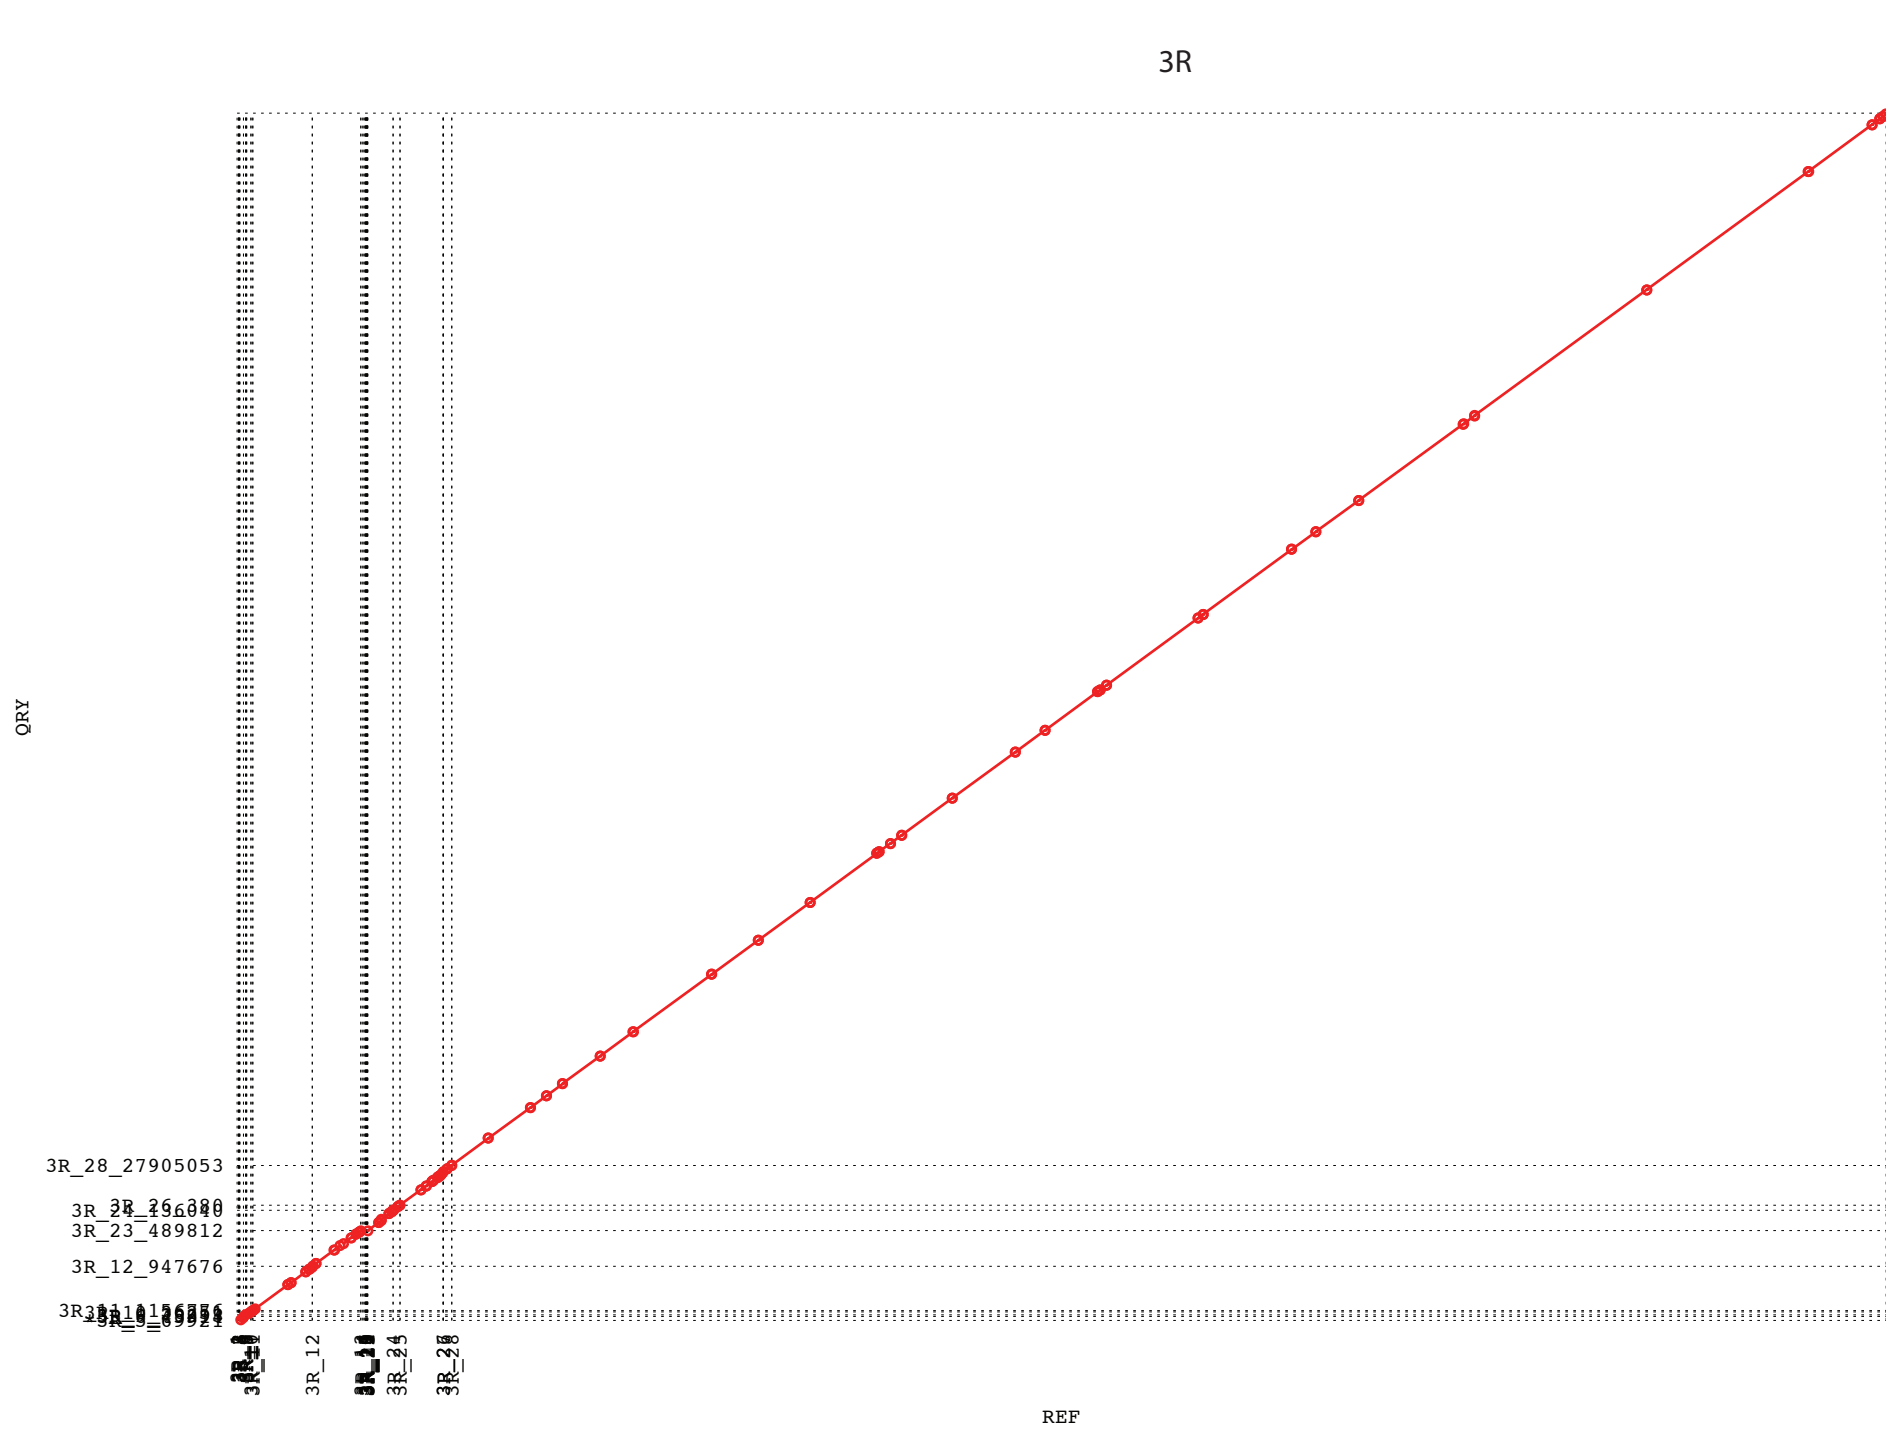

1

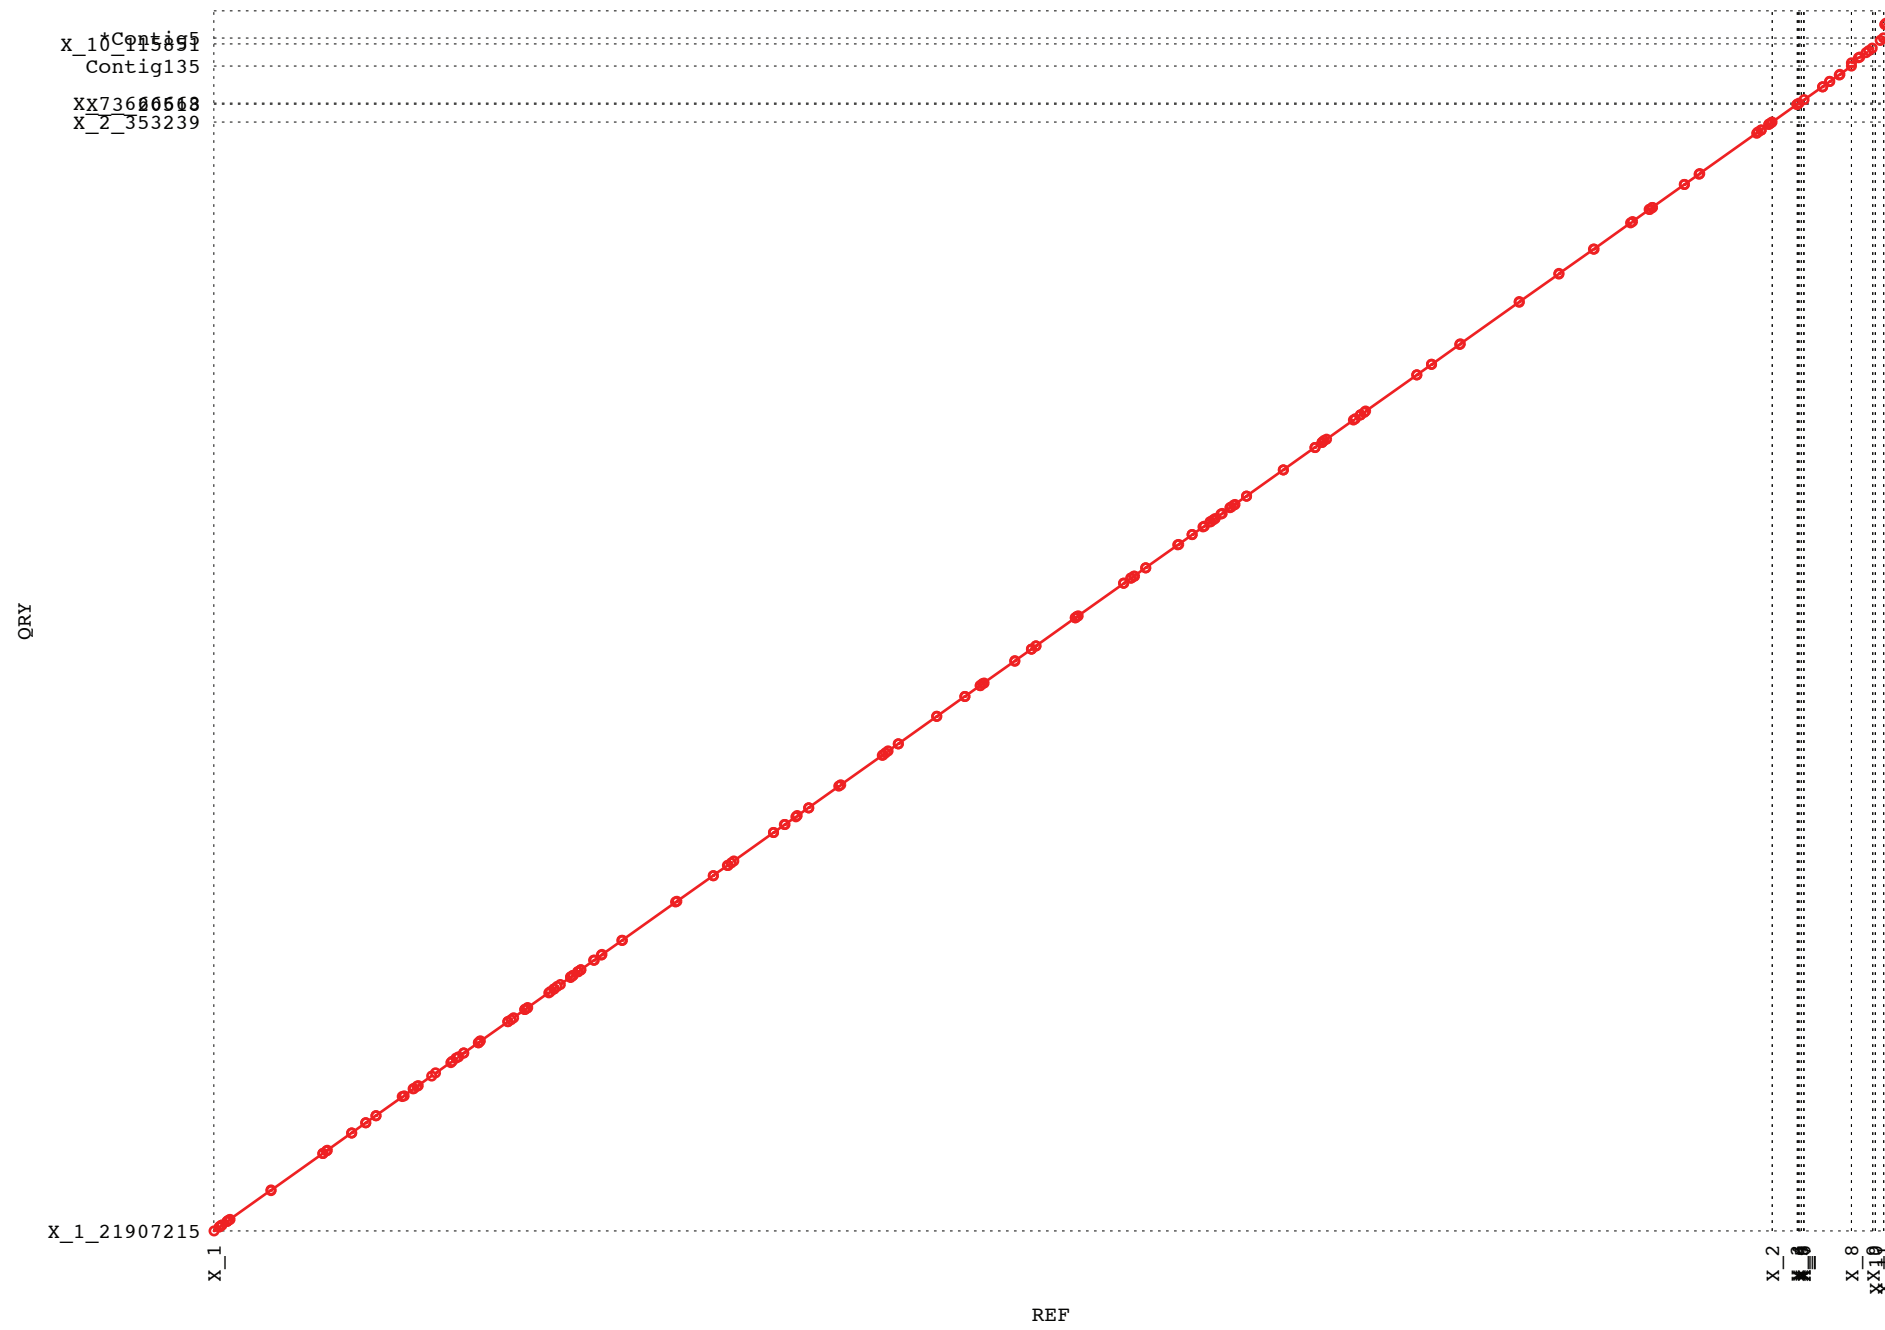

**Figure S2. MUMMER plots showing whole genome alignments between the R6 assembly and our new assembly for autosomes and X chromosome.** We mapped the contigs from our new assembly (y-axis) to the R6 contigs (x-axis) using MUMMER, and only report one-to-one alignments.
