# Supplementary material
Source: publisher figshare collection journal article supplement (https://gsajournals.figshare.com/articles/dataset/_/7294937)
Supplement: Supplementary file 6 [file 1]

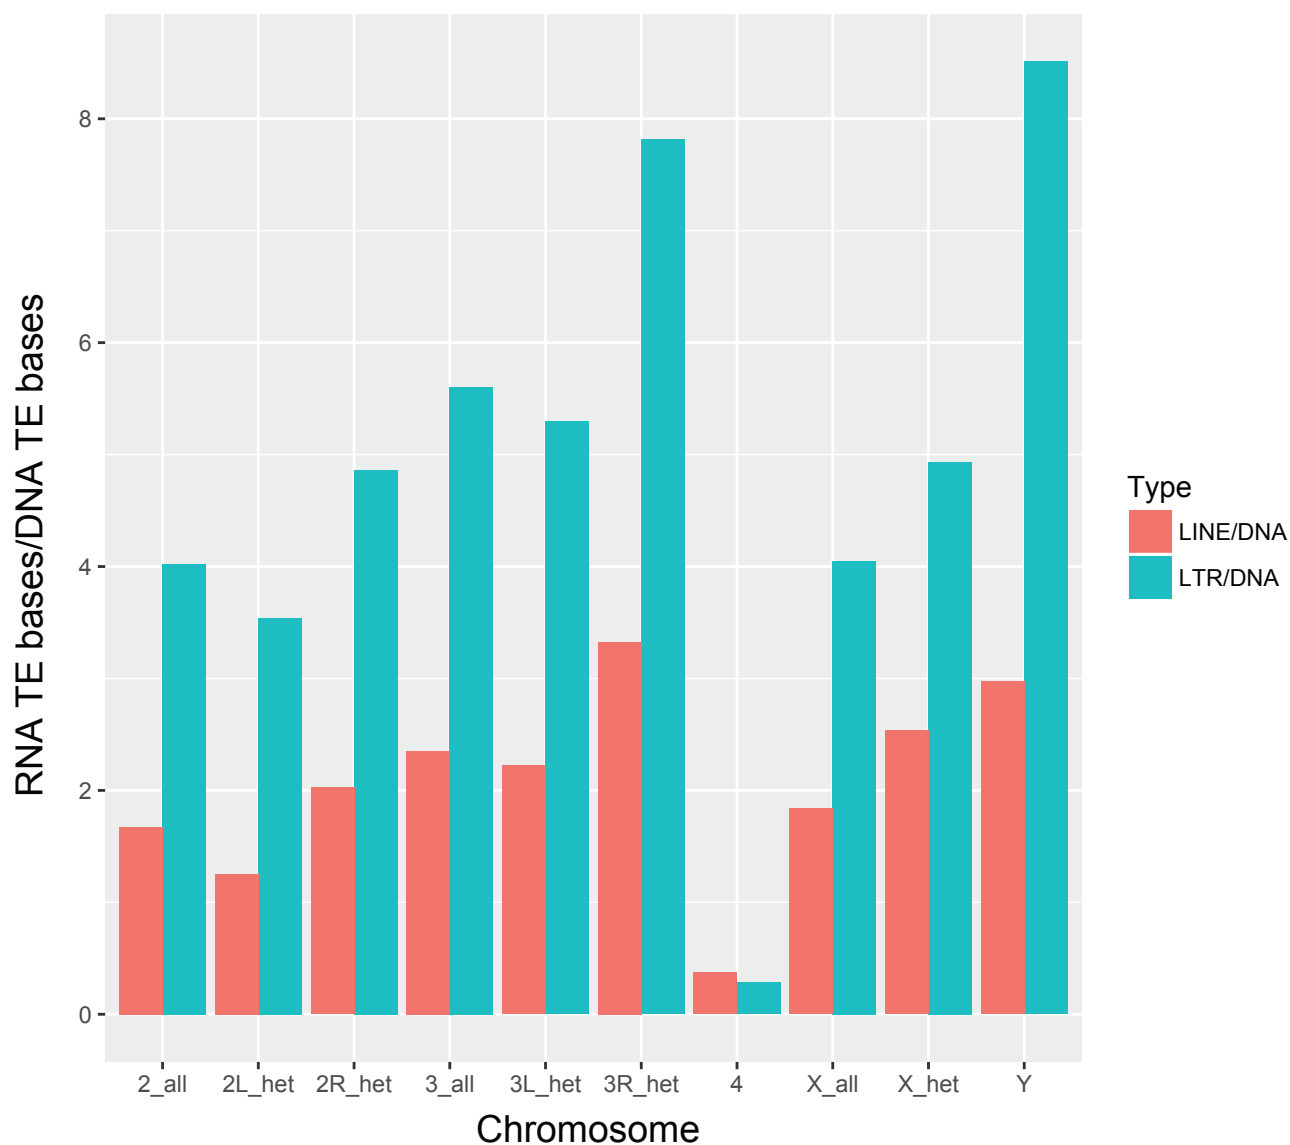

**Figure S5: The repeat component in heterochromatic regions.** We separated the repeat content by the chromatin states based on the coordinates in Hoskins et al. (2015). The total bases of LTR and LINE are normalized by the total bases of DNA transposons.
