# Supplementary material
Source: publisher figshare collection journal article supplement (https://gsajournals.figshare.com/articles/dataset/_/7294937)
Supplement: Supplementary file 7 [file 1]

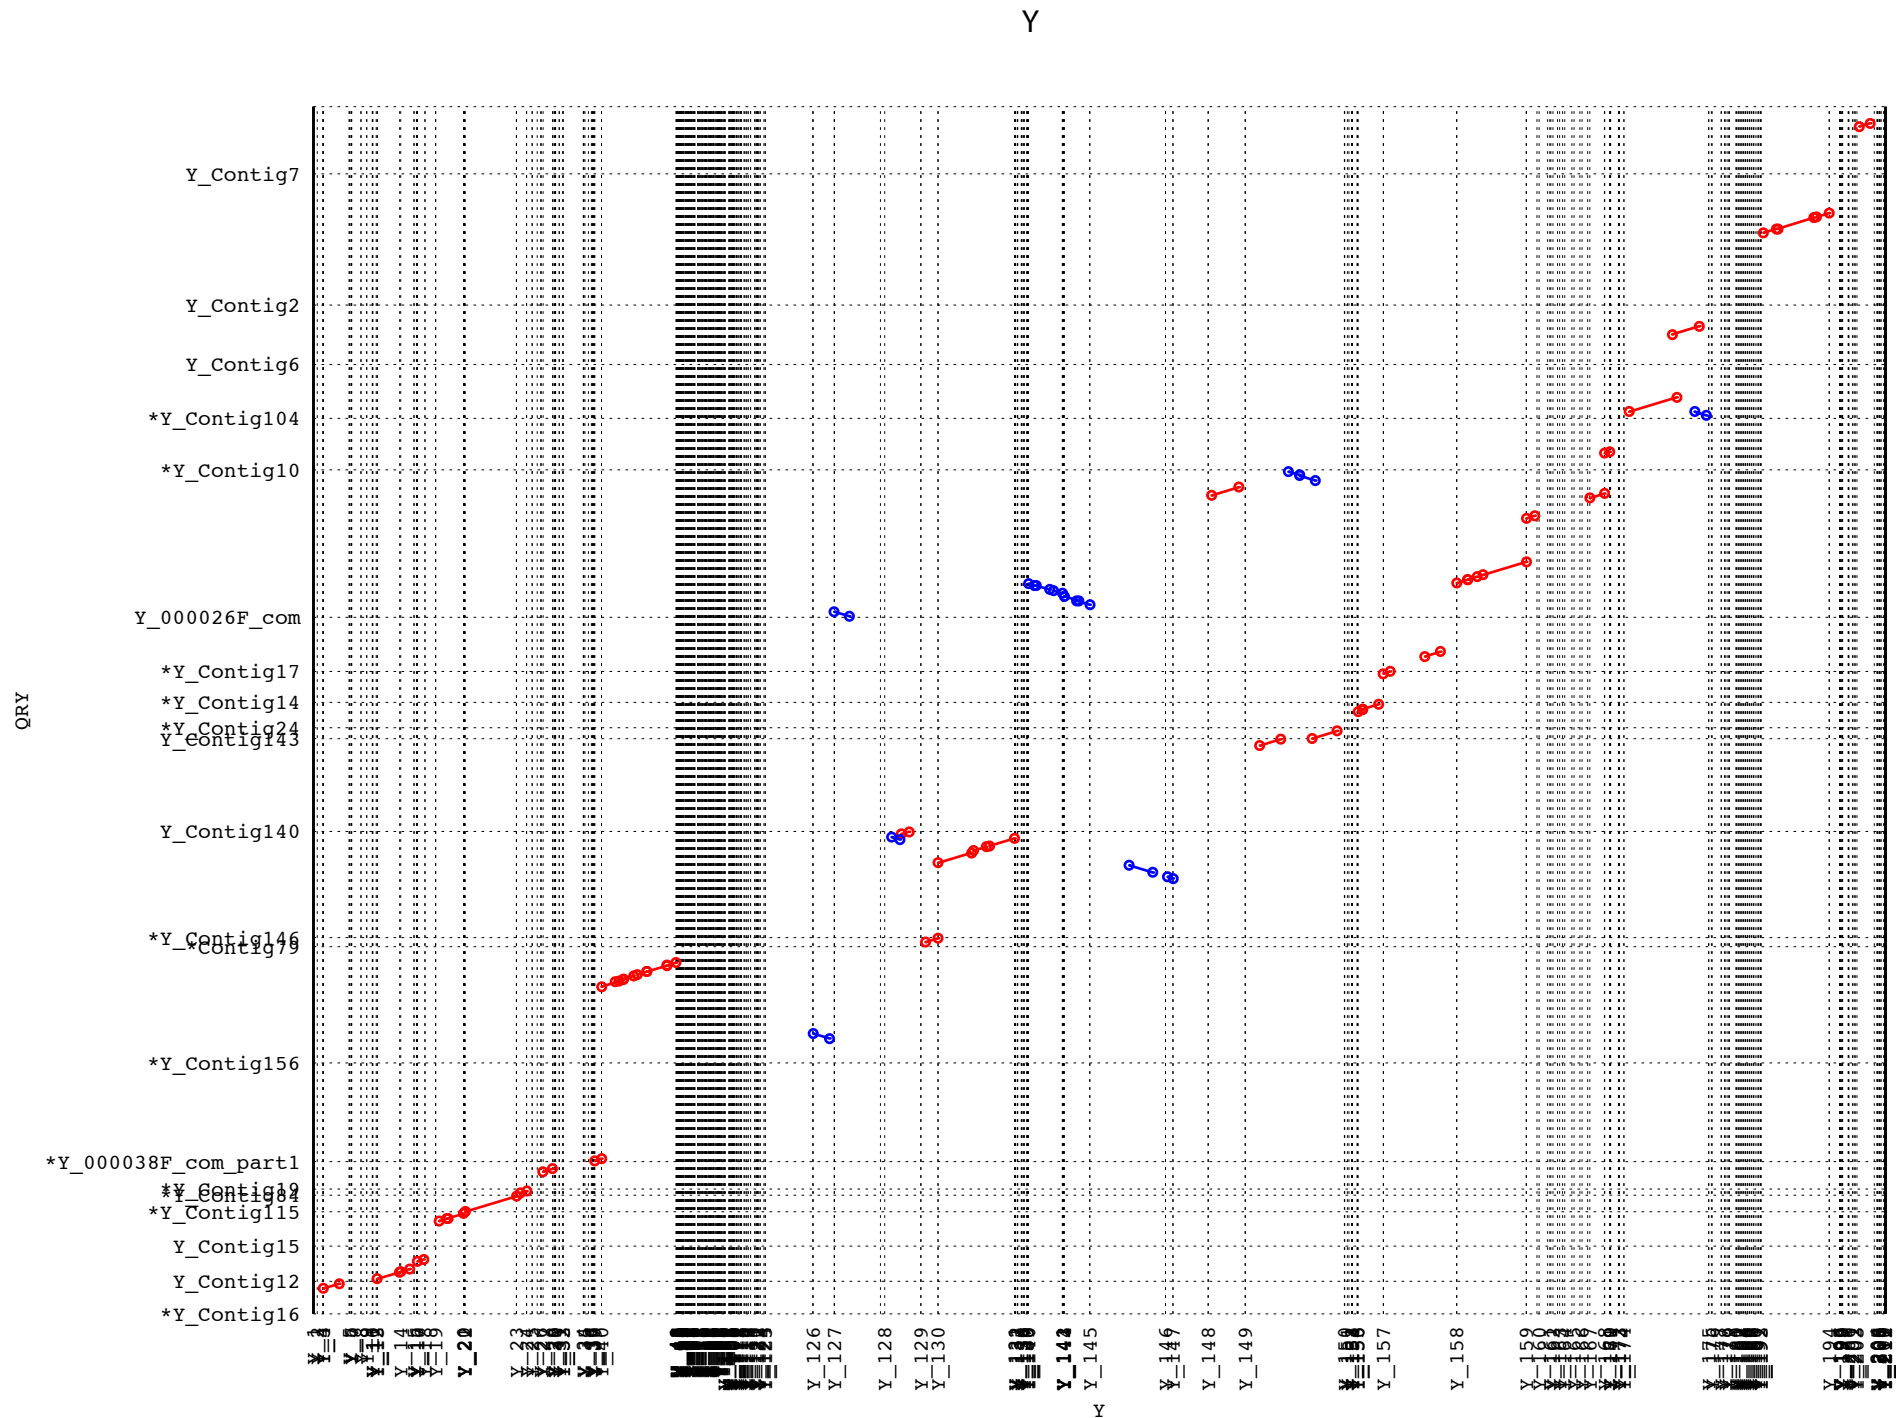

**Figure S3. MUMMER plots showing the alignment between R6 Y chromosome assembly and our new Y chromosome assembly.** We mapped the Y-linked contigs from our assembly (y-axis) to the R6 Y-linked contigs (x-axis) using MUMMER, and only report one-to-one alignments.
