# Supplementary material
Source: publisher figshare collection journal article supplement (https://gsajournals.figshare.com/articles/dataset/_/7294937)
Supplement: Supplementary file 8 [file 1]

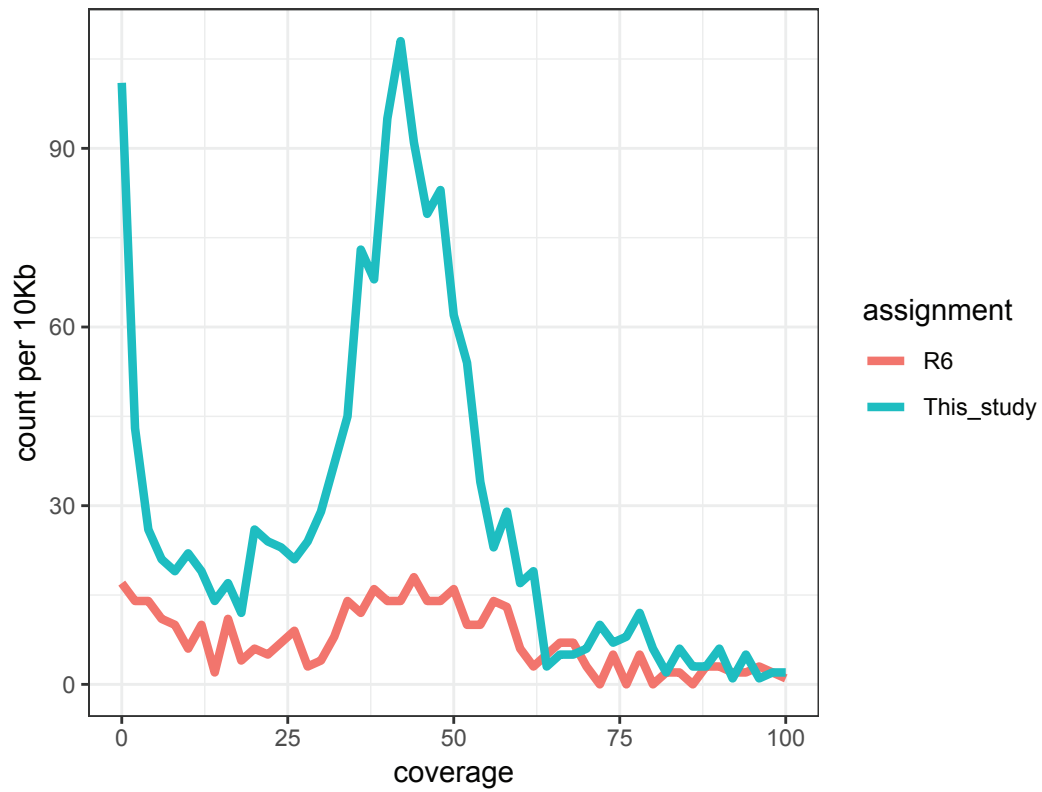

**Figure S5. Pacbio read coverage in Y-linked 10-kb windows from R6 and our assembly.** We compare the read coverage on each 10-kb windows of Y chromosome assemblies from our study and R6.
